# Supplementary material for: Comprehensive bioinformatics analytics and in vivo validation reveal SLC31A1 as an emerging diagnostic biomarker for acute myocardial infarction
Source: publisher site journal article supplement (doi:10.18632/aging.205199), 2024-05-06
Supplement: Supplementary file [file aging-v16i9-205199-supplementary-material-SD1.pdf]

## SUPPLEMENTARY FIGURES

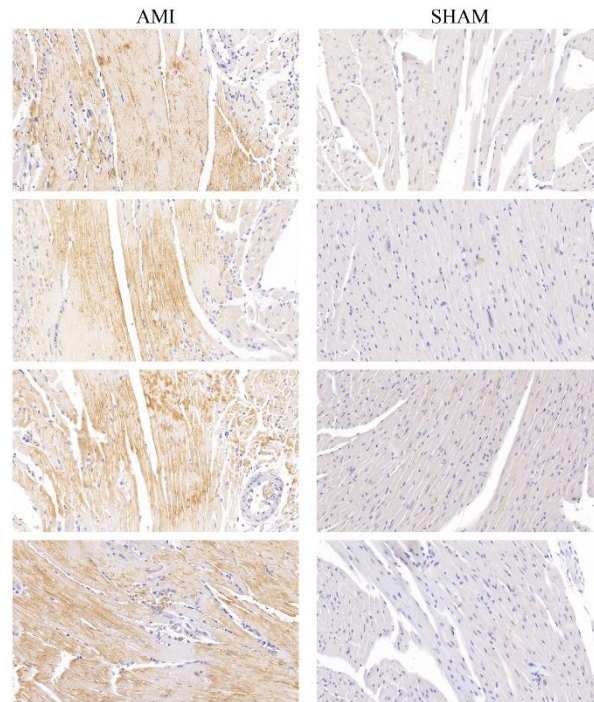

Supplementary Figure 1. Supplementary images of Masson staining slides.

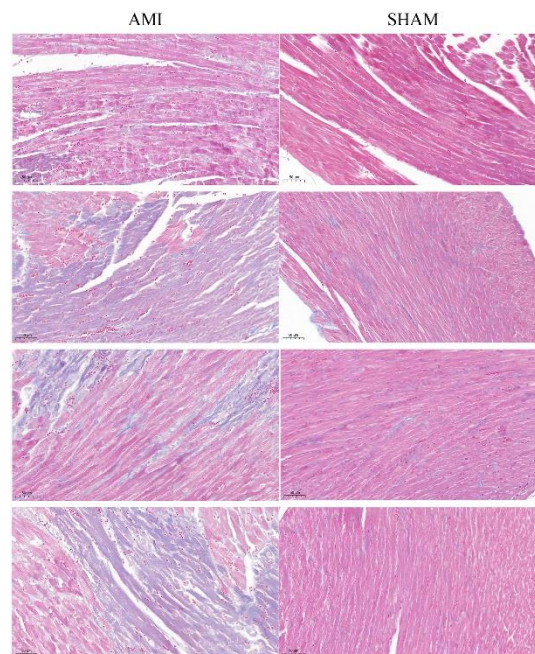

Supplementary Figure 2. IHC slides.
