# Supplementary material for: Comprehensive bioinformatics analytics and in vivo validation reveal SLC31A1 as an emerging diagnostic biomarker for acute myocardial infarction
Source: Aging (Albany NY). 2024 May 6;16(9):8361–77. doi: 10.18632/aging.205199 (PMC11132003; doi:10.18632/aging.205199)
Supplement: Supplementary Table 1 [file aging-16-205199-s002.xlsx]

## Sheet: aging-23-016103-s001
Supplementary Table 1. Detailed expression of the contributor genes in our own bulk sequencing cohort.
Symbol	description	a1	a2	a3	s1	s2	s3	G1	G2	G2_vs_G1_log2FoldChange	G2_vs_G1_Pvalue	G2_vs_G1_FDR
Zranb2	zinc finger, RAN-binding domain containing 2	10.7363	10.3138	10.5537	10.2229	10.4213	10.3573	10.5346	10.3338	-0.200761	0.178737	0.432226
Lrriq3	leucine-rich repeats and IQ motif containing 3	2.2078	3.58161	3.84913	3.4404	1.72461	1.99404	3.21284	2.38635	-0.826494	0.36561	0.698542
Dnase2b	deoxyribonuclease II beta	0	0	0	1.3313	0	0	0	0.443766	0.443766	0.717611	0.909308
Adgrl2	adhesion G protein-coupled receptor L2	10.2479	10.1972	9.97288	10.4719	10.9736	10.6278	10.1394	10.6911	0.551746	0.00124662	0.00803287
Rpf1	ribosome production factor 1 homolog	9.29003	8.89116	8.97431	8.68088	8.6799	8.85934	9.05183	8.74004	-0.311792	0.0697619	0.217542
Uox	urate oxidase	0	3.31863	0	2.65696	0	0	1.10621	0.885652	-0.220559	0.764757	0.927867
Ctbs	chitobiase, di-N-acetyl-	7.30245	7.90924	7.58219	7.46671	7.23667	7.26822	7.59796	7.32387	-0.274095	0.225178	0.510139
Spata1	spermatogenesis associated 1	5.01662	5.85438	5.55402	6.11339	6.22414	5.74708	5.47501	6.0282	0.553193	0.15631	0.394399
Ptprh	protein tyrosine phosphatase, receptor type, H	0	0	2.27256	0	0	0	0.75752	0	-0.75752	0.470221	0.797323
Sap30bp	SAP30 binding protein	9.78232	9.32502	9.4792	9.13255	9.14976	9.22088	9.52885	9.16773	-0.361119	0.0270234	0.103349
Mir491	microRNA 491	0	0	0	0	1.10598	0	0	0.36866	0.36866	0.839626	0.933154
Recql5	RecQ protein-like 5	8.13404	8.73444	8.09811	8.85396	8.41351	8.78648	8.3222	8.68465	0.362457	0.145506	0.374341
Itgb4	integrin beta 4	5.39312	8.28637	7.02595	8.45329	7.30134	7.68557	6.90181	7.8134	0.91159	0.492572	0.813964
Ahnak	AHNAK nucleoprotein (desmoyokin)	13.7451	13.8855	14.219	13.2388	13.437	13.1535	13.9499	13.2764	-0.673444	7.54e-05	0.0007356
Nlrp1a	NLR family, pyrin domain containing 1A	3.56793	4.85445	2.27256	3.22336	0	1.57966	3.56498	1.60101	-1.96397	0.08114	0.244118
Atp6v0d2	ATPase, H+ transporting, lysosomal V0 subunit D2	0	4.08402	2.94591	1.71125	2.75751	2.99304	2.34331	2.48726	0.143954	0.594325	0.875654
Cdk10	cyclin-dependent kinase 10	8.85523	9.08115	8.81774	9.58684	9.29182	9.55048	8.91804	9.47638	0.558339	0.000640696	0.00456364
Klf9	Kruppel-like factor 9	12.404	10.4195	12.4711	11.3668	11.0926	11.3179	11.7649	11.2591	-0.505758	0.203331	0.473828
Fgg	fibrinogen gamma chain	4.16124	2.58191	2.75439	0	0	0	3.16585	0	-3.16585	0.000428146	0.00323522
Sat2	spermidine/spermine N1-acetyl transferase 2	6.62545	6.50417	6.99378	6.65928	6.37198	7.14185	6.7078	6.72437	0.0165708	0.90565	0.970337
Tgs1	trimethylguanosine synthase 1	9.23908	8.75457	8.51183	8.51439	8.55285	8.20639	8.83516	8.42454	-0.410619	0.0606978	0.1954
Tmem68	transmembrane protein 68	8.56933	7.76454	8.08799	7.64121	7.59589	7.85006	8.14062	7.69572	-0.444901	0.0577942	0.188145
Rps20	ribosomal protein S20	11.6045	12.0356	11.5333	11.4559	11.4993	11.4188	11.7245	11.458	-0.266471	0.0881098	0.259609
---	---	0	0	0	0	1.10598	0	0	0.36866	0.36866	0.839626	0.933154
---	---	0	0	1.95377	2.0117	2.75751	0	0.651255	1.58974	0.938481	0.452372	0.785834
Ackr2	atypical chemokine receptor 2	7.83947	6.80373	7.43022	6.11339	5.78569	5.87482	7.35781	5.92463	-1.43317	7.41e-06	9.64e-05
Agtr2	angiotensin II receptor, type 2	0	0	0	1.3313	0	0	0	0.443766	0.443766	0.717611	0.909308
Gm10231	predicted pseudogene 10231	8.98457	9.02701	9.00423	9.48673	9.29447	9.59197	9.00527	9.45772	0.452453	0.00205531	0.0122474
4933415F23Rik	RIKEN cDNA 4933415F23 gene	0	0	0	1.3313	0	0	0	0.443766	0.443766	0.717611	0.909308
Stk4	serine/threonine kinase 4	9.46771	9.74454	9.36438	8.80834	8.89424	8.64312	9.52554	8.7819	-0.74364	1.1e-05	0.000136976
Cnr1	cannabinoid receptor 1 (brain)	3.41313	3.58161	0	1.71125	0	2.31557	2.33158	1.34227	-0.989307	0.251972	0.54967
Pgam1-ps1	phosphoglycerate mutase 1, pseudogene 1	1.1418	0.99817	0	0.814054	0	0	0.713325	0.271351	-0.441974	0.744121	0.92484
Gm1821	predicted gene 1821	11.2466	11.334	11.0954	10.8716	10.8276	11.0702	11.2253	10.9231	-0.30221	0.027327	0.104326
Nrn1l	neuritin 1-like	0	2.9968	0	1.71125	0	0	0.998932	0.570415	-0.428517	0.56	0.858741
Chrd	chordin	6.26705	7.10489	7.97718	7.3101	7.18047	7.10063	7.11637	7.19707	0.0806962	0.828452	0.933154
Gm13299	predicted gene 13299	0	0	0	0	0	0.996028	0	0.332009	0.332009	0.839626	0.933154
C030037D09Rik	RIKEN cDNA C030037D09 gene	6.04777	6.35393	6.61107	6.96965	7.20321	7.05819	6.33759	7.07702	0.73943	0.00764123	0.0370341
Hectd2os	Hectd2, opposite strand	5.96659	7.97363	7.38133	7.65213	8.10477	7.96362	7.10718	7.90684	0.799657	0.151635	0.385462
Ccdc142os	coiled-coil domain containing 142, opposite strand	3.04254	4.58145	3.94197	4.5227	5.00523	4.8992	3.85532	4.80904	0.95372	0.130895	0.34741
Tmed9	transmembrane p24 trafficking protein 9	11.1844	11.3517	11.1117	10.9979	10.7716	11.0722	11.2159	10.9472	-0.268731	0.0617441	0.198105
Gm2531	predicted gene 2531	0	0	0	0	1.10598	1.57966	0	0.895215	0.895215	0.519531	0.838189
Gm5600	predicted gene 5600	0	0	0	0	1.10598	0	0	0.36866	0.36866	0.839626	0.933154
Erap1	endoplasmic reticulum aminopeptidase 1	9.29558	9.78588	9.11804	9.91945	10.0151	9.93896	9.39983	9.95782	0.557995	0.00687589	0.033905
AA474408	expressed sequence AA474408	6.12463	5.12573	5.18761	3.87249	5.05609	3.4522	5.47932	4.12693	-1.35239	0.0217309	0.086561
Cast	calpastatin	12.9023	12.3261	12.8134	11.7488	12.0268	11.9209	12.6806	11.8989	-0.781746	1.48e-05	0.000177961
---	---	0	0	0	0.814054	0	0	0	0.271351	0.271351	0.839626	0.933154
---	---	2.2078	1.58252	1.54394	0	2.15619	2.31557	1.77809	1.49059	-0.287502	0.975038	0.988975
---	---	0	2.58191	2.5335	1.3313	1.10598	0.996028	1.70514	1.14444	-0.560701	0.364806	0.697411
Rhobtb3	Rho-related BTB domain containing 3	8.31983	8.11529	8.28251	8.17918	8.50331	8.43086	8.23921	8.37112	0.131906	0.462735	0.793062
---	---	0	0	1.54394	0	0	0	0.514647	0	-0.514647	0.642125	0.875654
---	---	0	0	1.95377	0	0	0	0.651255	0	-0.651255	0.538612	0.843174
4930596I21Rik	RIKEN cDNA 4930596I21 gene	0	0	1.95377	0.814054	1.10598	0	0.651255	0.640012	-0.0112439	0.825445	0.933154
Gm44348	predicted gene, 44348	1.1418	0	0	0	0	0	0.380602	0	-0.380602	0.787905	0.927867
Pebp4	phosphatidylethanolamine binding protein 4	0	0	0	0.814054	0	0	0	0.271351	0.271351	0.839626	0.933154
Gm16071	predicted gene 16071	0	2.319	0	0	0	0	0.773	0	-0.773	0.461623	0.792048
Gm17249	predicted gene, 17249	5.3078	4.58145	3.4032	5.33712	6.03424	5.16219	4.43082	5.51119	1.08037	0.0831177	0.248525
Vwa3a	von Willebrand factor A domain containing 3A	9.24196	8.59254	9.09042	8.81321	8.93218	8.44328	8.97497	8.72956	-0.245417	0.25745	0.557851
Rrp8	ribosomal RNA processing 8, methyltransferase, homolog (yeast)	9.83664	9.06243	8.84804	8.27056	8.23188	8.14689	9.24904	8.21644	-1.03259	3.09e-05	0.000340131
Zfp652os	zinc finger protein 652, opposite strand	3.04254	0	3.4032	2.82072	0	1.99404	2.14858	1.60492	-0.54366	0.563724	0.862
Arfip2	ADP-ribosylation factor interacting protein 2	9.81361	9.77278	10.0015	9.7147	9.63069	9.5428	9.86262	9.6294	-0.23322	0.0930162	0.270099
Ppp6c	protein phosphatase 6, catalytic subunit	10.625	10.3205	10.1919	10.1545	10.3657	10.2173	10.3791	10.2458	-0.133333	0.375971	0.710131
Psmb7	proteasome (prosome, macropain) subunit, beta type 7	11.7577	11.4594	11.7178	11.6227	11.6965	11.7093	11.6449	11.6762	0.0312322	0.846221	0.937259
Nr5a1	nuclear receptor subfamily 5, group A, member 1	0	2.319	0	0	0	0	0.773	0	-0.773	0.461623	0.792048
Uqcrc2	ubiquinol cytochrome c reductase core protein 2	14.1233	13.676	14.0321	14.3808	14.4797	14.6088	13.9438	14.4898	0.545942	0.00132233	0.00843182
Golga1	golgi autoantigen, golgin subfamily a, 1	9.2217	9.28636	8.9325	9.04208	9.38677	9.1032	9.14685	9.17735	0.030496	0.868848	0.950466
Arpc5l	actin related protein 2/3 complex, subunit 5-like	10.6812	10.0516	10.2901	10.5586	10.8457	10.7824	10.341	10.7289	0.387941	0.050883	0.170648
Mrpl49	mitochondrial ribosomal protein L49	8.52749	9.39509	8.32191	10.0887	10.2324	10.0675	8.74816	10.1296	1.38139	8.3e-07	1.39e-05
Ddn	dendrin	6.72753	3.58161	4.18928	4.08075	4.44255	4.07998	4.83281	4.20109	-0.631712	0.0880409	0.259507
---	---	0	2.319	0	0	0	0	0.773	0	-0.773	0.461623	0.792048
Gm10774	predicted pseudogene 10774	1.1418	5.551	0.969343	0.814054	1.10598	5.82508	2.55405	2.5817	0.0276526	0.903077	0.968676
---	---	5.01662	5.66884	5.33184	6.57001	6.69444	6.93462	5.3391	6.73302	1.39392	2.11e-05	0.000243493
Gm11665	predicted gene 11665	3.70771	1.99725	0	2.26024	3.18065	2.31557	1.90166	2.58549	0.683832	0.942547	0.980249
Ubap1l	ubiquitin-associated protein 1-like	4.25539	1.99725	5.18761	1.71125	2.15619	2.57834	3.81342	2.14859	-1.66483	0.0119359	0.0534225
Syce2	synaptonemal complex central element protein 2	5.12035	6.35393	5.63968	5.00378	4.71995	4.8992	5.70465	4.87431	-0.830344	0.0376656	0.134721
Gm11605	predicted gene 11605	5.39312	6.48823	5.5243	4.96928	4.44255	4.9465	5.80188	4.78611	-1.01577	0.0162209	0.0686946
Gm13532	predicted gene 13532	1.7711	0	0	0.814054	0	0.996028	0.590366	0.603361	0.0129944	0.895996	0.966064
Rplp0-ps1	ribosomal protein, large, P0, pseudogene 1	0	0	0.969343	1.3313	0	0.996028	0.323114	0.775775	0.452661	0.702586	0.907462
Gm13022	predicted gene 13022	0	0.99817	0	0	0	0	0.332723	0	-0.332723	0.787905	0.927867
Gm13423	predicted gene 13423	3.70771	2.58191	3.94197	3.62903	3.50742	3.57767	3.41053	3.57137	0.160842	0.930225	0.980249
2610035F20Rik	RIKEN cDNA 2610035F20 gene	0	0	1.54394	0	0	0	0.514647	0	-0.514647	0.642125	0.875654
Bid	BH3 interacting domain death agonist	6.89777	7.81014	6.97193	6.04877	5.69231	6.03656	7.22661	5.92588	-1.30073	6.48e-05	0.000643474
Mir7079	microRNA 7079	1.1418	0.99817	0.969343	0.814054	1.10598	0.996028	1.03644	0.972021	-0.0644183	0.94473	0.980249
Kctd12	potassium channel tetramerisation domain containing 12	10.0188	10.5002	9.67956	9.91152	9.85013	9.50578	10.0662	9.75581	-0.310371	0.13628	0.357372
Acot7	acyl-CoA thioesterase 7	10.2622	10.3138	10.1585	10.8821	10.7544	11.15	10.2448	10.9288	0.684026	4.09e-06	5.74e-05
Gm5037	predicted gene 5037	1.1418	0	0.969343	0	1.10598	0	0.703716	0.36866	-0.335056	0.739245	0.922012
Gm22009	predicted gene, 22009	5.90982	5.85438	6.27865	5.91014	7.01036	6.99211	6.01428	6.63753	0.623251	0.0684382	0.214518
Gm11906	predicted gene 11906	0	0	1.54394	1.3313	0	0	0.514647	0.443766	-0.0708806	0.940658	0.980249
Gm15342	predicted gene 15342	2.54257	0	2.27256	0	0	0	1.60504	0	-1.60504	0.112884	0.311776
Arhgap27os3	Rho GTPase activating protein 27, opposite strand 3	3.95222	4.80382	2.75439	4.08075	2.98454	3.16286	3.83681	3.40938	-0.427434	0.436107	0.770433
D030047H15Rik	RIKEN cDNA D030047H15 gene	2.2078	0	0.969343	2.65696	0	2.31557	1.05905	1.65751	0.59846	0.535004	0.843174
Gm15912	predicted gene 15912	4.25539	6.01876	6.63907	5.75676	5.28655	6.1419	5.63774	5.7284	0.0906631	0.757158	0.927867
Gm15229	predicted gene 15229	0	0	0	1.3313	0	0	0	0.443766	0.443766	0.717611	0.909308
2610507I01Rik	RIKEN cDNA 2610507I01 gene	5.72472	7.48821	6.16768	7.60796	7.89727	7.71318	6.4602	7.73947	1.27927	0.00909711	0.0425756
Gm12224	predicted gene 12224	1.7711	2.319	3.52825	4.26269	4.89779	4.74723	2.53945	4.6359	2.09645	0.0033003	0.0181955
Hpgds	hematopoietic prostaglandin D synthase	5.21712	7.12565	5.49396	6.72279	6.97114	6.74701	5.94557	6.81365	0.868073	0.207299	0.480488
Mrps33	mitochondrial ribosomal protein S33	9.74427	9.51401	9.5193	10.1332	10.2489	10.2878	9.59253	10.2233	0.630789	5.29e-06	7.15e-05
Clec5a	C-type lectin domain family 5, member a	8.81328	8.44343	7.85117	5.39025	5.32853	5.63606	8.36929	5.45161	-2.91768	3.25e-22	5.66e-20
Agk	acylglycerol kinase	8.47953	8.40574	8.11815	8.76625	9.03083	8.5994	8.33447	8.79883	0.464356	0.0171272	0.0716809
Ssbp1	single-stranded DNA binding protein 1	9.81554	9.80209	9.70296	9.95735	9.9324	9.91835	9.77353	9.93603	0.162502	0.180899	0.436004
Mad2l1	MAD2 mitotic arrest deficient-like 1	6.51558	7.73782	6.9158	6.97835	7.11001	6.74701	7.0564	6.94512	-0.111281	0.563631	0.861989
Prdm5	PR domain containing 5	8.09637	7.65457	7.99895	7.87815	7.97202	7.92282	7.91663	7.92433	0.00769763	0.987264	0.995047
Snord71	small nucleolar RNA, C/D box 71	1.1418	0	1.95377	0	0	1.57966	1.03186	0.526555	-0.505302	0.683898	0.895616
Mkrn3	makorin, ring finger protein, 3	4.34377	3.80395	3.84913	4.26269	4.51706	4.57734	3.99895	4.45236	0.453414	0.376833	0.711029
Gm22018	predicted gene, 22018	0	0	0	1.71125	1.10598	0	0	0.939075	0.939075	0.475726	0.802259
Gm22027	predicted gene, 22027	1.7711	1.99725	1.54394	2.26024	2.48795	0	1.77076	1.58273	-0.188033	0.888525	0.961886
Gm13285	predicted gene 13285	1.1418	0	0.969343	1.3313	0	0.996028	0.703716	0.775775	0.0720595	0.910991	0.97334
Prss16	protease, serine 16 (thymus)	3.04254	7.38868	3.11496	1.3313	0	1.57966	4.51539	0.970321	-3.54507	0.00121351	0.00785695
Edaradd	EDAR (ectodysplasin-A receptor)-associated death domain	3.41313	3.80395	0	3.10122	1.72461	1.99404	2.40569	2.27329	-0.132405	0.522173	0.839072
---	---	2.54257	0	1.95377	1.3313	1.72461	1.99404	1.49878	1.68331	0.184535	0.908536	0.9725
Hpse	heparanase	6.41717	8.1359	7.56039	6.42479	5.65979	5.89907	7.37116	5.99455	-1.37661	0.000456101	0.00342087
Ifi209	interferon activated gene 209	7.76139	9.05163	7.15761	6.3054	6.10841	4.74723	7.99021	5.72035	-2.26986	2.7e-06	3.97e-05
Uevld	UEV and lactate/malate dehyrogenase domains	7.26898	8.3539	8.0778	8.27056	8.14645	7.94627	7.90023	8.12109	0.220868	0.582682	0.875654
Olfr1031	olfactory receptor 1031	0	0	4.26311	0	0	0	1.42104	0	-1.42104	0.0505597	0.169714
Gm22029	predicted gene, 22029	0	1.58252	0	0	0	0	0.527507	0	-0.527507	0.632842	0.875654
Ssc5d	scavenger receptor cysteine rich family, 5 domains	7.26898	8.31376	8.04154	8.8421	8.90469	8.52345	7.87476	8.75674	0.881984	0.0025268	0.0145505
Plekhj1	pleckstrin homology domain containing, family J member 1	8.68381	8.50414	8.1574	8.55276	8.30204	8.23525	8.44845	8.36335	-0.0851035	0.660099	0.879243
Sap30	sin3 associated polypeptide	7.68732	8.27247	8.1574	7.67372	7.56987	7.63594	8.03906	7.62651	-0.412554	0.0494547	0.167079
Rps2	ribosomal protein S2	14.1594	14.2494	14.121	14.0781	13.8725	14.0212	14.1766	13.9906	-0.185999	0.14571	0.374801
Tmem30b	transmembrane protein 30B	4.50578	4.80382	2.5335	4.70148	2.75751	2.80054	3.9477	3.41984	-0.527859	0.547601	0.850332
Gm9761	predicted gene 9761	7.69574	7.27249	7.05742	6.59285	6.59475	6.51569	7.34188	6.56776	-0.774116	0.00269773	0.015403
Zxdc	ZXD family zinc finger C	9.23331	8.71059	8.86296	8.60706	8.72775	8.67154	8.93562	8.66879	-0.266836	0.134431	0.353864
Cops8	COP9 signalosome subunit 8	11.128	10.6393	11.0795	10.9511	10.9223	11.1012	10.9489	10.9915	0.0426042	0.862671	0.947018
Gm8534	predicted gene 8534	1.7711	0	0	0	0	0.996028	0.590366	0.332009	-0.258357	0.746251	0.926341
Gbp8	guanylate-binding protein 8	4.25539	6.18621	4.40033	6.31917	5.65979	5.07974	4.94731	5.68623	0.738925	0.36296	0.695331
Rps8-ps2	ribosomal protein S8, pseudogene 2	4.16124	4.99645	4.40033	4.37238	3.99836	4.31437	4.51934	4.22837	-0.290968	0.514895	0.837142
Gm20731	predicted gene, 20731	3.95222	2.319	4.69525	2.26024	2.75751	0	3.65549	1.67258	-1.98291	0.038194	0.136235
Cst7	cystatin F (leukocystatin)	2.54257	3.4561	2.75439	2.65696	2.15619	2.31557	2.91769	2.37624	-0.541453	0.451028	0.78467
Gm22039	predicted gene, 22039	0	0	0	0	1.10598	0.996028	0	0.70067	0.70067	0.642102	0.875654
Kdm4d	lysine (K)-specific demethylase 4D	0	0	0	0	1.72461	0	0	0.574869	0.574869	0.625351	0.875654
Nanp	N-acetylneuraminic acid phosphatase	4.71907	5.42269	4.58441	5.28197	4.89779	4.99229	4.90872	5.05735	0.148627	0.798018	0.933154
Wfdc2	WAP four-disulfide core domain 2	6.82287	10.4131	3.64332	9.36096	3.35327	4.24039	6.95978	5.65154	-1.30823	0.579484	0.875452
Pigt	phosphatidylinositol glycan anchor biosynthesis, class T	9.7402	10.1166	9.85993	9.87121	9.77621	10.0103	9.90557	9.88589	-0.0196781	0.871559	0.95183
Etv4	ets variant 4	6.55314	6.12567	7.22383	4.47431	4.7817	4.63622	6.63421	4.63074	-2.00347	2.38e-07	4.51e-06
Mpo	myeloperoxidase	2.54257	2.319	0	2.47219	0	2.31557	1.62052	1.59592	-0.024604	0.997467	0.998722
AC122305.1	---	4.34377	0	0	2.65696	0	2.31557	1.44792	1.65751	0.209585	0.583164	0.875654
Igkv3-5	immunoglobulin kappa chain variable 3-5	2.81411	3.58161	0	5.0704	1.72461	3.4522	2.1319	3.41574	1.28383	0.227827	0.513262
Ppt2	palmitoyl-protein thioesterase 2	8.91775	9.06512	8.95773	9.88978	9.54649	9.91835	8.9802	9.78487	0.804669	5.45e-07	9.49e-06
Zfp296	zinc finger protein 296	3.70771	3.99657	3.74989	4.42424	4.36399	4.69279	3.81806	4.49368	0.675619	0.178484	0.43172
Prkcg	protein kinase C, gamma	8.36276	7.35391	9.32182	7.92391	7.81844	7.54668	8.34616	7.76301	-0.583155	0.0491624	0.166332
Nlrp12	NLR family, pyrin domain containing 12	6.74387	6.69681	6.73301	1.71125	1.72461	3.16286	6.72456	2.19957	-4.52499	3.14e-18	3.48e-16
Cacng6	calcium channel, voltage-dependent, gamma subunit 6	1.7711	3.58161	3.52825	4.74292	4.71995	4.9465	2.96032	4.80312	1.8428	0.00604797	0.0303762
Eif5a	eukaryotic translation initiation factor 5A	13.6157	13.3008	13.2602	12.5907	12.5099	12.6693	13.3923	12.59	-0.8023	5.08e-08	1.11e-06
Rnf5	ring finger protein 5	8.45494	9.0891	8.25563	9.59535	9.12019	9.59383	8.59989	9.43646	0.836566	0.00129993	0.00831171
Gp6	glycoprotein 6 (platelet)	0	2.80422	4.46433	1.71125	0	0	2.42285	0.570415	-1.85243	0.0482962	0.164061
1700030C10Rik	RIKEN cDNA 1700030C10 gene	5.3078	5.90329	5.63968	3.87249	5.24331	4.57734	5.61692	4.56438	-1.05254	0.0352791	0.12758
Dcun1d3	DCN1, defective in cullin neddylation 1, domain containing 3 (S. cerevisiae)	9.56743	8.4922	8.96328	7.99851	8.04308	7.81863	9.00764	7.95341	-1.05423	4.1e-05	0.000431557
Abca12	ATP-binding cassette, sub-family A (ABC1), member 12	3.04254	5.75129	4.89426	6.68077	7.09792	6.77348	4.5627	6.85072	2.28802	0.000275228	0.00222867
Nop56	NOP56 ribonucleoprotein	12.0624	10.7612	10.7325	10.0715	10.0932	9.97505	11.1854	10.0466	-1.13876	4.81e-05	0.000497897
Foxc1	forkhead box C1	7.98398	7.75124	8.26465	7.9551	7.99826	7.89897	7.99996	7.95078	-0.0491793	0.752981	0.927867
Snrpb	small nuclear ribonucleoprotein B	11.1303	10.6924	10.9017	10.8575	10.6129	10.8601	10.9081	10.7768	-0.131298	0.395403	0.728999
Gm20627	predicted gene 20627	0	1.58252	1.95377	3.22336	1.10598	1.99404	1.17876	2.10779	0.92903	0.350448	0.681004
Gm20691	predicted gene 20691	0	1.99725	1.54394	2.0117	2.75751	2.31557	1.1804	2.36159	1.18119	0.315459	0.639252
Gm9843	predicted gene 9843	8.66249	8.99916	8.9798	8.47497	8.1168	8.52345	8.88048	8.37174	-0.508743	0.00900351	0.0422445
Idh3b	isocitrate dehydrogenase 3 (NAD+) beta	13.7582	13.2725	13.4896	14.1258	14.0934	14.3625	13.5068	14.1939	0.687125	8.9e-05	0.000851462
4833422M21Rik	RIKEN cDNA 4833422M21 gene	0	0	0	2.65696	1.72461	2.31557	0	2.23238	2.23238	0.0254781	0.0985465
Gm10687	predicted gene 10687	7.74526	7.30924	6.65287	7.37743	7.55226	7.34082	7.23579	7.42351	0.187717	0.675035	0.888514
1110019D14Rik	RIKEN cDNA 1110019D14 gene	3.41313	5.24436	3.74989	6.63748	6.93083	6.60684	4.13579	6.72505	2.58925	9.11e-07	1.51e-05
Gm17597	predicted gene, 17597	0	0	0	2.0117	0	0	0	0.670568	0.670568	0.544643	0.847629
Gm26509	predicted gene, 26509	0	1.58252	1.54394	1.3313	0	1.99404	1.04215	1.10845	0.0662913	0.921657	0.979692
Nme8	NME/NM23 family member 8	2.2078	0	0	0	0	2.99304	0.735934	0.997681	0.261747	0.710186	0.909308
Smc1a	structural maintenance of chromosomes 1A	11.0365	11.0523	10.6298	10.7606	10.8239	10.8018	10.9062	10.7954	-0.110749	0.425925	0.761099
Lilr4b	leukocyte immunoglobulin-like receptor, subfamily B, member 4B	12.8457	11.9392	11.7389	8.93441	8.77406	9.24709	12.1746	8.98519	-3.18943	7.08e-32	3.02e-29
Cyyr1	cysteine and tyrosine-rich protein 1	11.8763	9.92708	10.8539	10.8439	11.3384	10.9765	10.8858	11.0529	0.167154	0.955458	0.984472
AC158600.1	---	3.04254	3.4561	2.94591	2.82072	3.35327	3.4522	3.14819	3.20873	0.0605445	0.932803	0.980249
1700020A23Rik	RIKEN cDNA 1700020A23 gene	3.56793	1.99725	1.95377	0	0	2.57834	2.50632	0.859446	-1.64687	0.259064	0.560226
Srsf6	serine/arginine-rich splicing factor 6	12.4985	12.0353	11.8795	12.1166	12.0591	11.9704	12.1377	12.0487	-0.0890264	0.541871	0.846527
Cpxm1	carboxypeptidase X 1 (M14 family)	8.54624	9.50414	9.29567	8.37309	8.46618	7.92872	9.11535	8.25599	-0.859354	0.000890432	0.00603861
Nr0b2	nuclear receptor subfamily 0, group B, member 2	4.84554	6.97365	6.26074	7.58536	7.50728	7.53898	6.02664	7.54387	1.51723	0.00329553	0.0181758
Gm22042	predicted gene, 22042	0	0	0	0	0	0.996028	0	0.332009	0.332009	0.839626	0.933154
Tsg101	tumor susceptibility gene 101	10.8215	10.3725	10.6954	10.4758	10.5422	10.4256	10.6298	10.4812	-0.148605	0.303828	0.622552
Rpl28-ps1	ribosomal protein L28, pseudogene 1	9.91626	9.95634	9.88353	9.85713	9.58163	9.97647	9.91871	9.80508	-0.113633	0.493717	0.814981
Gm22043	predicted gene, 22043	2.2078	2.319	2.94591	2.26024	2.48795	1.99404	2.49091	2.24741	-0.243494	0.728376	0.915981
Vmn2r46	vomeronasal 2, receptor 46	1.1418	0.99817	0	1.3313	1.10598	0	0.713325	0.812426	0.0991013	0.897029	0.966369
Fbxo6	F-box protein 6	8.82484	9.33619	9.49077	9.50641	9.40405	9.48991	9.21727	9.46679	0.249522	0.259835	0.561374
4933427D06Rik	RIKEN cDNA 4933427D06 gene	0	0.99817	1.95377	0	0	0	0.983979	0	-0.983979	0.401069	0.735418
Gm28557	predicted gene 28557	2.54257	4.58145	5.06911	4.31858	4.95251	4.57734	4.06438	4.61614	0.551763	0.727291	0.915375
Map6	microtubule-associated protein 6	7.32433	8.50414	8.36027	7.90578	7.75828	7.92872	8.06292	7.86426	-0.198656	0.342735	0.673054
---	---	0	3.58161	0	2.0117	0	0	1.19387	0.670568	-0.523301	0.459295	0.792048
---	---	0	0	0	0.814054	0	1.57966	0	0.797906	0.797906	0.570379	0.867313
Usp29	ubiquitin specific peptidase 29	1.7711	3.80395	3.11496	3.5378	3.18065	4.38474	2.89667	3.70106	0.804391	0.366822	0.700163
Gm21887	predicted gene, 21887	10.7064	9.37138	9.38726	10.0449	9.47819	10.3419	9.82168	9.95498	0.133297	0.927631	0.980249
Olfr424	olfactory receptor 424	0	0	0	0	0	2.31557	0	0.771856	0.771856	0.484132	0.809585
Gm45148	predicted gene 45148	2.54257	2.9968	0	3.62903	3.18065	2.99304	1.84646	3.26757	1.42112	0.258754	0.559955
Gm44652	predicted gene 44652	1.7711	3.58161	0	0	2.75751	3.4522	1.78423	2.0699	0.285668	0.891576	0.963799
4930598N05Rik	RIKEN cDNA 4930598N05 gene	0	0	0	0	0	1.99404	0	0.664679	0.664679	0.554011	0.853566
3110009M11Rik	RIKEN cDNA 3110009M11 gene	3.56793	0	0	0	1.72461	0	1.18931	0.574869	-0.614439	0.363442	0.695859
Gm44709	predicted gene 44709	1.7711	0.99817	0.969343	1.3313	1.10598	0.996028	1.2462	1.14444	-0.101768	0.898367	0.967335
CT485612.10	---	1.1418	3.16667	0	2.96778	3.18065	3.57767	1.43616	3.24203	1.80588	0.203847	0.474749
AC124752.1	---	2.54257	0	0	0	0	1.99404	0.847525	0.664679	-0.182845	0.810888	0.933154
CT573034.4	---	1.1418	0.99817	1.54394	0	0	0	1.22797	0	-1.22797	0.296178	0.612718
AC160340.1	---	0	1.99725	1.54394	0	1.72461	1.57966	1.1804	1.10142	-0.0789738	0.893233	0.964775
AC131743.4	---	0	0	0	0	2.48795	0	0	0.829317	0.829317	0.449786	0.783455
AC091458.6	---	2.2078	0	0	0	0	0	0.735934	0	-0.735934	0.48784	0.81057
Pate3	prostate and testis expressed 3	0	0.99817	1.54394	0	0	1.99404	0.84737	0.664679	-0.182691	0.999663	0.999861
Oard1	O-acyl-ADP-ribose deacylase 1	8.81328	8.66523	8.57842	9.27706	9.21556	9.47184	8.68565	9.32149	0.635843	6.1e-05	0.000611057
Cept1	choline/ethanolaminephosphotransferase 1	9.25056	9.52382	8.85999	9.16721	9.19302	8.80263	9.21146	9.05429	-0.157172	0.426248	0.761451
Igkv4-51	immunoglobulin kappa chain variable 4-51	0	0	0	3.4404	0	0	0	1.1468	1.1468	0.174398	0.425136
CT033783.3	---	0	0.99817	0	0	0	0	0.332723	0	-0.332723	0.787905	0.927867
Gm3776	predicted gene 3776	9.21878	7.71745	8.683	5.10259	5.00523	5.31417	8.53974	5.14066	-3.39908	3.63e-21	5.47e-19
Hoxc8	homeobox C8	0	1.58252	0	0	0	0	0.527507	0	-0.527507	0.632842	0.875654
Col8a2	collagen, type VIII, alpha 2	1.7711	4.08402	3.4032	5.30981	5.00523	5.03668	3.0861	5.11724	2.03114	0.00333119	0.0183408
Gm18453	predicted gene, 18453	0	0	1.54394	0	0	0	0.514647	0	-0.514647	0.642125	0.875654
Gm7740	predicted gene 7740	1.1418	0.99817	1.95377	1.3313	0	0	1.36458	0.443766	-0.920814	0.466112	0.795654
Gm38156	predicted gene, 38156	0	1.58252	0	0	0	2.31557	0.527507	0.771856	0.244349	0.750189	0.927867
Gm45200	predicted gene 45200	0	0	0	0	1.10598	0.996028	0	0.70067	0.70067	0.642102	0.875654
Gm43654	predicted gene 43654	1.7711	0	0	0	0	0	0.590366	0	-0.590366	0.589356	0.875654
Gm43012	predicted gene 43012	2.54257	4.64034	4.46433	4.82238	5.84474	4.74723	3.88242	5.13812	1.2557	0.0807506	0.243285
C430019N01Rik	RIKEN cDNA C430019N01 gene	0	0	0	0	2.75751	0	0	0.919168	0.919168	0.362726	0.695059
Gm10030	predicted gene 10030	6.74387	3.99657	5.8698	4.61486	5.00523	5.16219	5.53674	4.92743	-0.609317	0.108889	0.303563
Gm45564	predicted gene 45564	1.7711	2.319	2.5335	2.47219	2.15619	1.99404	2.20787	2.20747	-0.000392442	0.978756	0.99083
Gm42627	predicted gene 42627	0	0	0	1.71125	0	0	0	0.570415	0.570415	0.616793	0.875654
Ubxn11	UBX domain protein 11	4.42705	6.33623	5.14918	6.57001	3.50742	5.03668	5.30415	5.03804	-0.266118	0.975945	0.989518
Crybg2	crystallin beta-gamma domain containing 2	0	4.45594	0	2.65696	0	1.99404	1.48531	1.55033	0.0650195	0.478027	0.803955
Apex2	apurinic/apyrimidinic endonuclease 2	7.66176	7.68984	7.46974	7.70551	7.62986	7.55433	7.60711	7.6299	0.0227845	0.907109	0.971488
Maged2	melanoma antigen, family D, 2	9.26478	10.6074	10.3421	9.90925	10.0702	10.1316	10.0714	10.037	-0.0344008	0.632084	0.875654
Gnl3l	guanine nucleotide binding protein-like 3 (nucleolar)-like	9.96061	9.80047	9.59452	9.76962	9.78	9.81701	9.7852	9.78888	0.0036733	0.984142	0.99352
Fgd1	FYVE, RhoGEF and PH domain containing 1	7.19962	7.40575	7.75848	8.1754	8.38893	8.33192	7.45462	8.29875	0.844131	0.000142837	0.00127484
Tsr2	TSR2 20S rRNA accumulation	9.27043	8.74118	8.59281	8.65126	8.61354	8.87471	8.86814	8.71317	-0.154973	0.415507	0.749688
Huwe1	HECT, UBA and WWE domain containing 1	12.7479	12.3498	12.5846	12.384	12.5504	12.3693	12.5607	12.4345	-0.126196	0.3785	0.712622
Hsd17b10	hydroxysteroid (17-beta) dehydrogenase 10	11.4205	10.944	11.3685	11.5664	11.4238	11.8162	11.2443	11.6022	0.35781	0.0504468	0.169537
Gm13693	predicted gene 13693	1.1418	0.99817	0.969343	0	0	0.996028	1.03644	0.332009	-0.70443	0.531421	0.841927
Hist1h2bl	histone cluster 1, H2bl	1.1418	0.99817	0.969343	1.3313	1.72461	1.57966	1.03644	1.54519	0.508751	0.591677	0.875654
Atp8b4	ATPase, class I, type 8B, member 4	8.0707	8.4142	7.27826	5.79666	4.84091	5.51578	7.92105	5.38445	-2.5366	4.83e-12	2.27e-10
Gm22056	predicted gene, 22056	0	0	0.969343	0	0	0	0.323114	0	-0.323114	0.787905	0.927867
Dusp18	dual specificity phosphatase 18	8.99825	9.66168	10.9338	9.80306	9.91184	10.3386	9.86458	10.0178	0.153239	0.922012	0.979898
Ostf1	osteoclast stimulating factor 1	10.4887	10.8005	10.4675	10.0766	9.97433	9.96072	10.5855	10.0039	-0.581659	6.03e-05	0.000604921
Gm4691	predicted gene 4691	3.83514	1.99725	3.4032	2.82072	2.75751	2.99304	3.07853	2.85709	-0.221441	0.597281	0.875654
Scgb2b15	secretoglobin, family 2B, member 15	0	0	0	0	1.10598	0	0	0.36866	0.36866	0.839626	0.933154
Gm27028	predicted gene, 27028	5.35109	4.16647	4.18928	5.10259	4.2809	4.38474	4.56894	4.58941	0.0204658	0.967635	0.988172
Gm26917	predicted gene, 26917	8.51803	8.92412	9.08279	8.85633	9.82652	10.3693	8.84165	9.68403	0.842389	0.00377877	0.0203846
Blcap	bladder cancer associated protein	10.3727	9.71059	9.94511	10.1735	10.3556	10.253	10.0095	10.2607	0.251239	0.233639	0.522048
Gm10605	predicted gene 10605	5.58665	3.4561	6.18678	4.47431	5.15273	4.51595	5.07651	4.71433	-0.362179	0.260161	0.561997
Gm15464	predicted gene 15464	0	0.99817	0	0.814054	1.10598	1.57966	0.332723	1.16657	0.833843	0.464988	0.795297
Aldh1a1	aldehyde dehydrogenase family 1, subfamily A1	10.0602	11.2377	10.6549	11.3722	9.57074	9.36927	10.6509	10.1041	-0.546865	0.649729	0.87912
Gm37371	predicted gene, 37371	0	0	0	0	0	0.996028	0	0.332009	0.332009	0.839626	0.933154
Rnf222	ring finger protein 222	2.81411	1.99725	2.75439	2.82072	4.19273	4.38474	2.52192	3.7994	1.27748	0.0584196	0.189657
Gm10029	predicted gene 10029	5.12035	5.45585	5.46296	4.8977	4.95251	5.12156	5.34639	4.99059	-0.355798	0.337728	0.666418
Tlx2	T cell leukemia, homeobox 2	0	1.58252	0	0	0	0	0.527507	0	-0.527507	0.632842	0.875654
Slc4a5	solute carrier family 4, sodium bicarbonate cotransporter, member 5	0	0	0	4.37238	0	0	0	1.45746	1.45746	0.0481913	0.163815
1110032F04Rik	RIKEN cDNA 1110032F04 gene	2.81411	2.9968	2.5335	3.4404	2.48795	3.79997	2.78147	3.24278	0.461307	0.433834	0.768121
Htra2	HtrA serine peptidase 2	9.119	9.44343	8.71295	9.29807	9.03718	9.46576	9.09179	9.267	0.175211	0.482505	0.808695
Aup1	ancient ubiquitous protein 1	10.5457	10.5671	10.5333	10.6472	10.4406	10.5695	10.5487	10.5524	0.00370396	0.953828	0.983921
Gm45292	predicted gene 45292	0	0	1.54394	1.3313	0	0	0.514647	0.443766	-0.0708806	0.940658	0.980249
Gm43188	predicted gene 43188	2.2078	0	0	0	1.10598	0	0.735934	0.36866	-0.367273	0.586596	0.875654
Gm45619	predicted gene 45619	0	0	2.5335	1.3313	1.72461	3.16286	0.8445	2.07292	1.22842	0.454394	0.788037
Gm3519	predicted gene 3519	0	1.99725	0	0	0	0	0.665751	0	-0.665751	0.529599	0.841417
E330034L11Rik	RIKEN cDNA E330034L11 gene	6.22112	5.77776	5.72053	6.20519	6.10841	5.99217	5.90647	6.10193	0.195455	0.554424	0.853898
Snora28	small nucleolar RNA, H/ACA box 28	1.1418	0.99817	0.969343	0.814054	1.10598	0.996028	1.03644	0.972021	-0.0644183	0.94473	0.980249
Gm22061	predicted gene, 22061	2.2078	0.99817	0.969343	0	0	0	1.39177	0	-1.39177	0.18917	0.450497
Gm7117	predicted pseudogene 7117	4.34377	2.58191	2.27256	4.5227	4.58791	4.51595	3.06608	4.54219	1.47611	0.0718564	0.22263
Nmral1	NmrA-like family domain containing 1	5.93848	7.36268	6.27865	6.78362	5.81552	6.1419	6.52661	6.24702	-0.279591	0.423915	0.759028
Gm24313	predicted gene, 24313	0	0	0	1.3313	1.72461	1.57966	0	1.54519	1.54519	0.174814	0.425566
Plppr1	phospholipid phosphatase related 1	0	2.58191	1.54394	0	1.72461	0	1.37528	0.574869	-0.800414	0.457082	0.791316
Iglv2	immunoglobulin lambda variable 2	0	4.08402	0	4.65882	1.72461	2.80054	1.36134	3.06132	1.69998	0.490092	0.812733
Gm22065	predicted gene, 22065	1.7711	0	2.75439	0	0	0.996028	1.5085	0.332009	-1.17649	0.191727	0.454863
Gm6505	predicted pseudogene 6505	4.50578	4.58145	4.52562	5.83549	5.75523	5.63606	4.53762	5.74226	1.20464	0.0014069	0.00890025
Gm22066	predicted gene, 22066	2.54257	2.58191	1.54394	3.10122	2.15619	2.31557	2.22281	2.52433	0.301517	0.701877	0.907166
Plekhd1	pleckstrin homology domain containing, family D (with coiled-coil domains) member 1	2.81411	2.58191	3.52825	4.5227	1.72461	2.31557	2.97476	2.85429	-0.120466	0.672858	0.887222
Gm28875	predicted gene 28875	7.07606	6.79079	7.17684	6.46249	6.20172	6.88693	7.01456	6.51705	-0.497516	0.0970758	0.278498
---	---	0	0	0	0.814054	1.10598	0.996028	0	0.972021	0.972021	0.478188	0.803955
Gm20518	predicted gene 20518	5.78909	4.45594	5.22505	6.249	5.65979	5.27765	5.15669	5.72881	0.572123	0.247327	0.543092
Cyp21a2-ps	cytochrome P450, family 21, subfamily a, polypeptide 2 pseudogene	0	2.80422	3.26627	2.65696	3.18065	0	2.02349	1.94587	-0.0776253	0.918061	0.977276
Kera	keratocan	0	0	0	0	1.72461	0	0	0.574869	0.574869	0.625351	0.875654
Mrln	myoregulin	0	1.99725	3.74989	4.26269	3.77368	3.89947	1.91572	3.97861	2.0629	0.118256	0.322549
Slc17a8	solute carrier family 17 (sodium-dependent inorganic phosphate cotransporter), member 8	0	0	2.75439	2.47219	0	0	0.918131	0.824064	-0.0940668	0.904148	0.96913
Epyc	epiphycan	3.04254	5.24436	4.89426	4.61486	5.40899	5.03668	4.39372	5.02018	0.626456	0.517379	0.838189
Gm18913	predicted gene, 18913	0	2.319	0	0	0	0	0.773	0	-0.773	0.461623	0.792048
Adamtsl3	ADAMTS-like 3	6.41717	7.93299	7.33927	7.68439	8.23188	8.0255	7.22981	7.98059	0.750777	0.0731264	0.225504
Gm36931	predicted gene, 36931	1.1418	0.99817	2.27256	0.814054	1.10598	1.99404	1.47084	1.30469	-0.166154	0.829811	0.933154
Arih2	ariadne RBR E3 ubiquitin protein ligase 2	11.2213	10.2631	11.0008	9.79815	9.99076	10.0241	10.8284	9.93767	-0.890742	5.74e-05	0.000579682
Mgat1	mannoside acetylglucosaminyltransferase 1	10.5779	10.7336	10.5435	10.9028	10.7222	10.9736	10.6183	10.8662	0.247871	0.0626351	0.200243
Rab44	RAB44, member RAS oncogene family	9.72383	7.95635	7.55305	2.82072	2.75751	3.31477	8.41108	2.96433	-5.44675	1.48e-24	3.1e-22
Zfp69	zinc finger protein 69	6.09946	5.35398	6.39817	5.71572	7.29077	6.03656	5.95054	6.34768	0.397146	0.299088	0.616215
Trim38	tripartite motif-containing 38	0	1.58252	0	2.65696	3.18065	2.57834	0.527507	2.80531	2.27781	0.0387878	0.137866
Pcdha9	protocadherin alpha 9	0	0	0	4.01461	3.50742	0	0	2.50735	2.50735	0.00561915	0.0286161
---	---	6.09946	6.48823	6.06821	6.14464	5.87338	6.07963	6.21863	6.03255	-0.186082	0.529604	0.841417
2610300M13Rik	RIKEN cDNA 2610300M13 gene	0	1.58252	0	0	0	0	0.527507	0	-0.527507	0.632842	0.875654
Gm26676	predicted gene, 26676	4.34377	3.69706	5.69408	3.62903	4.44255	2.80054	4.5783	3.62404	-0.954263	0.121798	0.329871
Gm44366	predicted gene, 44366	2.2078	0.99817	3.84913	0.814054	2.15619	2.31557	2.3517	1.76194	-0.589763	0.348698	0.679785
Zfp862-ps	zinc finger protein 862, pseudogene	8.06421	8.24428	8.06237	8.2741	8.40373	8.35839	8.12362	8.34541	0.221787	0.198013	0.465404
Gm3375	predicted gene 3375	4.84554	5.66884	5.49396	5.39025	5.72411	5.72012	5.33611	5.61149	0.275381	0.547973	0.850535
Gm44265	predicted gene, 44265	0	1.58252	0	1.3313	0	1.57966	0.527507	0.970321	0.442813	0.756887	0.927867
Phactr1	phosphatase and actin regulator 1	7.12676	7.61107	8.05199	8.38622	8.48486	8.13162	7.59661	8.33424	0.737631	0.0085914	0.0407017
Vmac	vimentin-type intermediate filament associated coiled-coil protein	7.03683	7.74455	7.66624	7.72631	7.85481	7.85006	7.48254	7.81039	0.327857	0.232093	0.519594
Lrrc8c	leucine rich repeat containing 8 family, member C	10.8234	10.2525	11.1048	10.4368	10.7572	10.1162	10.7269	10.4368	-0.290178	0.20227	0.472004
---	---	0	0	1.54394	0	0	1.57966	0.514647	0.526555	0.0119082	0.994738	0.997087
---	---	1.7711	1.58252	0	0	0	2.31557	1.11787	0.771856	-0.346018	0.951523	0.983516
---	---	0	0	0	0	0	0.996028	0	0.332009	0.332009	0.839626	0.933154
D730045B01Rik	RIKEN cDNA D730045B01 gene	2.2078	0	0.969343	1.3313	1.10598	2.31557	1.05905	1.58428	0.525234	0.72762	0.915561
Ttll7	tubulin tyrosine ligase-like family, member 7	9.43287	7.66878	9.2623	7.37084	7.19189	7.45152	8.78798	7.33808	-1.4499	1.64e-05	0.000195046
Mir6922	microRNA 6922	1.1418	0.99817	0.969343	0.814054	1.10598	0.996028	1.03644	0.972021	-0.0644183	0.94473	0.980249
Otud7a	OTU domain containing 7A	3.04254	0.99817	2.75439	0	0	1.99404	2.26504	0.664679	-1.60036	0.180974	0.436114
Cuedc2	CUE domain containing 2	10.3068	10.3047	10.2723	10.4872	10.3441	10.7217	10.2946	10.5177	0.223045	0.107094	0.299886
CT009754.1	---	2.54257	0.99817	1.54394	1.3313	1.10598	0.996028	1.69489	1.14444	-0.550459	0.494377	0.815556
AC158365.1	---	0	0	0	2.47219	0	0	0	0.824064	0.824064	0.445843	0.780084
AC157822.3	---	2.81411	5.20589	3.84913	4.47431	0	1.57966	3.95638	2.01799	-1.93838	0.294534	0.610735
---	---	1.1418	2.319	1.95377	2.26024	1.72461	2.80054	1.80486	2.2618	0.45694	0.624104	0.875654
Hikeshi	heat shock protein nuclear import factor	7.81648	8.65098	7.71967	9.19546	9.13505	9.23285	8.06238	9.18779	1.12541	3.97e-05	0.000419977
Zfp599	zinc finger protein 599	4.42705	4.75136	5.29712	3.33596	3.77368	3.89947	4.82517	3.6697	-1.15547	0.0211233	0.0845295
---	---	0	0	0	1.3313	1.10598	0	0	0.812426	0.812426	0.580513	0.875654
---	---	10.474	10.3539	8.28694	7.12661	9.45942	9.81701	9.70496	8.80101	-0.903947	0.381112	0.715937
Arf2	ADP-ribosylation factor 2	10.6812	10.1948	10.6829	9.56823	9.58813	9.69941	10.5196	9.61859	-0.901029	1.15e-07	2.32e-06
Rab3d	RAB3D, member RAS oncogene family	8.08359	9.57754	9.01762	9.26111	9.32071	9.13672	8.89292	9.23951	0.346592	0.473863	0.800453
Cdcp1	CUB domain containing protein 1	4.06051	5.77776	2.75439	5.16489	4.09882	5.07974	4.19756	4.78115	0.583594	0.833757	0.933154
Gm17084	predicted gene 17084	1.1418	0.99817	0.969343	0.814054	1.72461	0.996028	1.03644	1.17823	0.141791	0.854314	0.9415
3830432H09Rik	RIKEN cDNA 3830432H09 gene	0	0	2.27256	1.71125	0	0	0.75752	0.570415	-0.187104	0.812256	0.933154
4933400C23Rik	RIKEN cDNA 4933400C23 gene	0	0	1.54394	0	0	0	0.514647	0	-0.514647	0.642125	0.875654
Ppp4r1l-ps	protein phosphatase 4, regulatory subunit 1-like, pseudogene	7.93503	8.97934	9.02825	8.84448	8.70801	8.74361	8.64754	8.76536	0.117825	0.892283	0.964163
Gm38708	predicted gene, 38708	4.16124	2.9968	0	4.08075	4.19273	3.99254	2.38601	4.08867	1.70266	0.275763	0.584246
Gm44596	predicted gene 44596	0	0	0	0	2.98454	0	0	0.994846	0.994846	0.295515	0.611847
Gm44380	predicted gene, 44380	0	0	0	0.814054	0	0.996028	0	0.603361	0.603361	0.6901	0.898033
Gm32591	predicted gene, 32591	0	2.80422	1.95377	4.14398	4.19273	3.31477	1.58599	3.88383	2.29783	0.0173048	0.0722247
Gm26510	predicted gene, 26510	5.16954	5.28183	5.93901	5.58511	5.28655	6.16208	5.46346	5.67791	0.21445	0.60137	0.875654
Gm26511	predicted gene, 26511	0	2.9968	1.95377	0	0	0	1.65019	0	-1.65019	0.0836051	0.249636
Gm3764	predicted gene 3764	2.2078	0	0	0	0	2.57834	0.735934	0.859446	0.123512	0.860059	0.945734
Gm26512	predicted gene, 26512	0	1.99725	0	2.0117	2.15619	0	0.665751	1.3893	0.723545	0.61807	0.875654
Gm26513	predicted gene, 26513	2.81411	3.58161	4.11146	3.5378	3.35327	4.63622	3.50239	3.84243	0.340037	0.594113	0.875654
Cntfr	ciliary neurotrophic factor receptor	6.53449	6.51994	7.37301	8.02815	7.54338	7.75363	6.80915	7.77505	0.965906	0.00237164	0.0137986
Enho	energy homeostasis associated	5.82023	5.42269	6.31382	7.22493	6.66197	6.86248	5.85225	6.91646	1.06421	0.00209707	0.012457
AC154734.1	---	0	3.16667	0	5.0704	0	1.57966	1.05556	2.21669	1.16113	0.516727	0.838189
Mtmr2	myotubularin related protein 2	10.2278	9.73949	10.3272	9.27883	9.51274	9.27283	10.0981	9.3548	-0.743339	7e-05	0.000687958
Tmed6	transmembrane p24 trafficking protein 6	0	1.58252	2.27256	0	0	0	1.28503	0	-1.28503	0.231567	0.519217
AC121961.1	---	2.81411	1.58252	1.95377	0	2.15619	2.57834	2.1168	1.57817	-0.538624	0.774744	0.927867
AC153504.1	---	5.43396	5.58138	4.46433	5.46644	5.48521	5.79954	5.15989	5.58373	0.42384	0.397222	0.731018
AC153532.2	---	2.2078	0.99817	0.969343	0.814054	0	0	1.39177	0.271351	-1.12042	0.28723	0.600274
AC158398.1	---	0	0	0	0	1.72461	0	0	0.574869	0.574869	0.625351	0.875654
Cog8	component of oligomeric golgi complex 8	9.62809	9.90473	9.40163	10.2091	10.2352	10.3027	9.64482	10.249	0.604165	0.000353432	0.00275446
Nip7	NIP7, nucleolar pre-rRNA processing protein	10.4128	9.38436	9.55465	8.37309	8.25383	8.41833	9.78394	8.34842	-1.43552	1.77e-08	4.29e-07
Has3	hyaluronan synthase 3	4.42705	5.51998	4.11146	5.98112	7.03592	6.33199	4.68616	6.44968	1.76352	0.000417531	0.00316302
Vps4a	vacuolar protein sorting 4A	10.8613	10.4832	10.8184	10.6668	10.8779	10.7174	10.721	10.7541	0.033083	0.864699	0.947569
Gm5105	predicted gene 5105	0	2.319	1.54394	4.31858	4.89779	4.16241	1.28765	4.45959	3.17195	0.000141159	0.00126173
Lrrc56	leucine rich repeat containing 56	5.51232	6.71062	6.9272	7.23222	6.87526	7.2305	6.38338	7.11266	0.729281	0.0967503	0.277932
Slc13a2	solute carrier family 13 (sodium-dependent dicarboxylate transporter), member 2	0	5.64027	0	4.42424	0	0	1.88009	1.47475	-0.405341	0.738144	0.922012
Degs1	delta(4)-desaturase, sphingolipid 1	11.2973	10.8613	11.1919	10.5278	10.3956	10.578	11.1168	10.5005	-0.616378	6.47e-05	0.000642908
Pzp	pregnancy zone protein	3.95222	1.58252	2.27256	5.44149	5.84474	5.60692	2.60244	5.63105	3.02861	8.62e-06	0.000110196
Fkbp4	FK506 binding protein 4	11.7732	11.5485	11.2857	13.2919	13.2855	13.3512	11.5358	13.3095	1.77376	6.4e-29	2.2e-26
Tspan11	tetraspanin 11	3.70771	6.06248	5.58314	5.91014	5.15273	5.38455	5.11778	5.48248	0.364697	0.855207	0.942006
Tead4	TEA domain family member 4	8.54157	7.38868	8.11316	6.93432	7.08573	6.72004	8.01447	6.91336	-1.10111	0.000176922	0.00153388
Tspan9	tetraspanin 9	11.508	11.8033	12.0228	11.3975	11.4436	11.4282	11.7781	11.4231	-0.354919	0.020664	0.0830757
Gm43661	predicted gene 43661	0	1.58252	0	0	1.10598	0	0.527507	0.36866	-0.158847	0.79952	0.933154
Gm42979	predicted gene 42979	5.12035	4.69692	4.58441	4.65882	5.81552	4.07998	4.80056	4.85144	0.0508791	0.699718	0.905907
2310009A05Rik	RIKEN cDNA 2310009A05 gene	5.16954	6.45581	4.98433	6.94323	7.07344	6.29593	5.53656	6.77087	1.2343	0.0130301	0.0575881
Pnldc1	poly(A)-specific ribonuclease (PARN)-like domain containing 1	3.2397	4.75136	4.11146	4.01461	4.36399	4.16241	4.03417	4.18034	0.146165	0.984278	0.993557
Sft2d1	SFT2 domain containing 1	8.24721	8.73781	8.13791	8.39275	8.27546	8.51954	8.37431	8.39592	0.0216062	0.997789	0.998805
Gm22075	predicted gene, 22075	0	0.99817	0.969343	0	1.72461	0	0.655838	0.574869	-0.0809682	0.958676	0.986241
Nckap5	NCK-associated protein 5	5.78909	5.95059	5.89324	6.21994	7.25855	6.91097	5.87764	6.79649	0.918849	0.0050576	0.0261074
Gm43263	predicted gene 43263	3.41313	2.319	3.4032	2.82072	0	1.99404	3.04511	1.60492	-1.44019	0.241731	0.534181
Fbxo33	F-box protein 33	8.02465	7.67584	8.33909	7.07886	7.09792	7.07957	8.01319	7.08545	-0.927743	6.65e-05	0.00065791
Sec31a	Sec31 homolog A (S. cerevisiae)	12.0717	12.0194	12.1638	11.9259	11.9913	11.9765	12.085	11.9646	-0.120416	0.275536	0.584091
Zfp992	zinc finger protein 992	6.55314	7.54325	7.00458	6.7124	6.81747	6.53129	7.03366	6.68705	-0.346606	0.199075	0.466882
Neb	nebulin	6.91229	6.93888	7.09833	7.33063	7.49811	7.8869	6.98317	7.57188	0.588711	0.0139424	0.0608042
Txnrd2	thioredoxin reductase 2	9.02523	9.06781	8.94096	9.6399	9.58163	9.79295	9.01133	9.6715	0.660165	2.81e-06	4.11e-05
Dio3	deiodinase, iodothyronine type III	4.25539	4.16647	3.4032	2.82072	0	0	3.94168	0.940241	-3.00144	0.0151613	0.0650713
Gpx4	glutathione peroxidase 4	13.4494	12.9861	13.3287	13.5557	13.3565	13.7861	13.2547	13.5661	0.311339	0.0894463	0.2625
Selenos	selenoprotein S	9.88346	9.87286	10.1705	9.3119	9.17299	9.51366	9.97561	9.33285	-0.642755	9.37e-05	0.000889293
Ogfod2	2-oxoglutarate and iron-dependent oxygenase domain containing 2	7.67885	7.81653	8.47735	8.46881	8.29676	8.57327	7.99091	8.44628	0.45537	0.0968848	0.278213
Uap1l1	UDP-N-acteylglucosamine pyrophosphorylase 1-like 1	7.26898	8.74454	7.69986	7.95068	7.59589	8.13162	7.90446	7.89273	-0.0117283	0.709801	0.909308
Selenom	selenoprotein M	8.59657	9.79238	9.3769	9.94741	9.7781	9.93896	9.25528	9.88816	0.632873	0.0378167	0.135176
Dpp7	dipeptidylpeptidase 7	7.03683	7.71745	7.26933	7.70026	7.49811	7.62144	7.3412	7.6066	0.265399	0.334281	0.662383
Grin1	glutamate receptor, ionotropic, NMDA1 (zeta 1)	0	0	2.75439	1.71125	0	1.99404	0.918131	1.23509	0.316963	0.950823	0.983139
Gm45051	predicted gene 45051	4.42705	1.99725	3.94197	3.10122	2.75751	3.6931	3.45542	3.18394	-0.271483	0.490708	0.813059
St8sia3	ST8 alpha-N-acetyl-neuraminide alpha-2,8-sialyltransferase 3	0	0	2.5335	0	0	0	0.8445	0	-0.8445	0.406617	0.740795
Fam89a	family with sequence similarity 89, member A	6.12463	5.16636	5.58314	6.11339	5.65979	5.74708	5.62471	5.84009	0.215377	0.624796	0.875654
Tmem18	transmembrane protein 18	8.52749	8.75123	8.45389	8.76122	8.98235	8.93751	8.57754	8.89369	0.316152	0.0648573	0.205741
Spice1	spindle and centriole associated protein 1	6.35474	7.81014	5.74651	8.59862	8.6471	8.41413	6.63713	8.55329	1.91616	0.000126524	0.00115137
Dpy19l1	dpy-19-like 1 (C. elegans)	8.52749	9.27943	9.10555	8.45017	8.56607	8.20153	8.97082	8.40592	-0.564903	0.0103702	0.0475027
Klk13	kallikrein related-peptidase 13	1.7711	6.01876	3.64332	3.33596	2.75751	0	3.81106	2.03116	-1.77991	0.0436796	0.151573
Laptm4b	lysosomal-associated protein transmembrane 4B	9.33923	9.5888	9.21425	10.3211	10.196	10.4576	9.38076	10.3249	0.944149	3.48e-09	9.81e-08
Mtdh	metadherin	11.6173	10.8828	11.3918	10.5196	10.7744	10.7097	11.2973	10.6679	-0.629382	0.00104078	0.00688873
Cdc7	cell division cycle 7 (S. cerevisiae)	6.39666	7.18619	5.18761	6.1291	5.4476	5.82508	6.25682	5.80059	-0.456227	0.190436	0.452544
Amtn	amelotin	3.04254	0	0	0	1.72461	1.57966	1.01418	1.10142	0.0872436	0.730589	0.91732
Atp6ap2	ATPase, H+ transporting, lysosomal accessory protein 2	9.63904	9.85898	9.75027	9.1748	9.01806	9.15948	9.74943	9.11745	-0.631984	8.16e-06	0.000105235
Gm128	predicted gene 128	0	0	3.26627	1.3313	0	2.57834	1.08876	1.30321	0.214456	0.83671	0.933154
Vps53	VPS53 GARP complex subunit	9.63248	9.75123	9.54543	9.30845	9.3233	9.47386	9.64305	9.36854	-0.274508	0.0504649	0.169537
Ppp1r8	protein phosphatase 1, regulatory (inhibitor) subunit 8	9.77041	9.46598	9.42394	9.31877	9.27581	9.23046	9.55345	9.27502	-0.278431	0.0678732	0.213188
Sema3a	sema domain, immunoglobulin domain (Ig), short basic domain, secreted, (semaphorin) 3A	7.73712	7.02979	7.81481	6.03215	6.26794	5.66463	7.52724	5.98824	-1.539	6.79e-07	1.16e-05
Rpa2	replication protein A2	8.76608	8.67934	8.80234	8.23833	8.47087	8.57703	8.74925	8.42874	-0.320512	0.0624392	0.199765
Smpdl3b	sphingomyelin phosphodiesterase, acid-like 3B	6.9965	6.98505	6.77147	5.75676	5.59247	5.66463	6.91767	5.67129	-1.24639	6e-06	8e-05
Eya3	EYA transcriptional coactivator and phosphatase 3	9.5373	9.59626	9.53987	9.7545	9.94426	9.7063	9.55781	9.80169	0.243881	0.0707766	0.22008
Gm22079	predicted gene, 22079	0	0.99817	1.54394	2.0117	2.98454	0.996028	0.84737	1.99742	1.15005	0.248379	0.544898
Yrdc	yrdC domain containing (E.coli)	9.99172	8.80692	9.52494	8.0365	7.76594	7.98643	9.44119	7.92962	-1.51157	1.86e-08	4.49e-07
Zyg11b	zyg-ll family member B, cell cycle regulator	10.4995	9.79562	10.5774	10.0103	10.272	10.343	10.2908	10.2084	-0.0824397	0.598657	0.875654
Gm22082	predicted gene, 22082	1.7711	0	1.95377	0	1.10598	1.57966	1.24162	0.895215	-0.346407	0.698733	0.905148
Ly6d	lymphocyte antigen 6 complex, locus D	3.04254	5.69685	2.27256	6.14464	0	4.38474	3.67065	3.5098	-0.160854	0.774672	0.927867
Gm36936	predicted gene, 36936	3.41313	3.58161	3.64332	3.33596	4.84091	4.24039	3.54602	4.13909	0.593068	0.253808	0.552329
Gm36937	predicted gene, 36937	0	0	0	0	0	1.57966	0	0.526555	0.526555	0.659841	0.87912
Gm36938	predicted gene, 36938	0	0	3.84913	0	0	0	1.28304	0	-1.28304	0.0937383	0.271571
A430110C17Rik	RIKEN cDNA A430110C17 gene	0	0	1.95377	0	0	1.99404	0.651255	0.664679	0.0134239	0.993019	0.997087
4933424G06Rik	RIKEN cDNA 4933424G06 gene	0	2.58191	2.75439	0.814054	0	1.57966	1.77877	0.797906	-0.980862	0.265818	0.570484
Rimbp2	RIMS binding protein 2	1.7711	0	1.95377	1.71125	0	0	1.24162	0.570415	-0.671206	0.632491	0.875654
Rsrc2	arginine/serine-rich coiled-coil 2	11.1618	10.6166	10.4449	10.5129	10.7173	10.6187	10.7411	10.6163	-0.124773	0.440111	0.774977
Zcchc8	zinc finger, CCHC domain containing 8	9.56514	9.57188	9.642	9.55956	9.73388	9.61776	9.59301	9.63707	0.0440614	0.736357	0.921085
Scarb2	scavenger receptor class B, member 2	12.6483	12.0914	12.5805	12.0595	11.986	12.1763	12.4401	12.074	-0.366141	0.030418	0.113691
Stx2	syntaxin 2	8.35746	9.51794	9.11804	9.66706	9.56636	9.38007	8.99782	9.53783	0.540017	0.0813251	0.244565
Kcnh8	potassium voltage-gated channel, subfamily H (eag-related), member 8	0	0	0	0	3.35327	2.99304	0	2.11544	2.11544	0.0282298	0.107098
Tsen34	tRNA splicing endonuclease subunit 34	9.4379	9.93151	9.6368	10.2165	10.1382	10.2751	9.66874	10.2099	0.541201	0.00143223	0.00902322
Alox5	arachidonate 5-lipoxygenase	9.02523	8.74789	8.62117	8.57013	8.22634	8.35839	8.79809	8.38495	-0.413141	0.0311233	0.115758
2023-03-08	membrane-associated ring finger (C3HC4) 8	9.82325	10.1101	10.2281	10.1707	10.2255	10.2565	10.0538	10.2176	0.163759	0.308447	0.629038
Hrh2	histamine receptor H2	6.19759	7.34509	6.14833	5.56215	6.26794	5.87482	6.56367	5.90164	-0.662032	0.0699754	0.218141
Parm1	prostate androgen-regulated mucin-like protein 1	11.8698	11.0325	11.3643	11.1875	11.3486	11.3616	11.4222	11.2993	-0.122937	0.4458	0.780084
Rad17	RAD17 checkpoint clamp loader component	9.67781	8.9907	9.28463	8.91642	9.19302	9.10058	9.31771	9.07001	-0.247709	0.193849	0.458607
Marveld2	MARVEL (membrane-associating) domain containing 2	5.62243	5.28183	5.5243	4.14398	4.36399	4.99229	5.47619	4.50009	-0.976099	0.028537	0.108088
Cd59a	CD59a antigen	10.8725	10.1899	11.0348	10.5629	11.0903	10.9346	10.6991	10.8626	0.163554	0.56338	0.861736
Ocln	occludin	5.51232	5.35398	5.58314	5.22462	4.84091	4.74723	5.48315	4.93758	-0.545564	0.171671	0.420586
Gtf2h2	general transcription factor II H, polypeptide 2	7.9632	8.66877	8.46957	8.23833	8.40373	8.44328	8.36718	8.36178	-0.00540466	0.873806	0.953308
Prorsd1	prolyl-tRNA synthetase domain containing 1	8.10272	8.05705	7.75208	8.00279	8.2374	8.0033	7.97062	8.08116	0.110548	0.589539	0.875654
Traip	TRAF-interacting protein	5.90982	5.51998	6.36502	4.61486	4.44255	4.31437	5.93161	4.45726	-1.47435	0.000247475	0.00204158
Nlrc5	NLR family, CARD domain containing 5	8.68804	8.92412	7.90982	9.36263	8.60074	8.65028	8.50733	8.87122	0.363889	0.247874	0.544026
Rbm6	RNA binding motif protein 6	10.8772	10.3659	10.3282	10.4665	10.6506	10.3972	10.5238	10.5048	-0.0189982	0.841728	0.934427
Mon1a	MON1 homolog A, secretory traffciking associated	9.12836	8.4268	7.63181	8.61266	8.48022	8.59198	8.39566	8.56162	0.165962	0.891596	0.963799
Rbm5	RNA binding motif protein 5	11.6146	11.2881	11.4508	11.5232	11.5175	11.1819	11.4511	11.4075	-0.0435961	0.796238	0.933154
CT025665.1	---	1.7711	0	0	0	0	0	0.590366	0	-0.590366	0.589356	0.875654
Zfp976	zinc finger protein 976	6.92667	6.53554	6.2426	6.72279	6.84665	6.65034	6.56827	6.73993	0.171657	0.597106	0.875654
Bsn	bassoon	3.83514	3.90347	2.94591	1.71125	2.98454	3.57767	3.56151	2.75782	-0.803692	0.349873	0.680321
Gm13609	predicted gene 13609	0	0	1.54394	0	0	0	0.514647	0	-0.514647	0.642125	0.875654
Foxn4	forkhead box N4	0	2.319	0	0	0	0	0.773	0	-0.773	0.461623	0.792048
Cd109	CD109 antigen	5.43396	6.96215	7.05742	6.62645	6.45012	6.34969	6.48451	6.47542	-0.00908733	0.677413	0.890622
Kcng3	potassium voltage-gated channel, subfamily G, member 3	0	0	1.95377	0	0	0	0.651255	0	-0.651255	0.538612	0.843174
AC113282.2	---	0	2.58191	0.969343	2.0117	1.10598	3.16286	1.18375	2.09351	0.909762	0.494825	0.815574
CT025639.2	---	3.2397	3.31863	0	3.10122	2.15619	3.79997	2.18611	3.01913	0.833015	0.667325	0.884884
AC131687.1	---	7.23472	5.90329	7.38959	4.37238	5.05609	4.24039	6.84253	4.55629	-2.28625	2.43e-07	4.59e-06
AC154354.1	---	0	1.58252	0	0	0	0	0.527507	0	-0.527507	0.632842	0.875654
Polr3e	polymerase (RNA) III (DNA directed) polypeptide E	9.92165	9.16376	9.52869	8.71772	8.44725	8.56192	9.53804	8.57563	-0.962405	6.32e-06	8.39e-05
---	---	1.1418	1.99725	0	0.814054	1.10598	0	1.04635	0.640012	-0.406341	0.619376	0.875654
Gm13556	predicted gene 13556	1.1418	0	0	0.814054	0	1.57966	0.380602	0.797906	0.417304	0.663521	0.882045
Gm14341	predicted gene 14341	0	0	0	0	1.72461	0	0	0.574869	0.574869	0.625351	0.875654
Gm15866	predicted gene 15866	2.2078	0	2.5335	0	2.15619	0	1.58043	0.718729	-0.861704	0.521275	0.83825
Tesk2	testis-specific kinase 2	6.02122	6.95056	6.2426	6.35969	6.83213	6.78653	6.40479	6.65945	0.254657	0.543059	0.847629
Dnah17	dynein, axonemal, heavy chain 17	7.63573	6.30017	7.47752	5.8733	5.52186	5.60692	7.13781	5.66736	-1.47045	5.13e-05	0.000524741
Gria2	glutamate receptor, ionotropic, AMPA2 (alpha 2)	0	2.319	0	0	0	0	0.773	0	-0.773	0.461623	0.792048
Coil	coilin	7.68732	7.23477	6.80893	7.39053	7.35311	7.61414	7.24367	7.45259	0.208922	0.531029	0.841927
Gm12953	predicted gene 12953	4.25539	4.08402	3.64332	4.7832	5.10522	5.38455	3.99424	5.09099	1.09675	0.020239	0.0816487
Gm22085	predicted gene, 22085	0	0	0	0	1.10598	0	0	0.36866	0.36866	0.839626	0.933154
Pdzd9	PDZ domain containing 9	4.34377	3.16667	3.52825	3.5378	4.58791	4.31437	3.67956	4.14669	0.467128	0.461374	0.792048
Gm22089	predicted gene, 22089	0	0	0.969343	0	0	0	0.323114	0	-0.323114	0.787905	0.927867
Gm13084	predicted gene 13084	0	1.99725	0	0	0	0	0.665751	0	-0.665751	0.529599	0.841417
Ap4s1	adaptor-related protein complex AP-4, sigma 1	9.7744	9.33619	9.52119	9.8201	9.89098	10.1149	9.54392	9.94199	0.39806	0.0216582	0.0863507
Gm15856	predicted gene 15856	4.42705	3.31863	1.95377	5.03747	5.78569	5.4185	3.23315	5.41389	2.18074	0.00198578	0.0118986
Rsbn1	rosbin, round spermatid basic protein 1	9.05498	8.07317	9.00423	8.00279	8.72775	8.38867	8.71079	8.37307	-0.337723	0.205749	0.477784
Pabpc1l2a-ps	poly(A) binding protein, cytoplasmic 1-like 2A, pseudogene	2.81411	1.99725	1.95377	3.33596	2.75751	2.80054	2.25504	2.96467	0.709625	0.361333	0.694058
Gm4473	predicted gene 4473	0	1.99725	1.54394	2.47219	2.75751	2.80054	1.1804	2.67675	1.49635	0.172292	0.421733
C130050O18Rik	RIKEN cDNA C130050O18 gene	6.67739	6.64023	5.8698	4.65882	4.19273	4.31437	6.39581	4.38864	-2.00717	4.34e-07	7.74e-06
Acss2os	acyl-CoA synthetase short-chain family member 2, opposite strand	1.7711	0.99817	0	1.3313	1.10598	0	0.92309	0.812426	-0.110663	0.893695	0.964797
Gm15731	predicted gene 15731	0	0	1.54394	0	0	0	0.514647	0	-0.514647	0.642125	0.875654
---	---	2.2078	1.99725	1.95377	0	0	0	2.05294	0	-2.05294	0.0420329	0.146901
---	---	0	0	0	1.3313	2.48795	0	0	1.27308	1.27308	0.240354	0.532167
---	---	0	1.58252	1.54394	0	2.15619	1.57966	1.04215	1.24528	0.20313	0.832701	0.933154
---	---	6.24426	5.24436	4.40033	5.51509	4.2809	2.80054	5.29632	4.19884	-1.09748	0.208469	0.482743
Wipf1	WAS/WASL interacting protein family, member 1	9.86492	10.1308	10.2498	9.39223	9.72997	9.50973	10.0818	9.54397	-0.53786	0.00124809	0.00803963
Gm1968	predicted gene 1968	0	0	3.4032	0	0	0	1.1344	0	-1.1344	0.168573	0.415313
Carns1	carnosine synthase 1	8.97076	10.0489	9.46949	10.547	10.7034	10.9094	9.49638	10.7199	1.22355	4.3e-06	5.99e-05
Scyl1	SCY1-like 1 (S. cerevisiae)	11.0398	10.9182	10.9913	11.086	10.9545	11.1045	10.9831	11.0483	0.0652425	0.570422	0.867313
Ltbp3	latent transforming growth factor beta binding protein 3	10.4556	11.1146	10.8184	11.3239	10.8565	11.0669	10.7962	11.0824	0.286235	0.17758	0.430089
Smc5	structural maintenance of chromosomes 5	9.701	9.23475	9.90963	9.01061	9.09912	9.08482	9.61513	9.06485	-0.550276	0.00361723	0.0196602
Capn1	calpain 1	9.46771	9.92264	9.54913	9.82734	9.86447	9.79457	9.64649	9.82879	0.182303	0.309828	0.631066
Arl2	ADP-ribosylation factor-like 2	9.97105	9.69678	9.7694	10.0071	9.84471	10.3252	9.81241	10.059	0.246592	0.139816	0.363685
Men1	multiple endocrine neoplasia 1	8.91415	8.95635	8.71952	9.11293	8.96249	8.93164	8.86334	9.00235	0.139013	0.373005	0.706843
Mapk8	mitogen-activated protein kinase 8	9.89995	9.36048	9.56928	9.36595	9.66796	9.3736	9.6099	9.46917	-0.140735	0.425206	0.760302
Sf1	splicing factor 1	12.2974	11.6727	12.2809	11.7322	11.5959	11.7284	12.0837	11.6855	-0.39818	0.0252685	0.097873
Map4k2	mitogen-activated protein kinase kinase kinase kinase 2	10.3232	10.1874	10.813	11.1936	11.1697	11.0282	10.4412	11.1305	0.689278	0.000360742	0.00279845
Gm765	predicted gene 765	0	1.99725	0	0	1.72461	2.31557	0.665751	1.34673	0.680974	0.647268	0.87912
Gm42533	predicted gene 42533	0	0.99817	1.95377	0	1.10598	0.996028	0.983979	0.70067	-0.283309	0.686074	0.897058
Seh1l	SEH1-like (S. cerevisiae	10.9476	10.155	10.38	9.59535	9.84471	9.8186	10.4942	9.75289	-0.741286	0.000340307	0.00266726
Gucy1b2	guanylate cyclase 1, soluble, beta 2	0	1.58252	1.54394	3.5378	0	2.31557	1.04215	1.95112	0.908967	0.2456	0.540327
Uqcr10	ubiquinol-cytochrome c reductase, complex III subunit X	12.3774	12.1448	12.4218	13.0787	12.7948	13.1671	12.3147	13.0135	0.698855	7.8e-06	0.000101047
Rnaseh2b	ribonuclease H2, subunit B	8.46482	8.28175	8.31325	7.68439	8.06186	7.68557	8.35328	7.81061	-0.542666	0.00621454	0.0310328
Gm14167	predicted gene 14167	3.41313	3.16667	4.18928	3.10122	1.72461	2.99304	3.58969	2.60629	-0.983401	0.203357	0.473828
Kctd14	potassium channel tetramerisation domain containing 14	3.04254	4.31845	1.54394	4.7832	3.50742	3.79997	2.96831	4.0302	1.06189	0.32335	0.648535
Kcnf1	potassium voltage-gated channel, subfamily F, member 1	1.7711	5.9964	2.75439	0	0	0	3.5073	0	-3.5073	2.68e-05	0.000300537
Wdcp	WD repeat and coiled coil containing	7.72894	7.57379	7.13812	8.14481	8.1108	8.26353	7.48028	8.17305	0.692766	0.00208702	0.012405
Gm13112	predicted gene 13112	0	0	0	1.71125	0	0	0	0.570415	0.570415	0.616793	0.875654
Rpl31-ps13	ribosomal protein L31, pseudogene 13	2.2078	1.99725	1.54394	1.3313	0	0.996028	1.91633	0.775775	-1.14056	0.300862	0.618271
Gm16323	predicted gene 16323	6.57156	3.69706	4.33335	4.65882	3.77368	3.16286	4.86732	3.86512	-1.00221	0.066743	0.210336
Tmem145	transmembrane protein 145	1.7711	0	0	0	0	0	0.590366	0	-0.590366	0.589356	0.875654
Ankrd39	ankyrin repeat domain 39	7.49808	7.75791	7.97718	8.07757	8.26469	8.03647	7.74439	8.12624	0.381854	0.0759154	0.232331
4930563D23Rik	RIKEN cDNA 4930563D23 gene	1.7711	0	1.95377	2.47219	3.35327	0	1.24162	1.94182	0.700199	0.391505	0.724651
Gm13310	predicted gene 13310	1.7711	0	0	0	0	0	0.590366	0	-0.590366	0.589356	0.875654
Pcyt1a	phosphate cytidylyltransferase 1, choline, alpha isoform	10.8311	11.0104	11.177	10.9779	11.1639	11.1831	11.0062	11.1083	0.102146	0.50171	0.822325
Gm44314	predicted gene, 44314	0	0	0	0	0	0.996028	0	0.332009	0.332009	0.839626	0.933154
Eif4g2	eukaryotic translation initiation factor 4, gamma 2	14.7912	14.0576	14.3223	14.0478	14.3073	14.1351	14.3903	14.1634	-0.226942	0.222266	0.505133
Mrvi1	MRV integration site 1	8.44498	8.59254	8.47735	9.69768	9.51047	9.58264	8.50496	9.59693	1.09197	7.88e-14	4.86e-12
Gad1-ps	glutamate decarboxylase 1, pseudogene	3.04254	5.20589	1.54394	0	2.48795	1.57966	3.26412	1.35587	-1.90825	0.0270052	0.103293
Wbscr28	Williams-Beuren syndrome chromosome region 28 (human)	0	0	0	0	1.72461	0	0	0.574869	0.574869	0.625351	0.875654
Rundc3b	RUN domain containing 3B	5.39312	4.24446	5.79709	3.5378	2.98454	4.38474	5.14489	3.63569	-1.5092	0.010337	0.0473921
Mblac2	metallo-beta-lactamase domain containing 2	4.25539	6.3887	6.26074	6.88889	7.07344	7.15197	5.63494	7.0381	1.40316	0.014899	0.0641637
Nhlrc1	NHL repeat containing 1	6.47702	6.50417	6.39817	7.46671	7.23667	7.63594	6.45979	7.44644	0.986651	3.56e-05	0.000384485
Gm15182	predicted gene 15182	0	0	1.95377	0	0	0	0.651255	0	-0.651255	0.538612	0.843174
Csl	citrate synthase like	1.1418	0	0	1.71125	0	1.57966	0.380602	1.09697	0.716368	0.458665	0.792048
Gm37785	predicted gene, 37785	2.2078	2.80422	3.4032	1.71125	3.18065	0	2.80507	1.63063	-1.17444	0.434766	0.76905
Slamf9	SLAM family member 9	5.47367	8.06244	6.80893	7.11876	6.86103	6.93462	6.78168	6.97147	0.18979	0.740175	0.922296
Gm37716	predicted gene, 37716	1.7711	2.319	1.95377	2.0117	0	0.996028	2.01462	1.00258	-1.01204	0.452103	0.785559
Gm29591	predicted gene 29591	0	0	0.969343	0	0	0	0.323114	0	-0.323114	0.787905	0.927867
Tagln2	transgelin 2	11.897	12.5464	11.9848	11.6875	11.5764	11.2287	12.1427	11.4975	-0.645219	0.00178202	0.0108515
Cfap45	cilia and flagella associated protein 45	6.07385	7.17627	6.2426	6.16002	4.71995	4.45184	6.49757	5.1106	-1.38697	0.0163661	0.0691356
Dusp23	dual specificity phosphatase 23	7.38807	7.44757	7.10838	8.4439	8.36391	8.52734	7.31468	8.44505	1.13037	5e-09	1.36e-07
Nkapl	NFKB activating protein-like	3.70771	3.90347	3.74989	3.87249	3.64668	4.38474	3.78703	3.96797	0.180948	0.700627	0.906323
Gm5644	predicted gene 5644	0	2.80422	1.95377	2.26024	2.15619	1.99404	1.58599	2.13682	0.550829	0.886181	0.960756
Gm17110	predicted gene 17110	0	0	1.54394	0	1.10598	0	0.514647	0.36866	-0.145986	0.8113	0.933154
Gm43372	predicted gene 43372	2.81411	3.58161	3.11496	2.65696	1.10598	3.4522	3.17023	2.40505	-0.76518	0.530286	0.841927
Comt	catechol-O-methyltransferase	12.597	11.537	11.4249	11.4324	11.1733	11.6054	11.8529	11.4037	-0.44927	0.0621225	0.199067
F730035P03Rik	RIKEN cDNA F730035P03 gene	0	1.58252	0	0	0	0	0.527507	0	-0.527507	0.632842	0.875654
Mir7664	microRNA 7664	1.1418	0.99817	1.54394	1.3313	1.10598	0	1.22797	0.812426	-0.415545	0.755349	0.927867
Cp	ceruloplasmin	12.6334	12.0671	12.3381	11.4177	11.5991	11.7436	12.3462	11.5868	-0.759417	2.09e-05	0.000241023
Atp1a4	ATPase, Na+/K+ transporting, alpha 4 polypeptide	0	0	3.84913	0	0	1.99404	1.28304	0.664679	-0.618363	0.358119	0.689939
Gm27271	predicted gene, 27271	0	0	0.969343	0	0	0	0.323114	0	-0.323114	0.787905	0.927867
Mir6966	microRNA 6966	1.1418	0.99817	0.969343	0.814054	1.10598	0.996028	1.03644	0.972021	-0.0644183	0.94473	0.980249
Mir7087	microRNA 7087	1.7711	0.99817	2.27256	2.0117	1.10598	0.996028	1.68061	1.37124	-0.309372	0.757924	0.927867
---	---	0	2.319	0	1.71125	0	0	0.773	0.570415	-0.202585	0.7979	0.933154
Mir7048	microRNA 7048	1.1418	0.99817	1.54394	1.3313	0	0.996028	1.22797	0.775775	-0.452196	0.737581	0.921741
5830468F06Rik	RIKEN cDNA 5830468F06 gene	1.7711	0	0	0	0	0	0.590366	0	-0.590366	0.589356	0.875654
Vis1	viral integration site 1	0	2.9968	1.54394	3.10122	2.48795	2.80054	1.51358	2.79657	1.28299	0.391536	0.724651
---	---	0	1.58252	0	0	0	0	0.527507	0	-0.527507	0.632842	0.875654
Gm12504	predicted pseudogene 12504	3.95222	1.99725	3.84913	3.62903	3.18065	1.99404	3.2662	2.93457	-0.33163	0.615105	0.875654
Gm11702	predicted gene 11702	0	0	0.969343	0	1.10598	0.996028	0.323114	0.70067	0.377555	0.78465	0.927867
Gm8317	predicted gene 8317	0	0	0	0	0	0.996028	0	0.332009	0.332009	0.839626	0.933154
Gm14846	predicted gene 14846	0	0.99817	0	0	2.48795	0	0.332723	0.829317	0.496594	0.524386	0.841106
---	---	1.1418	0	0	0	0	0	0.380602	0	-0.380602	0.787905	0.927867
Gm13232	predicted gene 13232	1.1418	1.58252	1.54394	1.3313	1.10598	1.57966	1.42276	1.33898	-0.0837745	0.926771	0.980249
Arid2	AT rich interactive domain 2 (ARID, RFX-like)	10.0272	9.3539	10.1365	9.12865	9.27313	9.27515	9.8392	9.22564	-0.613558	0.00277733	0.0157772
Rab34	RAB34, member RAS oncogene family	9.45288	9.01315	9.35174	8.28816	8.04308	8.30041	9.27259	8.21055	-1.06204	1.09e-08	2.79e-07
Unc119	unc-119 lipid binding chaperone	6.83816	7.26315	6.55338	7.2176	6.7104	6.56198	6.8849	6.83	-0.0548998	0.868036	0.949784
B020004C17Rik	RIKEN cDNA B020004C17 gene	0	0	0	0	0	1.57966	0	0.526555	0.526555	0.659841	0.87912
Spag5	sperm associated antigen 5	3.41313	6.31831	5.02734	4.8977	4.71995	4.31437	4.91959	4.64401	-0.275588	0.288384	0.602065
Supt6	suppressor of Ty 6	11.4815	10.9992	11.5361	10.7242	10.8556	10.7293	11.3389	10.7697	-0.569187	0.000665316	0.00471022
Gm22098	predicted gene, 22098	0	0	0	0	1.10598	0.996028	0	0.70067	0.70067	0.642102	0.875654
Uck1	uridine-cytidine kinase 1	9.57201	9.46598	9.77098	9.67244	9.05292	9.22328	9.60299	9.31621	-0.286783	0.185506	0.443929
Mir1957a	microRNA 1957a	1.7711	0.99817	1.95377	0	0	0	1.57435	0	-1.57435	0.139985	0.363874
Gm12901	predicted gene 12901	0	0	0	2.0117	1.72461	0	0	1.24544	1.24544	0.285832	0.598797
---	---	1.7711	0	0	4.26269	4.2809	4.45184	0.590366	4.33181	3.74144	0.00010157	0.000952253
Ppp1r15b	protein phosphatase 1, regulatory (inhibitor) subunit 15b	11.3917	10.6284	11.1717	9.75323	9.61805	9.5543	11.0639	9.64186	-1.42206	1.18e-12	6.09e-11
Mir1981	microRNA 1981	1.1418	1.58252	0.969343	0.814054	1.10598	0.996028	1.23122	0.972021	-0.259202	0.765342	0.927867
Gm45767	predicted gene 45767	4.90485	4.75136	4.40033	4.31858	5.40899	5.38455	4.68551	5.03737	0.351861	0.393147	0.726053
9130213A22Rik	RIKEN cDNA 9130213A22 gene	1.7711	3.31863	2.75439	2.47219	0	0	2.61471	0.824064	-1.79064	0.221382	0.503724
Col20a1	collagen, type XX, alpha 1	7.10163	6.18621	6.85741	7.08693	6.57744	6.899	6.71508	6.85446	0.139375	0.7247	0.913375
Gm6419	predicted gene 6419	2.54257	2.58191	2.5335	3.33596	4.09882	4.24039	2.55266	3.89172	1.33906	0.0377186	0.134873
Rpl18-ps1	ribosomal protein L18, pseudogene 1	2.2078	2.9968	1.54394	2.26024	2.15619	3.16286	2.24951	2.52643	0.276917	0.787306	0.927867
Wisp3	WNT1 inducible signaling pathway protein 3	0	1.99725	0	3.5378	1.72461	2.31557	0.665751	2.52599	1.86024	0.112218	0.310432
Clasp1	CLIP associating protein 1	11.6507	12.2728	12.1963	12.984	13.2833	13.2324	12.0399	13.1666	1.12665	1.28e-08	3.22e-07
Lrrc51	leucine rich repeat containing 51	5.26317	6.08385	5.18761	6.73311	5.15273	5.82508	5.51155	5.90364	0.392094	0.319398	0.64426
2410137M14Rik	RIKEN cDNA 2410137M14 gene	2.54257	0	2.5335	2.65696	3.89039	0	1.69202	2.18245	0.490425	0.505549	0.82649
AK157302	cDNA sequence AK157302	8.00446	7.91522	8.19561	8.84923	8.95915	9.07687	8.03843	8.96175	0.92332	8.8e-08	1.81e-06
n-R5s157	nuclear encoded rRNA 5S 157	0	0	0	0	0	0.996028	0	0.332009	0.332009	0.839626	0.933154
Olfr91	olfactory receptor 91	0	0	0	0.814054	0	0	0	0.271351	0.271351	0.839626	0.933154
Gm12355	predicted gene 12355	6.39666	6.47211	6.14833	5.71572	5.92902	5.96945	6.33903	5.8714	-0.467635	0.11321	0.312348
Trav6n-7	T cell receptor alpha variable 6N-7	0	0	0	0.814054	0	0	0	0.271351	0.271351	0.839626	0.933154
Gm5844	predicted gene 5844	6.76002	6.6688	6.22423	6.16002	5.81552	6.25894	6.55102	6.07816	-0.472859	0.123401	0.332727
Rpsa-ps9	ribosomal protein SA, pseudogene 9	3.2397	3.4561	4.0292	3.33596	3.35327	3.31477	3.575	3.33467	-0.240336	0.639903	0.875654
Ralgps1	Ral GEF with PH domain and SH3 binding motif 1	8.09637	8.06244	9.34325	7.61913	7.99175	7.7865	8.50069	7.79912	-0.701565	0.0159217	0.0677875
Dnajc7	DnaJ heat shock protein family (Hsp40) member C7	11.6006	11.7063	11.5319	11.5779	11.4981	11.6332	11.6129	11.5697	-0.0431853	0.711507	0.909308
Gm5525	predicted gene 5525	5.39312	5.77776	4.89426	5.46644	4.71995	5.45166	5.35505	5.21268	-0.142366	0.74774	0.927603
Gm16014	predicted gene 16014	0	0	0	0	2.75751	0	0	0.919168	0.919168	0.362726	0.695059
Gm45290	predicted gene 45290	0	0	0	0	2.48795	2.31557	0	1.60117	1.60117	0.132545	0.350334
Zfp385c	zinc finger protein 385C	2.81411	3.31863	0	4.7832	4.19273	4.9465	2.04425	4.64081	2.59656	0.00549862	0.0280731
AC154231.1	---	0	0	1.95377	1.3313	1.10598	0.996028	0.651255	1.14444	0.49318	0.884276	0.959446
CT030170.2	---	0	0.99817	0	0	0	0	0.332723	0	-0.332723	0.787905	0.927867
Sgca	sarcoglycan, alpha (dystrophin-associated glycoprotein)	10.1019	10.3171	10.312	11.5117	11.3531	11.7519	10.2437	11.5389	1.2952	3.35e-17	3.25e-15
Irx2	Iroquois related homeobox 2 (Drosophila)	7.50768	7.02979	5.72053	7.3101	7.49811	7.34082	6.75267	7.38301	0.630347	0.246261	0.541379
Col1a1	collagen, type I, alpha 1	9.74832	13.5484	12.8946	11.9991	11.878	11.8046	12.0638	11.8939	-0.169875	0.361891	0.694796
Itga3	integrin alpha 3	10.4899	9.82923	10.1943	9.16149	8.95246	9.09272	10.1711	9.06889	-1.10224	8.59e-09	2.23e-07
AC154552.2	---	4.42705	3.90347	4.98433	4.01461	4.44255	3.4522	4.43828	3.96979	-0.468494	0.379101	0.713398
Map1s	microtubule-associated protein 1S	9.21585	9.03252	8.49661	9.09704	8.82993	9.01165	8.91499	8.97954	0.0645469	0.852053	0.939952
Bend4	BEN domain containing 4	6.17368	6.43932	5.63968	5.75676	6.00865	5.99217	6.08423	5.91919	-0.165033	0.559624	0.858678
Gm5796	predicted gene 5796	3.56793	1.99725	3.94197	3.22336	2.48795	3.57767	3.16905	3.09633	-0.072723	0.783082	0.927867
Amy2a4	amylase 2a4	1.1418	0	1.54394	0	0	0	0.895248	0	-0.895248	0.494927	0.815574
Gm29672	predicted gene 29672	0	0	0	0	0	0.996028	0	0.332009	0.332009	0.839626	0.933154
Agtrap	angiotensin II, type I receptor-associated protein	9.7402	10.1499	10.0216	10.2465	10.3581	10.412	9.97055	10.3389	0.368313	0.0197101	0.0799613
Rpf2	ribosome production factor 2 homolog	9.42022	8.80692	8.78365	8.05307	8.14057	8.2682	9.0036	8.15394	-0.849652	8.22e-05	0.000794569
AL591207.3	---	3.70771	0	2.5335	3.22336	4.09882	3.16286	2.0804	3.49501	1.41461	0.353971	0.685251
AL591582.1	---	3.70771	5.551	3.84913	6.61534	6.52425	6.51569	4.36928	6.55176	2.18248	0.000129306	0.00117309
CT025611.1	---	0	0	0	0	2.75751	0	0	0.919168	0.919168	0.362726	0.695059
Ppp2r2a	protein phosphatase 2, regulatory subunit B, alpha	11.9169	10.6519	10.5837	10.1439	10.4807	10.3263	11.0508	10.317	-0.733881	0.00615623	0.0308229
AC160931.4	---	0	0	0	0	0	1.57966	0	0.526555	0.526555	0.659841	0.87912
Nefl	neurofilament, light polypeptide	3.41313	2.80422	0	4.74292	3.64668	3.89947	2.07245	4.09636	2.02391	0.0607789	0.195609
Kif19a	kinesin family member 19A	5.39312	7.4393	3.84913	6.19029	4.19273	4.38474	5.56052	4.92259	-0.637928	0.196855	0.463727
Gm26852	predicted gene, 26852	5.16954	4.85445	4.94	5.53881	5.5576	5.07974	4.988	5.39205	0.404053	0.284012	0.596593
Aldh3a2	aldehyde dehydrogenase family 3, subfamily A2	9.89265	9.76783	9.74705	9.94741	10.0702	9.8808	9.80251	9.96615	0.163636	0.211967	0.48802
Adamdec1	ADAM-like, decysin 1	2.2078	5.48827	0	2.82072	0	0	2.56536	0.940241	-1.62512	0.358176	0.690004
Gm17552	predicted gene, 17552	6.72753	8.40998	7.45407	8.34645	8.2429	8.65028	7.53052	8.41321	0.882684	0.0479563	0.163189
Gm6684	predicted pseudogene 6684	0	1.58252	0	2.26024	0	0	0.527507	0.753414	0.225907	0.757625	0.927867
Pitx1	paired-like homeodomain transcription factor 1	0	1.99725	0	2.82072	0	0	0.665751	0.940241	0.274489	0.70019	0.905989
Gm8449	predicted gene 8449	0	0	1.54394	0	0	0	0.514647	0	-0.514647	0.642125	0.875654
AC153937.2	---	0	1.58252	2.27256	0	0	0	1.28503	0	-1.28503	0.231567	0.519217
Aqp8	aquaporin 8	0	2.58191	2.75439	4.65882	5.05609	4.79969	1.77877	4.8382	3.05943	0.000104362	0.0009755
Pou6f1	POU domain, class 6, transcription factor 1	9.42022	9.09174	9.35596	9.45123	9.48517	9.51366	9.28931	9.48335	0.194043	0.212202	0.488374
C330021F23Rik	RIKEN cDNA C330021F23 gene	0	2.319	4.11146	3.71483	3.50742	1.99404	2.14349	3.0721	0.928611	0.784284	0.927867
Tacc1	transforming, acidic coiled-coil containing protein 1	11.8698	11.1911	11.8831	10.9204	11.0773	10.9019	11.648	10.9665	-0.681468	0.000398166	0.003039
Gm44470	predicted gene, 44470	0	0	0	0	1.10598	0	0	0.36866	0.36866	0.839626	0.933154
Gm15528	predicted gene 15528	0	0	0	0	1.72461	0	0	0.574869	0.574869	0.625351	0.875654
Gm26520	predicted gene, 26520	0	1.58252	0	0	0	0	0.527507	0	-0.527507	0.632842	0.875654
Gm44033	predicted gene, 44033	0	0	3.4032	0	0	0	1.1344	0	-1.1344	0.168573	0.415313
1700030M09Rik	RIKEN cDNA 1700030M09 gene	0	0	1.54394	1.3313	0	0	0.514647	0.443766	-0.0708806	0.940658	0.980249
Vmn1r181	vomeronasal 1 receptor 181	1.7711	0	0	2.47219	1.72461	1.57966	0.590366	1.92549	1.33512	0.278155	0.587918
Gm8941	predicted gene 8941	0	0	0	1.3313	0	0	0	0.443766	0.443766	0.717611	0.909308
Acaa1b	acetyl-Coenzyme A acyltransferase 1B	5.85072	6.45581	5.43128	7.04613	5.52186	5.92291	5.9126	6.16363	0.25103	0.462301	0.792603
Lmntd1	lamin tail domain containing 1	7.85459	6.85435	6.98289	8.98278	8.91506	8.63592	7.23061	8.84459	1.61398	3.82e-08	8.56e-07
Zfp647	zinc finger protein 647	5.06942	4.52006	4.69525	5.89184	6.31046	6.07963	4.76158	6.09397	1.3324	0.000332399	0.00261339
Sntb2	syntrophin, basic 2	10.2321	9.7777	10.2679	9.34592	9.47586	9.44327	10.0926	9.42168	-0.670879	7.73e-05	0.000750521
Nkx6-2	NK6 homeobox 2	2.54257	3.69706	3.26627	2.0117	2.48795	3.4522	3.16863	2.65062	-0.518015	0.524411	0.841106
Gtf3c3	general transcription factor IIIC, polypeptide 3	8.50371	8.4882	8.26913	8.29514	8.58784	8.58826	8.42035	8.49041	0.0700648	0.693112	0.900463
Cftr	cystic fibrosis transmembrane conductance regulator	3.2397	4.08402	1.95377	2.96778	0	1.99404	3.09249	1.65394	-1.43856	0.216083	0.4952
Rnf17	ring finger protein 17	1.7711	3.69706	3.11496	3.62903	3.99836	3.99254	2.86104	3.87331	1.01227	0.238358	0.529198
Gm14308	predicted gene 14308	5.47367	5.69685	5.18761	5.51509	6.08411	5.63606	5.45271	5.74509	0.292375	0.424952	0.759987
Mir1954	microRNA 1954	1.1418	0	0.969343	2.0117	1.10598	1.57966	0.703716	1.56578	0.862067	0.401797	0.736353
Gm24325	predicted gene, 24325	1.1418	1.58252	1.54394	0.814054	1.10598	0.996028	1.42276	0.972021	-0.450735	0.620291	0.875654
Usp46os2	ubiquitin specific peptidase 46, opposite strand 2	0	0	2.27256	0	0	0	0.75752	0	-0.75752	0.470221	0.797323
---	---	3.41313	1.58252	5.1097	3.10122	3.77368	0.996028	3.36845	2.62364	-0.744809	0.305982	0.625789
---	---	3.70771	1.58252	2.5335	0	2.75751	0	2.60791	0.919168	-1.68874	0.250562	0.547946
---	---	2.54257	0	0	1.71125	2.15619	0	0.847525	1.28914	0.44162	0.896907	0.966369
---	---	4.65142	5.24436	4.26311	5.39025	5.19873	5.89907	4.71963	5.49602	0.776386	0.0938499	0.271791
Tnfsf11	tumor necrosis factor (ligand) superfamily, member 11	4.25539	4.16647	2.94591	1.71125	0	0	3.78926	0.570415	-3.21884	0.0013056	0.00833888
Epsti1	epithelial stromal interaction 1 (breast)	5.85072	8.00198	6.8212	6.83243	5.98259	6.34969	6.8913	6.38824	-0.50306	0.142104	0.36793
Akap11	A kinase (PRKA) anchor protein 11	10.0796	9.5681	9.76464	9.58542	9.78189	9.59383	9.80411	9.65371	-0.150401	0.35304	0.684682
Tsc22d1	TSC22 domain family, member 1	13.0471	12.1641	12.0728	12.5856	12.4615	12.4404	12.428	12.4958	0.0678291	0.996395	0.998173
Dnajc15	DnaJ heat shock protein family (Hsp40) member C15	10.0155	9.97791	9.977	10.6554	10.6691	10.7106	9.99012	10.6784	0.688234	6.62e-10	2.2e-08
Enox1	ecto-NOX disulfide-thiol exchanger 1	4.34377	4.08402	4.52562	4.61486	4.7817	3.89947	4.3178	4.43201	0.114204	0.766623	0.927867
Tdrd3	tudor domain containing 3	8.75404	8.81971	8.59281	9.25754	9.49902	9.36927	8.72219	9.37528	0.65309	2.8e-05	0.000311818
Rgcc	regulator of cell cycle	10.6663	8.42261	10.2978	9.14998	8.97906	8.70631	9.79556	8.94512	-0.850448	0.0735299	0.226472
Cdca7	cell division cycle associated 7	6.62545	7.48821	5.8698	6.46249	5.15273	5.89907	6.66115	5.8381	-0.823054	0.0688837	0.215558
Prpsap2	phosphoribosyl pyrophosphate synthetase-associated protein 2	7.67033	7.91522	7.50821	8.04895	7.8762	7.84383	7.69792	7.92299	0.225073	0.284552	0.597462
Myo19	myosin XIX	8.72553	8.59626	8.28251	8.41855	8.86601	8.09536	8.53477	8.45997	-0.0747934	0.828179	0.933154
Znhit3	zinc finger, HIT type 3	7.0631	7.51206	7.13812	7.55077	7.50728	7.30498	7.23776	7.45434	0.216584	0.377247	0.711368
Ppm1d	protein phosphatase 1D magnesium-dependent, delta isoform	8.98113	7.99635	8.86296	8.02815	8.19831	8.29585	8.61348	8.1741	-0.439377	0.064304	0.20435
Gria1	glutamate receptor, ionotropic, AMPA1 (alpha 1)	2.81411	0	3.74989	4.37238	3.50742	4.16241	2.188	4.01407	1.82607	0.155359	0.392653
Fam114a2	family with sequence similarity 114, member A2	9.77041	10.0851	9.80537	10.1612	10.1323	10.3038	9.88697	10.1991	0.31212	0.0381533	0.136138
Mfap3	microfibrillar-associated protein 3	9.19224	9.21551	9.16454	8.8913	9.16722	8.89293	9.19076	8.98382	-0.206948	0.185269	0.44357
Rnft1	ring finger protein, transmembrane 1	9.79021	9.65812	9.56928	9.20662	9.4404	9.21123	9.67254	9.28608	-0.386454	0.00968839	0.0448606
Galnt10	UDP-N-acetyl-alpha-D-galactosamine:polypeptide N-acetylgalactosaminyltransferase 10	7.89171	9.00757	8.20969	9.24498	9.07158	8.81224	8.36966	9.04293	0.673276	0.0347385	0.126016
Gm17102	predicted gene 17102	1.7711	0	0	0	2.15619	0	0.590366	0.718729	0.128363	0.866059	0.948374
Gm20777	predicted gene, 20777	0	0.99817	0	0	1.10598	0	0.332723	0.36866	0.035937	0.973412	0.988172
Gm44651	predicted gene 44651	0	0	0	0.814054	0	0	0	0.271351	0.271351	0.839626	0.933154
Gm45188	predicted gene 45188	0	0	0	2.26024	2.15619	0	0	1.47214	1.47214	0.17499	0.42586
B230311B06Rik	RIKEN cDNA B230311B06 gene	0	1.99725	0	1.3313	0	0	0.665751	0.443766	-0.221986	0.787415	0.927867
Usp47	ubiquitin specific peptidase 47	12.0661	11.7179	11.897	11.4209	11.584	11.6942	11.8936	11.5664	-0.327267	0.0271019	0.10361
Hp1bp3	heterochromatin protein 1, binding protein 3	11.6442	11.5007	11.7949	11.7453	11.8859	11.7631	11.6466	11.7981	0.151526	0.267307	0.572334
Pard3b	par-3 family cell polarity regulator beta	7.97709	7.84184	8.63514	8.00704	8.18695	7.73355	8.15136	7.97585	-0.175511	0.428121	0.762656
Lypd8	LY6/PLAUR domain containing 8	3.04254	2.58191	3.64332	0	0	1.57966	3.08926	0.526555	-2.5627	0.013381	0.0588388
Sh3bp5l	SH3 binding domain protein 5 like	9.47995	9.65812	9.70296	9.62336	9.45942	9.49985	9.61368	9.52754	-0.0861341	0.535176	0.843174
---	---	3.56793	2.9968	4.18928	2.0117	2.98454	3.16286	3.58467	2.7197	-0.864967	0.210322	0.485411
---	---	2.81411	3.4561	2.27256	0.814054	2.48795	1.99404	2.84759	1.76535	-1.08224	0.226822	0.512281
Pink1	PTEN induced putative kinase 1	13.5458	12.697	13.1809	13.6457	13.5218	13.9594	13.1412	13.709	0.567724	0.0189886	0.077669
Ldoc1	leucine zipper, down-regulated in cancer 1	1.7711	0	1.54394	2.96778	3.50742	2.31557	1.10501	2.93026	1.82524	0.0608576	0.195794
Gnai1	guanine nucleotide binding protein (G protein), alpha inhibiting 1	7.69574	7.71745	7.64568	7.63572	6.86103	7.06892	7.68629	7.18856	-0.497735	0.0824882	0.247057
Stil	Scl/Tal1 interrupting locus	0	5.64027	3.84913	4.08075	4.09882	2.57834	3.16313	3.58597	0.422835	0.4866	0.81057
Cmpk1	cytidine monophosphate (UMP-CMP) kinase 1	10.9405	10.57	10.7243	9.80306	9.89622	9.6449	10.7449	9.78139	-0.963555	3.18e-10	1.14e-08
Gm20219	predicted gene, 20219	6.17368	4.85445	7.67978	5.67349	5.69231	4.51595	6.23597	5.29392	-0.942051	0.0401854	0.141885
Atpaf1	ATP synthase mitochondrial F1 complex assembly factor 1	9.75034	9.47612	9.61229	10.3448	10.5947	10.7149	9.61292	10.5515	0.938546	2.25e-09	6.59e-08
---	---	0	0	0	0	2.15619	0	0	0.718729	0.718729	0.520697	0.838189
Cyp4b1	cytochrome P450, family 4, subfamily b, polypeptide 1	9.98486	9.32052	9.17892	10.4619	9.95435	10.1469	9.49477	10.1877	0.692934	0.00541282	0.027705
Cyp4a14	cytochrome P450, family 4, subfamily a, polypeptide 14	0	0	2.27256	0	0	0	0.75752	0	-0.75752	0.470221	0.797323
Pdzk1ip1	PDZK1 interacting protein 1	2.54257	3.99657	4.46433	5.25358	0	3.99254	3.66782	3.08204	-0.585784	0.737754	0.921919
Rptor	regulatory associated protein of MTOR, complex 1	10.0683	9.80209	10.2396	9.91492	9.86268	10.0715	10.0366	9.94971	-0.0869347	0.556558	0.855627
Gm9113	predicted pseudogene 9113	0	1.58252	0	0	0	0	0.527507	0	-0.527507	0.632842	0.875654
Gm36944	predicted gene, 36944	0	0	0	1.3313	0	0	0	0.443766	0.443766	0.717611	0.909308
Gm2367	predicted gene 2367	0	0	0	0	0	1.57966	0	0.526555	0.526555	0.659841	0.87912
Polg	polymerase (DNA directed), gamma	10.8225	10.4629	10.4026	10.7875	10.6444	10.8609	10.5627	10.7642	0.201586	0.227139	0.512619
Mogat2	monoacylglycerol O-acyltransferase 2	0	3.4561	2.27256	4.42424	4.65544	3.89947	1.90955	4.32638	2.41683	0.0183478	0.0754983
Mir1982	microRNA 1982	1.1418	0.99817	0.969343	0.814054	1.10598	0.996028	1.03644	0.972021	-0.0644183	0.94473	0.980249
Acot4	acyl-CoA thioesterase 4	7.72071	6.55097	6.41446	4.7832	5.00523	5.63606	6.89538	5.1415	-1.75388	3.58e-05	0.000386191
---	---	0	0.99817	0	0	0	0	0.332723	0	-0.332723	0.787905	0.927867
Gm7039	predicted gene 7039	0	0	1.54394	1.3313	2.15619	0	0.514647	1.1625	0.647849	0.591068	0.875654
Tbc1d19	TBC1 domain family, member 19	7.59129	8.29097	7.44616	8.70205	8.71594	8.69942	7.77614	8.7058	0.929659	0.000390298	0.00298722
Tekt5	tektin 5	0	2.80422	2.75439	0	0	0	1.85287	0	-1.85287	0.0511992	0.171494
Gm22121	predicted gene, 22121	0	1.58252	1.54394	0.814054	1.10598	0	1.04215	0.640012	-0.402142	0.640776	0.875654
---	---	2.2078	0	0	0	0	0	0.735934	0	-0.735934	0.48784	0.81057
Gm22123	predicted gene, 22123	1.1418	0.99817	0.969343	0.814054	1.10598	0.996028	1.03644	0.972021	-0.0644183	0.94473	0.980249
Snord53	small nucleolar RNA, C/D box 53	3.04254	2.9968	1.54394	0.814054	2.15619	1.99404	2.52776	1.65476	-0.872999	0.30534	0.624974
---	---	2.2078	2.80422	2.27256	0	1.72461	1.99404	2.42819	1.23955	-1.18864	0.290419	0.604935
Slc18a2	solute carrier family 18 (vesicular monoamine), member 2	4.71907	5.92714	5.82174	6.45003	6.84665	6.29593	5.48931	6.53087	1.04156	0.0142204	0.0618032
Hspa12a	heat shock protein 12A	7.60029	8.65456	8.33909	10.1057	10.5522	10.2635	8.19798	10.3071	2.10915	1.3e-15	1.03e-13
---	---	1.7711	1.58252	1.95377	1.71125	0	1.57966	1.76913	1.09697	-0.672159	0.638051	0.875654
AC160966.2	---	0	0	0	0	0	1.99404	0	0.664679	0.664679	0.554011	0.853566
AC112680.1	---	2.54257	3.4561	0.969343	4.86053	4.44255	5.03668	2.32267	4.77992	2.45725	0.00146161	0.00918322
AC150314.3	---	3.95222	3.31863	4.52562	3.33596	0	0	3.93216	1.11199	-2.82017	0.0610022	0.196141
Ccdc96	coiled-coil domain containing 96	4.25539	5.38874	3.84913	5.10259	4.51706	3.99254	4.49775	4.5374	0.0396449	0.948895	0.982419
Gm17836	predicted gene, 17836	0	0.99817	0	0	0	0	0.332723	0	-0.332723	0.787905	0.927867
Psmd6	proteasome (prosome, macropain) 26S subunit, non-ATPase, 6	11.1784	10.9145	11.0738	10.6183	10.614	10.7003	11.0555	10.6442	-0.411379	0.00115322	0.00751966
Mrps30	mitochondrial ribosomal protein S30	9.75236	9.62205	9.93949	9.76585	9.91356	9.95206	9.7713	9.87716	0.105855	0.494787	0.815574
Hcn1	hyperpolarization-activated, cyclic nucleotide-gated K+ 1	6.60771	5.77776	5.1097	6.17524	6.20172	6.62148	5.83173	6.33281	0.501089	0.348617	0.679671
Slc4a7	solute carrier family 4, sodium bicarbonate cotransporter, member 7	6.72753	8.25374	8.96881	7.9813	8.22634	7.73355	7.98336	7.9804	-0.00296127	0.553002	0.853566
Fgf10	fibroblast growth factor 10	4.84554	6.04079	5.06911	6.03215	4.36399	4.63622	5.31848	5.01079	-0.307694	0.728284	0.915939
Atxn7	ataxin 7	10.4481	9.21793	10.3633	9.22318	9.29447	8.9139	10.0098	9.14385	-0.865926	0.00106346	0.00702049
Pawr	PRKC, apoptosis, WT1, regulator	7.67885	6.79079	6.84544	6.55845	6.17895	6.18198	7.10502	6.30646	-0.798564	0.011554	0.0520206
4930580E04Rik	RIKEN cDNA 4930580E04 gene	0	1.58252	0	0	0	0	0.527507	0	-0.527507	0.632842	0.875654
Zhx3	zinc fingers and homeoboxes 3	9.72177	9.11788	9.90675	9.53175	9.68624	9.57702	9.58213	9.59834	0.0162049	0.925451	0.980249
A630095E13Rik	RIKEN cDNA A630095E13 gene	0	0	1.54394	0	0	0	0.514647	0	-0.514647	0.642125	0.875654
AI182371	expressed sequence AI182371	4.25539	2.80422	4.79818	4.14398	2.98454	4.07998	3.9526	3.73616	-0.216432	0.623491	0.875654
Gm43375	predicted gene 43375	3.83514	4.85445	5.06911	3.79581	2.98454	2.99304	4.58623	3.2578	-1.32843	0.0230675	0.0908679
Gm34086	predicted gene, 34086	0	0.99817	0	0	0	0	0.332723	0	-0.332723	0.787905	0.927867
Hykk	hydroxylysine kinase 1	4.71907	5.51998	4.58441	6.61534	6.33126	6.33199	4.94115	6.4262	1.48504	0.000156771	0.0013797
Mir7646	microRNA 7646	1.1418	0.99817	0.969343	0.814054	1.10598	0.996028	1.03644	0.972021	-0.0644183	0.94473	0.980249
AC154552.1	---	1.7711	0	0	0.814054	0	0	0.590366	0.271351	-0.319015	0.752947	0.927867
AL513022.1	---	6.24426	6.01876	8.37283	0	0	0	6.87862	0	-6.87862	6.18e-09	1.65e-07
Gm16556	predicted gene 16556	3.04254	2.80422	2.27256	0.814054	0	0	2.70644	0.271351	-2.43509	0.0143959	0.0623958
CT009718.1	---	6.76002	7.04076	7.0153	6.72279	7.11001	7.2305	6.93869	7.0211	0.0824071	0.737797	0.921934
Fgfrl1	fibroblast growth factor receptor-like 1	8.91054	8.31828	8.37699	8.71512	8.32296	8.7767	8.53527	8.60493	0.0696564	0.789443	0.929004
AC156560.1	---	2.54257	0.99817	0.969343	0.814054	2.15619	0.996028	1.50336	1.32209	-0.181272	0.799782	0.933154
Ly6i	lymphocyte antigen 6 complex, locus I	0	4.99645	2.75439	1.3313	3.50742	2.99304	2.58362	2.61059	0.026972	0.427715	0.762656
Gm16193	predicted gene 16193	1.7711	1.58252	0	0	1.72461	0	1.11787	0.574869	-0.543004	0.68949	0.898033
A630052C17Rik	RIKEN cDNA A630052C17 gene	6.82287	5.95059	6.44651	6.45003	5.40899	6.34969	6.40666	6.06957	-0.337085	0.439535	0.774233
Gm12833	predicted gene 12833	1.1418	0	0	1.3313	0	0	0.380602	0.443766	0.0631643	0.900302	0.967335
4931428L18Rik	RIKEN cDNA 4931428L18 gene	3.41313	0	1.54394	1.71125	0	1.57966	1.65236	1.09697	-0.555386	0.424432	0.759685
Gm13750	predicted gene 13750	0	0.99817	0	0	0	0.996028	0.332723	0.332009	-0.000714	0.973412	0.988172
Fbxo31	F-box protein 31	11.7491	10.5851	11.3405	11.1572	10.9231	11.3908	11.2249	11.157	-0.0678477	0.622149	0.875654
Gm15499	predicted gene 15499	0	0	0.969343	0.814054	0	0	0.323114	0.271351	-0.051763	0.973412	0.988172
Gm15589	predicted gene 15589	0	0	2.27256	0	0	0	0.75752	0	-0.75752	0.470221	0.797323
Man2c1os	mannosidase, alpha, class 2C, member 1, opposite strand	3.95222	3.58161	3.26627	3.33596	4.65544	4.24039	3.60003	4.07726	0.477231	0.372431	0.706241
---	---	1.7711	0	0	0	0	0	0.590366	0	-0.590366	0.589356	0.875654
---	---	4.06051	4.08402	0	2.0117	4.09882	0.996028	2.71484	2.36885	-0.345994	0.607156	0.875654
---	---	0	0.99817	0.969343	0.814054	1.10598	0	0.655838	0.640012	-0.0158261	0.977692	0.99034
---	---	0	0	1.54394	0.814054	0	0	0.514647	0.271351	-0.243295	0.820288	0.933154
Gm45293	predicted gene 45293	0	0	1.54394	4.20456	4.7817	4.45184	0.514647	4.47936	3.96472	4.7e-05	0.000487545
Iqcb1	IQ calmodulin-binding motif containing 1	8.22411	7.33621	8.40172	8.0365	8.08041	8.13673	7.98735	8.08455	0.0972004	0.918704	0.97777
Mylk	myosin, light polypeptide kinase	10.191	10.2119	10.4067	10.9176	10.5321	10.4607	10.2699	10.6368	0.366929	0.0243506	0.0949487
Trgv2	T cell receptor gamma variable 2	0	2.58191	0	2.26024	0	0	0.860637	0.753414	-0.107223	0.893623	0.964786
Ccdc14	coiled-coil domain containing 14	6.82287	6.98505	6.66654	6.57001	6.5422	6.98079	6.82482	6.69767	-0.127154	0.656689	0.87912
Hcls1	hematopoietic cell specific Lyn substrate 1	10.5019	10.6581	9.93385	9.14226	8.55727	8.68555	10.3646	8.79503	-1.5696	1.89e-11	8.07e-10
Eaf2	ELL associated factor 2	4.84554	4.08402	4.94	5.39025	4.71995	5.38455	4.62319	5.16492	0.54173	0.244465	0.538455
Myl6b	myosin, light polypeptide 6B	5.69142	5.16636	4.74763	6.03215	6.03424	5.74708	5.20181	5.93783	0.736019	0.0674417	0.212053
Trub2	TruB pseudouridine (psi) synthase family member 2	9.14075	9.11788	9.29347	8.8913	8.96582	9.07952	9.18403	8.97888	-0.205151	0.163704	0.407359
Gm14291	predicted gene 14291	0	2.9968	2.75439	1.3313	2.15619	0	1.91706	1.1625	-0.754568	0.383624	0.717962
Gm12688	predicted gene 12688	3.56793	2.58191	4.0292	2.82072	3.35327	2.99304	3.39301	3.05568	-0.337336	0.515019	0.837224
Gm15328	predicted gene 15328	3.83514	4.38883	4.40033	5.73639	6.05939	5.72012	4.2081	5.83863	1.63053	8.28e-05	0.000799084
Wdr70	WD repeat domain 70	9.25342	8.95635	9.1427	8.77627	8.63042	8.88385	9.11749	8.76351	-0.353977	0.0311793	0.115893
Coa6	cytochrome c oxidase assembly factor 6	6.55314	7.13592	6.90431	7.91487	7.67123	7.53125	6.86446	7.70578	0.841329	0.000918319	0.00619594
Ccnd1	cyclin D1	11.0406	11.2472	11.4384	11.4641	11.2967	11.1412	11.2421	11.3007	0.0585781	0.728015	0.915791
Hnrnph3	heterogeneous nuclear ribonucleoprotein H3	9.47261	9.84496	9.69798	10.5114	10.3441	10.6323	9.67185	10.4959	0.824083	1.96e-07	3.79e-06
Gm10287	predicted gene 10287	0	0	0	0	2.48795	0	0	0.829317	0.829317	0.449786	0.783455
Sirt1	sirtuin 1	9.95886	8.51598	9.21657	8.31931	8.67177	8.43501	9.23047	8.47537	-0.755106	0.0064341	0.0319586
Mybpc1	myosin binding protein C, slow-type	0	0	3.11496	2.82072	3.77368	3.4522	1.03832	3.34887	2.31055	0.148456	0.379801
Sox11	SRY (sex determining region Y)-box 11	1.7711	1.58252	0	2.47219	2.75751	2.31557	1.11787	2.51509	1.39722	0.189513	0.450953
Mypn	myopalladin	12.2994	11.4917	11.5747	11.8131	12.1424	12.1002	11.7886	12.0186	0.229992	0.407722	0.741872
Herc4	hect domain and RLD 4	10.5387	10.097	10.2566	9.3857	9.51047	9.51169	10.2974	9.46929	-0.828141	1.86e-07	3.62e-06
Hsf5	heat shock transcription factor family member 5	0	0	2.27256	0	0	0	0.75752	0	-0.75752	0.470221	0.797323
Cabp7	calcium binding protein 7	0	1.99725	0	3.79581	3.77368	2.99304	0.665751	3.52084	2.85509	0.00706679	0.0346714
Glis3	GLIS family zinc finger 3	7.81648	7.10489	8.03628	5.6519	5.48521	4.8992	7.65255	5.34543	-2.30712	1.95e-11	8.3e-10
Pdilt	protein disulfide isomerase-like, testis expressed	0	1.99725	1.54394	0	0	0	1.1804	0	-1.1804	0.297008	0.613159
Eef1akmt2	EEF1A lysine methyltransferase 2	6.66028	7.70371	7.33071	7.384	6.9974	7.4597	7.23157	7.28036	0.0487933	0.998504	0.99923
Trim21	tripartite motif-containing 21	7.41892	8.14101	7.90982	8.42174	8.34358	8.33637	7.82325	8.36723	0.543982	0.0229801	0.0906184
Zranb1	zinc finger, RAN-binding domain containing 1	11.0488	10.1062	10.8643	10.2882	10.5411	10.5215	10.6731	10.4502	-0.222874	0.243756	0.537323
Abraxas2	BRISC complex subunit	9.5326	9.44136	9.65748	9.21768	9.36424	9.05546	9.54381	9.21246	-0.331355	0.032624	0.119925
Gm4596	predicted gene 4596	3.41313	2.319	3.26627	2.96778	3.18065	3.79997	2.99946	3.31613	0.316668	0.677275	0.890488
Sars2	seryl-aminoacyl-tRNA synthetase 2	7.13916	8.02426	7.3221	8.59297	8.38893	8.49986	7.49517	8.49392	0.998745	0.000272381	0.00221034
Gm44412	predicted gene, 44412	0	0	0	1.3313	0	0	0	0.443766	0.443766	0.717611	0.909308
Slitrk3	SLIT and NTRK-like family, member 3	0	1.58252	0	1.3313	2.75751	0	0.527507	1.36293	0.835427	0.42475	0.759942
Ankrd46	ankyrin repeat domain 46	9.45536	9.61105	9.83442	10.0746	9.86268	10.0351	9.63361	9.99078	0.357168	0.0251067	0.0974076
Utp3	UTP3 small subunit processome component	10.3502	10.165	10.156	9.63853	9.64114	9.7978	10.2237	9.69249	-0.531247	8.29e-05	0.000800634
Runx3	runt related transcription factor 3	6.41717	7.75791	7.06776	5.69476	4.19273	4.63622	7.08095	4.84124	-2.23971	4.64e-06	6.4e-05
Rps12-ps10	ribosomal protein S12, pseudogene 10	2.2078	1.58252	1.54394	0	0	0	1.77809	0	-1.77809	0.0875823	0.258482
Ppan	peter pan homolog (Drosophila)	10.5756	9.70197	9.49461	8.69942	8.4895	8.5117	9.92407	8.56687	-1.3572	1.52e-07	3e-06
Rps12-ps16	ribosomal protein S12, pseudogene 16	0	0	0	0.814054	0	0	0	0.271351	0.271351	0.839626	0.933154
Zfp994	zinc finger protein 994	6.45735	6.85435	6.27865	6.92535	7.48888	6.65034	6.53012	7.02152	0.491406	0.111146	0.308438
Fuk	fucokinase	7.01007	7.70371	7.19582	7.74173	7.4796	7.67858	7.3032	7.6333	0.330103	0.23195	0.519594
Acbd6	acyl-Coenzyme A binding domain containing 6	9.03853	8.81971	9.14514	9.34086	8.86957	9.34741	9.00113	9.18595	0.184821	0.307772	0.628211
Lrrc24	leucine rich repeat containing 24	2.81411	2.319	2.75439	4.5227	3.64668	3.57767	2.62917	3.91568	1.28652	0.0426164	0.148581
Smyd5	SET and MYND domain containing 5	9.62368	9.37138	9.12548	8.68354	8.71198	8.81861	9.37351	8.73804	-0.635471	0.000293704	0.00235937
Stard9	START domain containing 9	7.9279	9.00477	8.78051	8.93888	9.35666	8.98075	8.57106	9.09209	0.521033	0.0931991	0.270449
Acp7	acid phosphatase 7, tartrate resistant	0	1.99725	0	2.65696	0	0	0.665751	0.885652	0.219901	0.758469	0.927867
4930427A07Rik	RIKEN cDNA 4930427A07 gene	4.58044	6.59629	5.58314	4.01461	3.35327	3.31477	5.58662	3.56088	-2.02574	0.000198683	0.00169487
Klf10	Kruppel-like factor 10	10.4481	9.92115	9.93102	9.10699	8.96249	9.01165	10.1001	9.02704	-1.07305	5.59e-09	1.5e-07
Fbxo27	F-box protein 27	3.95222	3.4561	2.27256	2.96778	2.48795	3.4522	3.22696	2.96931	-0.257652	0.640703	0.875654
Ints7	integrator complex subunit 7	8.71314	9.23475	8.17663	9.3906	9.36928	9.55621	8.70818	9.43869	0.730519	0.00875656	0.041342
Gm36955	predicted gene, 36955	0	0	0	0	1.72461	0	0	0.574869	0.574869	0.625351	0.875654
Tbc1d9	TBC1 domain family, member 9	7.83947	8.55477	8.46175	7.70551	7.48888	7.51565	8.28533	7.57001	-0.715316	0.00201615	0.0120591
Tecr	trans-2,3-enoyl-CoA reductase	12.85	11.9356	12.4039	13.3484	13.4176	13.4647	12.3965	13.4102	1.01379	1.36e-05	0.000165421
Rfx1	regulatory factor X, 1 (influences HLA class II expression)	8.09	9.10225	9.39959	9.27706	8.82261	9.09009	8.86395	9.06325	0.199308	0.713087	0.909308
Dnaja2	DnaJ heat shock protein family (Hsp40) member A2	12.6281	11.9293	12.3812	12.1291	12.2971	12.4248	12.3129	12.2837	-0.0292165	0.791232	0.930443
Gpt2	glutamic pyruvate transaminase (alanine aminotransferase) 2	8.44498	8.58506	7.91555	9.65355	9.5398	9.58825	8.3152	9.59386	1.27867	4.73e-10	1.63e-08
Itfg1	integrin alpha FG-GAP repeat containing 1	10.0634	10.18	10.2453	10.4114	10.7222	10.5476	10.1629	10.5604	0.397516	0.0046076	0.0241256
Ncstn	nicastrin	10.9721	11.0428	11.2645	10.7943	10.7914	10.8777	11.0931	10.8211	-0.271963	0.0365794	0.131466
Fmnl3	formin-like 3	10.698	10.4609	10.7381	10.5159	10.6076	10.4277	10.6324	10.5171	-0.115287	0.388084	0.723161
Tuba1b	tubulin, alpha 1B	13.3724	13.9194	13.81	12.6844	12.6023	12.5445	13.7006	12.6104	-1.09018	1.68e-10	6.28e-09
Prpf40b	pre-mRNA processing factor 40B	9.10642	9.87286	9.25327	10.2411	10.2489	10.2352	9.41085	10.2417	0.830892	0.000183231	0.00157909
BC100530	cDNA sequence BC100530	4.16124	4.90335	4.40033	0	0	0	4.48831	0	-4.48831	3.19e-07	5.88e-06
Dhh	desert hedgehog	5.54997	6.26317	5.79709	5.92821	5.5576	5.79954	5.87008	5.76178	-0.108292	0.711416	0.909308
Bicd1	bicaudal D homolog 1 (Drosophila)	7.83185	7.81653	8.16705	6.89809	7.18047	6.82501	7.93848	6.96786	-0.970619	1.7e-05	0.000200726
Stfa1	stefin A1	3.04254	5.12573	4.26311	0	0	0	4.14379	0	-4.14379	2.95e-06	4.28e-05
Ndufb3	NADH dehydrogenase (ubiquinone) 1 beta subcomplex 3	11.5814	11.5282	11.5532	12.2739	12.1298	12.6001	11.5543	12.3346	0.780331	4.12e-07	7.42e-06
Cflar	CASP8 and FADD-like apoptosis regulator	11.1986	10.468	10.6946	10.2759	10.3492	10.0241	10.7871	10.2164	-0.570665	0.00413848	0.0220464
Orc2	origin recognition complex, subunit 2	9.17428	8.96213	9.0388	8.19419	8.43289	8.35401	9.0584	8.32703	-0.731369	6.3e-06	8.38e-05
Nif3l1	Ngg1 interacting factor 3-like 1 (S. pombe)	8.22992	8.90624	8.76153	8.90277	8.80413	8.7767	8.63256	8.82787	0.195304	0.425456	0.760485
Ppil3	peptidylprolyl isomerase (cyclophilin)-like 3	7.59129	8.17626	7.06776	7.82126	7.96538	7.9977	7.61177	7.92811	0.316342	0.395632	0.729334
Clk1	CDC-like kinase 1	12.0882	11.5165	11.7614	11.5679	11.6553	11.5952	11.7887	11.6061	-0.182555	0.237224	0.527801
Sgo2a	shugoshin 2A	5.39312	7.02979	5.98337	7.10293	7.80364	7.79298	6.13543	7.56652	1.43109	0.00166846	0.0102813
Gm13577	predicted gene 13577	5.16954	4.80382	5.39889	4.14398	4.51706	3.99254	5.12409	4.21786	-0.906225	0.0429287	0.149447
Nipsnap1	nipsnap homolog 1	5.78909	6.33623	4.79818	6.3054	5.28655	5.72012	5.64117	5.77069	0.129519	0.88658	0.961041
Agrp	agouti related neuropeptide	2.2078	2.9968	1.54394	3.33596	3.99836	2.99304	2.24951	3.44246	1.19294	0.139763	0.363611
Gm13652	predicted gene 13652	0	1.58252	0	1.71125	1.72461	2.57834	0.527507	2.00473	1.47722	0.219377	0.500705
Fbxo36	F-box protein 36	4.65142	5.90329	5.1097	5.53881	4.65544	5.24018	5.22147	5.14481	-0.0766611	0.797508	0.933154
Gm10553	predicted gene 10553	2.2078	0	0.969343	2.26024	2.15619	1.57966	1.05905	1.9987	0.939651	0.479015	0.804803
Rab18	RAB18, member RAS oncogene family	11.5487	11.1127	11.4264	11.018	11.0524	11.1045	11.3626	11.0583	-0.304259	0.0366369	0.131642
Polr1a	polymerase (RNA) I polypeptide A	11.0521	10.4629	10.4077	10.1905	10.5038	10.4025	10.6409	10.3656	-0.275334	0.139567	0.36329
Fzd9	frizzled class receptor 9	4.78369	3.69706	3.26627	4.26269	3.99836	4.99229	3.91567	4.41778	0.502111	0.470722	0.797771
Clip1	CAP-GLY domain containing linker protein 1	12.0886	11.9245	12.6763	12.4053	12.67	12.5394	12.2298	12.5383	0.308436	0.192764	0.45668
Lingo1	leucine rich repeat and Ig domain containing 1	4.78369	4.08402	4.98433	6.3328	6.05939	6.33199	4.61735	6.2414	1.62405	3.58e-05	0.000386191
Tmie	transmembrane inner ear	5.3078	5.66884	4.74763	6.17524	5.87338	6.31407	5.24142	6.1209	0.879475	0.0246294	0.0959124
Pcgf1	polycomb group ring finger 1	7.15146	7.46396	7.02595	7.35756	7.28011	7.53125	7.21379	7.38964	0.175848	0.470409	0.797419
Nkain2	Na+/K+ transporting ATPase interacting 2	3.56793	2.80422	3.52825	3.5378	4.09882	2.99304	3.30013	3.54322	0.243088	0.67964	0.892096
Gm11733	predicted gene 11733	0	0	0	1.71125	0	1.99404	0	1.23509	1.23509	0.288155	0.601666
Usp27x	ubiquitin specific peptidase 27, X chromosome	5.90982	5.80376	4.89426	5.46644	5.05609	5.07974	5.53594	5.20076	-0.335187	0.370464	0.704185
Rnf40	ring finger protein 40	11.066	10.762	11.2217	10.7027	10.6402	10.7994	11.0166	10.7141	-0.30246	0.0458821	0.157627
Mtss1	metastasis suppressor 1	8.77007	10.1638	9.74866	10.5513	10.7124	10.7411	9.56083	10.6683	1.10743	0.000529922	0.00388512
Washc5	WASH complex subunit 5	9.58113	9.86516	9.71617	9.52435	9.73388	9.69249	9.72082	9.65024	-0.0705826	0.61532	0.875654
Sqle	squalene epoxidase	7.55473	7.8481	7.88664	7.46671	6.72619	7.30498	7.76316	7.16596	-0.5972	0.0291447	0.109785
Kcnd3os	potassium voltage-gated channel, Shal-related family, member 3, opposite strand	3.2397	3.31863	3.26627	4.47431	3.99836	4.79969	3.27487	4.42412	1.14925	0.0333949	0.122019
Klhl38	kelch-like 38	6.41717	7.83556	6.02641	8.45017	8.54397	8.96648	6.75972	8.65354	1.89382	3.73e-05	0.00039893
Ndufb9	NADH dehydrogenase (ubiquinone) 1 beta subcomplex, 9	13.0871	12.7722	13.0026	13.5375	13.4653	13.6949	12.9539	13.5659	0.611951	2.75e-05	0.000306818
Gm22136	predicted gene, 22136	0	0	0	0	1.72461	0	0	0.574869	0.574869	0.625351	0.875654
Gm22774	predicted gene, 22774	1.1418	0.99817	0.969343	0.814054	1.10598	0.996028	1.03644	0.972021	-0.0644183	0.94473	0.980249
Wdyhv1	WDYHV motif containing 1	7.43912	7.4393	6.49328	8.06945	8.29147	8.21607	7.1239	8.19233	1.06843	0.000322029	0.00254708
Mir1938	microRNA 1938	1.1418	0.99817	0.969343	0.814054	1.10598	0	1.03644	0.640012	-0.396428	0.73943	0.922012
Gm43006	predicted gene 43006	1.7711	2.319	2.27256	2.82072	3.77368	3.16286	2.12089	3.25242	1.13153	0.132308	0.350035
Gm10290	predicted pseudogene 10290	0	1.99725	1.95377	0	1.72461	1.57966	1.31701	1.10142	-0.215583	0.781257	0.927867
Gm43292	predicted gene 43292	0	1.58252	1.95377	1.71125	1.72461	1.99404	1.17876	1.80996	0.631201	0.689344	0.898033
Gm6439	predicted gene 6439	1.1418	1.58252	0.969343	0.814054	1.10598	1.57966	1.23122	1.16657	-0.0646569	0.947777	0.981698
Gm15527	predicted gene 15527	0	0	0.969343	0	0	0	0.323114	0	-0.323114	0.787905	0.927867
Dusp10	dual specificity phosphatase 10	8.22411	8.26314	7.53826	8.38622	8.43289	8.52345	8.0085	8.44752	0.439018	0.08194	0.245786
E030037K01Rik	RIKEN cDNA E030037K01 gene	0	0.99817	1.95377	2.0117	1.10598	0.996028	0.983979	1.37124	0.387258	0.8164	0.933154
Mgst1	microsomal glutathione S-transferase 1	11.6366	11.7123	11.4782	10.7738	10.0199	10.4099	11.609	10.4012	-1.20783	3.92e-09	1.1e-07
Ano8	anoctamin 8	7.94212	9.17376	7.99895	9.8524	9.52859	9.69769	8.37161	9.69289	1.32128	0.000102837	0.000963231
Ankrd27	ankyrin repeat domain 27 (VPS9 domain)	8.88867	9.6257	8.88943	9.17101	9.25147	9.06888	9.1346	9.16378	0.0291842	0.95294	0.983921
Gm22146	predicted gene, 22146	0	0	3.11496	0	0	0	1.03832	0	-1.03832	0.234787	0.523764
Card19	caspase recruitment domain family, member 19	10.0138	10.0638	10.3975	10.6445	10.6298	10.7652	10.1583	10.6798	0.521467	0.000768466	0.005326
Gm22149	predicted gene, 22149	0	0	0	0.814054	0	0	0	0.271351	0.271351	0.839626	0.933154
Gm22771	predicted gene, 22771	2.54257	1.58252	2.5335	2.26024	2.15619	2.57834	2.21953	2.33159	0.112058	0.937873	0.980249
Whamm	WAS protein homolog associated with actin, golgi membranes and microtubules	9.79805	9.18617	9.57472	8.98925	8.86245	9.1058	9.51965	8.98583	-0.533816	0.00473654	0.0247068
Gm22772	predicted gene, 22772	1.7711	0.99817	1.95377	0	0	0.996028	1.57435	0.332009	-1.24234	0.222032	0.504912
Ccdc149	coiled-coil domain containing 149	7.58224	7.64741	8.20032	7.8309	7.91115	8.05816	7.80999	7.9334	0.123415	0.683536	0.895286
Kmt2d	lysine (K)-specific methyltransferase 2D	12.1785	11.6855	12.0505	11.9988	12.0176	11.7059	11.9715	11.9074	-0.0640296	0.681684	0.893684
Ulbp1	UL16 binding protein 1	5.75726	7.31829	6.08866	6.412	6.31046	6.10069	6.38807	6.27438	-0.113687	0.522568	0.839572
Gm33280	predicted gene, 33280	3.2397	3.69706	1.54394	4.01461	4.44255	3.31477	2.8269	3.92398	1.09708	0.204989	0.476625
9430092D12Rik	RIKEN cDNA 9430092D12 gene	0	1.99725	0	0	2.48795	0	0.665751	0.829317	0.163566	0.838986	0.933154
Gm36958	predicted gene, 36958	2.54257	1.58252	1.54394	1.3313	2.15619	1.57966	1.88968	1.68905	-0.200629	0.793591	0.931497
Gm10344	predicted gene 10344	0	2.58191	0	0	0	2.80054	0.860637	0.933513	0.072876	0.924671	0.980249
---	---	4.34377	4.08402	4.52562	4.61486	4.2809	4.38474	4.3178	4.42683	0.109031	0.817087	0.933154
Gm16268	predicted gene 16268	0	0.99817	0	0	0	0	0.332723	0	-0.332723	0.787905	0.927867
Gm16165	predicted gene 16165	0	1.58252	0.969343	2.65696	1.10598	1.57966	0.850622	1.78087	0.930246	0.365636	0.698542
Gm14435	predicted gene 14435	4.65142	4.31845	4.74763	4.56951	4.89779	4.63622	4.5725	4.70117	0.128672	0.788731	0.928382
Ccdc159	coiled-coil domain containing 159	5.35109	6.3887	5.36576	6.9609	6.83213	7.16203	5.70185	6.98502	1.28317	0.000855855	0.00583207
Tgm3	transglutaminase 3, E polypeptide	4.58044	0	0	3.10122	0	1.99404	1.52681	1.69842	0.171608	0.730441	0.917282
Fbxo38	F-box protein 38	10.179	9.76618	10.0725	9.36263	9.59459	9.46779	10.0059	9.475	-0.530907	0.00100418	0.00668592
Abhd14a	abhydrolase domain containing 14A	7.36714	8.15117	7.72621	8.61546	8.59646	8.69597	7.74817	8.63596	0.887788	0.000214553	0.00181243
Zfand4	zinc finger, AN1-type domain 4	6.26705	6.87901	7.35624	7.55077	7.44185	7.35842	6.8341	7.45035	0.616245	0.0720518	0.223098
Bag2	BCL2-associated athanogene 2	10.8679	9.76121	10.3633	9.93182	9.83382	10.0337	10.3308	9.93312	-0.397672	0.0651085	0.206344
Sgsm1	small G protein signaling modulator 1	3.2397	4.90335	5.46296	4.70148	4.71995	4.31437	4.53534	4.5786	0.0432635	0.712034	0.909308
Slc39a5	solute carrier family 39 (metal ion transporter), member 5	0	0	0	1.71125	1.72461	0	0	1.14528	1.14528	0.349159	0.679807
Med26	mediator complex subunit 26	8.15251	7.12565	7.81481	7.80668	7.7035	7.76687	7.69765	7.75901	0.0613607	0.986186	0.994502
AC158537.1	---	1.7711	2.319	3.4032	2.65696	2.15619	2.99304	2.49777	2.60206	0.104297	0.971498	0.988172
CT009480.1	---	4.78369	4.31845	4.18928	4.47431	5.05609	5.03668	4.43047	4.85569	0.425221	0.361027	0.6936
Zfp949	zinc finger protein 949	7.55473	7.61107	7.97168	8.1754	8.32296	8.56192	7.71249	8.35343	0.640934	0.00295889	0.0166186
Nt5e	5 nucleotidase, ecto	9.96932	9.77442	10.3954	9.17101	9.13209	9.17197	10.0464	9.15836	-0.888039	1.41e-06	2.23e-05
Syncrip	synaptotagmin binding, cytoplasmic RNA interacting protein	12.0311	11.5657	11.7141	10.8247	10.9653	10.9079	11.7703	10.8993	-0.87098	2.23e-08	5.27e-07
Snx14	sorting nexin 14	9.3526	9.18864	9.23733	9.33071	9.38925	9.58825	9.25952	9.43607	0.176546	0.227071	0.512574
Gm12367	predicted gene 12367	2.2078	0	0	1.3313	2.75751	2.57834	0.735934	2.22238	1.48645	0.27045	0.577391
Neil3	nei like 3 (E. coli)	1.7711	5.48827	3.64332	3.71483	4.51706	4.24039	3.63423	4.15743	0.523196	0.843823	0.935807
Myadml2os	myeloid-associated differentiation marker-like 2, opposite strand	4.34377	2.319	3.94197	3.9453	3.35327	3.99254	3.53491	3.76371	0.228791	0.943999	0.980249
AI847159	expressed sequence AI847159	0	0	0	1.3313	0	0	0	0.443766	0.443766	0.717611	0.909308
Adgra3	adhesion G protein-coupled receptor A3	8.5322	9.09438	9.14758	9.45123	9.54871	9.27977	8.92472	9.42657	0.501851	0.0181987	0.0750156
Gm11784	predicted gene 11784	1.7711	2.80422	0	2.96778	2.15619	3.4522	1.52511	2.85872	1.33362	0.284502	0.597414
Mndal	myeloid nuclear differentiation antigen like	8.77803	9.72936	8.62117	10.21	10.585	10.0953	9.04285	10.2968	1.25394	3.52e-05	0.000380878
Rbpsuh-rs3	recombining binding protein suppressor of hairless (Drosophila), related sequence 3	6.79178	6.96215	6.31382	4.74292	5.52186	5.24018	6.68925	5.16832	-1.52093	2.08e-05	0.00024028
Ccdc22	coiled-coil domain containing 22	7.9632	8.70371	7.44616	8.47497	8.54397	8.5695	8.03769	8.52948	0.491787	0.181929	0.437928
Cacna1f	calcium channel, voltage-dependent, alpha 1F subunit	2.81411	2.58191	0	0	2.15619	1.57966	1.79867	1.24528	-0.553389	0.528431	0.841417
2900011O08Rik	RIKEN cDNA 2900011O08 gene	1.7711	1.99725	2.27256	1.71125	2.48795	2.31557	2.01364	2.17159	0.157951	0.854722	0.941711
Gm14044	predicted gene 14044	0	1.58252	2.75439	2.0117	1.10598	1.99404	1.44564	1.70391	0.258269	0.933811	0.980249
Hspb8	heat shock protein 8	13.6105	12.7168	13.3273	13.2948	13.4788	13.6	13.2182	13.4579	0.239683	0.381372	0.716239
AL589742.1	---	0	0	0.969343	0	0	1.99404	0.323114	0.664679	0.341565	0.691716	0.89922
Disp3	dispatched RND transporter family member 3	3.95222	2.80422	4.58441	0	0	0	3.78028	0	-3.78028	2.09e-05	0.000241407
Zfp729b	zinc finger protein 729b	7.33516	7.48821	6.89273	7.35756	7.62144	7.19177	7.2387	7.39026	0.151561	0.58461	0.875654
Sox5	SRY (sex determining region Y)-box 5	6.17368	6.35393	6.70679	6.29151	5.78569	5.66463	6.41147	5.91394	-0.497526	0.146371	0.375927
Defb19	defensin beta 19	0	0	0	1.71125	0	0	0	0.570415	0.570415	0.616793	0.875654
Fbn2	fibrillin 2	3.04254	6.37142	5.18761	5.00378	5.62653	5.51578	4.86719	5.38203	0.514837	0.986656	0.994666
Tmem150c	transmembrane protein 150C	7.16365	6.12567	6.49328	7.1499	7.59589	7.12139	6.5942	7.28906	0.694855	0.047038	0.16076
C330018D20Rik	RIKEN cDNA C330018D20 gene	6.9828	7.97363	6.70679	8.73322	8.85528	8.72338	7.22107	8.77063	1.54956	4.07e-06	5.72e-05
Megf10	multiple EGF-like-domains 10	2.54257	5.38874	4.69525	5.22462	4.95251	5.12156	4.20886	5.09956	0.890705	0.445601	0.780084
Lmnb1	lamin B1	8.94273	9.58506	8.72933	7.72631	7.40308	7.46782	9.0857	7.53241	-1.5533	5.72e-10	1.93e-08
Dlat	dihydrolipoamide S-acetyltransferase (E2 component of pyruvate dehydrogenase complex)	12.56	12.2552	12.5062	13.0008	13.2229	13.1893	12.4405	13.1376	0.697169	1.57e-06	2.46e-05
Prrc1	proline-rich coiled-coil 1	10.3818	10.3833	11.0122	10.1371	9.99402	10.157	10.5924	10.096	-0.496403	0.00830251	0.0395681
Gm19680	predicted gene, 19680	4.42705	5.38874	4.46433	4.56951	3.64668	4.38474	4.76004	4.20031	-0.559729	0.280048	0.590641
Mdh2	malate dehydrogenase 2, NAD (mitochondrial)	14.6807	14.313	14.4356	15.164	15.0723	15.4144	14.4764	15.2169	0.740449	1.46e-05	0.000176261
Psma4	proteasome (prosome, macropain) subunit, alpha type 4	11.707	11.516	11.5407	11.3218	11.3131	11.2964	11.5879	11.3104	-0.277467	0.016904	0.0710214
AC157650.3	---	5.26317	3.58161	5.46296	4.70148	5.10522	5.03668	4.76924	4.94779	0.17855	0.969638	0.988172
Dtnbp1	dystrobrevin binding protein 1	11.2609	10.6027	11.1681	11.0395	11.0216	11.4571	11.0106	11.1727	0.162162	0.479652	0.805554
Fam219b	family with sequence similarity 219, member B	9.25911	9.21066	8.3476	9.23593	9.26774	9.26585	8.93912	9.25651	0.317388	0.280505	0.591481
Wipi1	WD repeat domain, phosphoinositide interacting 1	10.6705	10.6384	11.0189	11.028	11.2298	11.3929	10.7759	11.2169	0.44097	0.00887336	0.0417697
Git2	G protein-coupled receptor kinase-interactor 2	10.4038	10.3013	10.6862	10.4384	10.2999	10.2612	10.4638	10.3332	-0.130604	0.365651	0.698542
Lman1	lectin, mannose-binding, 1	10.6349	11.0618	10.9196	10.9344	10.9102	10.9772	10.8721	10.9406	0.0685367	0.698128	0.90453
Gm11930	predicted gene 11930	0	0	0	0.814054	0	0	0	0.271351	0.271351	0.839626	0.933154
Gm13213	predicted gene 13213	0	0.99817	0.969343	0	1.10598	0.996028	0.655838	0.70067	0.0448321	0.983379	0.993085
Dlgap2	discs, large (Drosophila) homolog-associated protein 2	0	0	0	1.71125	0	0	0	0.570415	0.570415	0.616793	0.875654
Rnf152	ring finger protein 152	5.93848	6.33623	6.73301	6.87032	6.57744	6.18198	6.33591	6.54325	0.207339	0.557729	0.856861
Adamts12	a disintegrin-like and metallopeptidase (reprolysin type) with thrombospondin type 1 motif, 12	6.02122	7.31829	7.39781	6.48708	6.39191	6.20161	6.91244	6.3602	-0.552238	0.0773357	0.23556
Olfr77	olfactory receptor 77	5.58665	4.90335	4.74763	5.19506	4.7817	5.45166	5.07921	5.14281	0.0635938	0.902416	0.968365
Fam71e1	family with sequence similarity 71, member E1	4.65142	4.99645	4.18928	3.87249	4.71995	6.22097	4.61238	4.9378	0.325421	0.331377	0.658214
Sv2c	synaptic vesicle glycoprotein 2c	4.06051	4.16647	4.64089	4.14398	3.64668	4.51595	4.28929	4.10221	-0.187086	0.751475	0.927867
Nbeal2	neurobeachin-like 2	9.81747	9.98786	9.85844	9.96393	9.75712	9.79457	9.88793	9.83854	-0.0493833	0.727259	0.915375
4931428F04Rik	RIKEN cDNA 4931428F04 gene	6.07385	7.25375	5.8698	6.95209	7.44185	7.04739	6.39913	7.14711	0.747979	0.113952	0.313817
Fmr1	fragile X mental retardation syndrome 1	9.77638	9.24664	9.76781	8.80834	9.05292	8.65028	9.59695	8.83718	-0.759769	0.000154014	0.00135939
Gm35585	predicted gene, 35585	3.56793	2.9968	3.4032	0	1.72461	0	3.32264	0.574869	-2.74777	0.00689804	0.0339866
Adamtsl1	ADAMTS-like 1	5.62243	7.44757	6.78406	6.8131	6.91713	6.57709	6.61802	6.76911	0.151091	0.948619	0.982268
Adad2	adenosine deaminase domain containing 2	0	0	1.54394	0	0	0	0.514647	0	-0.514647	0.642125	0.875654
Gm10154	predicted gene 10154	5.16954	5.92714	5.49396	5.13408	4.71995	5.87482	5.53021	5.24295	-0.287262	0.586759	0.875654
Rit2	Ras-like without CAAX 2	0	0	0	1.71125	0	2.80054	0	1.50393	1.50393	0.13833	0.360904
Lypd3	Ly6/Plaur domain containing 3	0	2.319	0	0	0	0	0.773	0	-0.773	0.461623	0.792048
Phex	phosphate regulating endopeptidase homolog, X-linked	1.7711	0	2.27256	1.71125	2.48795	1.57966	1.34789	1.92629	0.578401	0.732735	0.918712
Syt4	synaptotagmin IV	3.2397	3.90347	3.26627	2.47219	1.72461	0	3.46981	1.39893	-2.07088	0.0407186	0.143367
---	---	0	1.99725	0.969343	3.33596	3.89039	2.80054	0.988866	3.3423	2.35343	0.0159112	0.0677595
Gm15631	predicted gene 15631	0	0	0	1.3313	0	0	0	0.443766	0.443766	0.717611	0.909308
Gm15596	predicted gene 15596	1.7711	0.99817	1.95377	0	1.10598	0.996028	1.57435	0.70067	-0.873675	0.383735	0.717962
Pisd-ps1	phosphatidylserine decarboxylase, pseudogene 1	9.73613	10.5851	9.73737	10.2847	10.3287	10.1006	10.0195	10.238	0.218459	0.496989	0.817905
H3f3a-ps1	H3 histone, family 3A, pseudogene 1	3.83514	3.90347	4.40033	3.79581	4.2809	3.6931	4.04631	3.92327	-0.123043	0.801438	0.933154
Mir7006	microRNA 7006	2.2078	1.58252	1.54394	0.814054	1.10598	0.996028	1.77809	0.972021	-0.806067	0.376992	0.711207
Gm22151	predicted gene, 22151	1.1418	0.99817	0	0	0	0	0.713325	0	-0.713325	0.610281	0.875654
Snord110	small nucleolar RNA, C/D box 110	1.1418	0.99817	0.969343	0	1.10598	0	1.03644	0.36866	-0.667779	0.527081	0.841417
Snord99	small nucleolar RNA, C/D box 99	1.1418	0.99817	0.969343	0.814054	1.10598	0.996028	1.03644	0.972021	-0.0644183	0.94473	0.980249
Gm19710	predicted gene, 19710	4.50578	4.08402	4.26311	4.47431	4.65544	4.74723	4.2843	4.62566	0.341356	0.468611	0.797323
Gm13056	predicted gene 13056	2.2078	2.319	3.11496	3.4404	4.19273	3.89947	2.54725	3.8442	1.29695	0.0648149	0.20565
2210414B05Rik	RIKEN cDNA 2210414B05 gene	0	1.58252	0	1.3313	0	1.57966	0.527507	0.970321	0.442813	0.756887	0.927867
Firre	functional intergenic repeating RNA element	10.2043	10.6863	10.9282	10.7151	10.7054	10.7174	10.6063	10.7127	0.106379	0.694488	0.901885
Gm16150	predicted gene 16150	0	1.99725	0	1.3313	2.15619	0	0.665751	1.1625	0.496744	0.765116	0.927867
Foxd2os	forkhead box D2, opposite strand	5.12035	4.80382	4.58441	3.87249	5.52186	4.74723	4.83619	4.71386	-0.122334	0.999035	0.999464
Mir6942	microRNA 6942	0	1.58252	1.95377	1.3313	1.72461	1.57966	1.17876	1.54519	0.366427	0.896031	0.966064
Gm27163	predicted gene 27163	0	0	0	0	0	1.57966	0	0.526555	0.526555	0.659841	0.87912
Gm28038	predicted gene, 28038	0	0.99817	0	0	0	0	0.332723	0	-0.332723	0.787905	0.927867
Gm13024	predicted gene 13024	1.1418	0	0	0	0	0	0.380602	0	-0.380602	0.787905	0.927867
Trgj4	T cell receptor gamma joining 4	0	0	0	0.814054	0	0	0	0.271351	0.271351	0.839626	0.933154
Gm27288	predicted gene, 27288	1.1418	0.99817	0.969343	0.814054	1.10598	0.996028	1.03644	0.972021	-0.0644183	0.94473	0.980249
Gm22154	predicted gene, 22154	1.7711	0.99817	1.54394	0	1.72461	0	1.43774	0.574869	-0.862867	0.535066	0.843174
n-R5s54	nuclear encoded rRNA 5S 54	0	0	0	0	1.10598	0	0	0.36866	0.36866	0.839626	0.933154
Rnu1b6	U1b6 small nuclear RNA	0	0	0	0	0	1.99404	0	0.664679	0.664679	0.554011	0.853566
Gm22165	predicted gene, 22165	0	0	0.969343	0	0	0	0.323114	0	-0.323114	0.787905	0.927867
5730455P16Rik	RIKEN cDNA 5730455P16 gene	8.93208	8.96501	9.37065	9.29633	9.36928	9.4617	9.08925	9.37577	0.286521	0.121585	0.329459
Gm43773	predicted gene 43773	1.1418	0	0	1.3313	0	0	0.380602	0.443766	0.0631643	0.900302	0.967335
C030032O16Rik	RIKEN cDNA C030032O16 gene	0	0	0	0	1.10598	0	0	0.36866	0.36866	0.839626	0.933154
Gm43820	predicted gene 43820	3.04254	2.319	4.46433	3.10122	4.19273	2.80054	3.27529	3.36483	0.0895385	0.914501	0.975646
Gm7902	predicted gene 7902	2.2078	2.9968	2.27256	2.47219	2.15619	2.57834	2.49239	2.40224	-0.0901461	0.874621	0.954061
Smim20	small integral membrane protein 20	9.31484	9.29784	9.64373	10.3574	10.5588	10.6467	9.4188	10.521	1.10215	1.27e-11	5.59e-10
Obscn	obscurin, cytoskeletal calmodulin and titin-interacting RhoGEF	15.0531	14.3636	14.7049	15.5397	15.5611	15.6362	14.7072	15.579	0.871806	2.21e-05	0.000253382
Gm379	predicted gene 379	0	0	0	0	0	2.57834	0	0.859446	0.859446	0.416468	0.750396
Zfp853	zinc finger protein 853	2.81411	1.58252	3.4032	2.47219	2.75751	0	2.59994	1.74323	-0.85671	0.524072	0.840875
Mir3470b	microRNA 3470b	0	0.99817	0	0	0	0	0.332723	0	-0.332723	0.787905	0.927867
Mapkapk2	MAP kinase-activated protein kinase 2	12.7692	12.4139	12.7804	12.7472	12.8607	12.9786	12.6545	12.8621	0.207631	0.195235	0.460832
Il10	interleukin 10	4.50578	4.52006	4.64089	2.0117	0	1.57966	4.55558	1.19712	-3.35845	2.43e-05	0.000275285
Dyrk3	dual-specificity tyrosine-(Y)-phosphorylation regulated kinase 3	5.35109	5.12573	4.98433	4.08075	2.48795	3.31477	5.15372	3.29449	-1.85923	0.00190074	0.0114593
Il19	interleukin 19	5.65733	0	3.4032	0	0	1.57966	3.02018	0.526555	-2.49362	0.0868899	0.257114
Lnx2	ligand of numb-protein X 2	9.50651	8.69679	9.47532	9.07084	9.04978	9.00887	9.22621	9.04316	-0.183046	0.321576	0.647533
Gm14760	predicted gene 14760	10.2579	10.0476	10.4488	10.5622	10.4923	10.8508	10.2514	10.6351	0.383664	0.0226318	0.0894301
Gm12247	predicted gene 12247	0	1.58252	0	1.3313	0	2.57834	0.527507	1.30321	0.775704	0.467427	0.796833
Gm8802	predicted gene 8802	0	0	0	0	0	0.996028	0	0.332009	0.332009	0.839626	0.933154
Gm16089	predicted gene 16089	6.58975	6.16631	6.77147	6.8228	6.95783	7.34965	6.50918	7.04342	0.534248	0.0700048	0.218165
Tmem61	transmembrane protein 61	0	0	1.54394	0	0	0	0.514647	0	-0.514647	0.642125	0.875654
Ccdc42os	coiled-coil domain containing 42, opposite strand	0	0	1.54394	0	1.72461	0	0.514647	0.574869	0.0602229	0.95376	0.983921
2610307P16Rik	RIKEN cDNA 2610307P16 gene	4.58044	3.69706	3.74989	4.70148	3.89039	4.07998	4.00913	4.22395	0.214821	0.689721	0.898033
Zfp472	zinc finger protein 472	6.53449	6.65459	6.73301	6.62645	6.57744	6.62148	6.64069	6.60846	-0.0322338	0.886697	0.961041
4930442H23Rik	RIKEN cDNA 4930442H23 gene	0	0	2.75439	0	1.10598	0	0.918131	0.36866	-0.549471	0.393114	0.726053
Rpia	ribose 5-phosphate isomerase A	8.6233	8.17626	7.26933	8.74856	8.38893	8.69597	8.02296	8.61115	0.588188	0.111796	0.309703
Gm15538	predicted gene 15538	0	2.319	0.969343	1.3313	1.72461	0.996028	1.09611	1.35064	0.254531	0.965568	0.988172
Gm12432	predicted gene 12432	2.81411	0	0	0	0	0	0.938036	0	-0.938036	0.323636	0.648535
Mcmdc2	minichromosome maintenance domain containing 2	4.42705	2.319	4.74763	0	2.98454	1.57966	3.83123	1.5214	-2.30983	0.0210622	0.0843185
Gm5276	predicted gene 5276	0	0	1.54394	1.3313	1.10598	0	0.514647	0.812426	0.29778	0.871728	0.95183
Serpina10	serine (or cysteine) peptidase inhibitor, clade A (alpha-1 antiproteinase, antitrypsin), member 10	0	0	1.95377	1.71125	0	0	0.651255	0.570415	-0.0808403	0.923458	0.980249
Acaa1a	acetyl-Coenzyme A acyltransferase 1A	10.0908	10.7445	10.2142	11.1663	10.823	11.1354	10.3498	11.0416	0.691711	0.000929504	0.00626165
Gm28035	predicted gene, 28035	9.99684	8.75123	8.88359	10.3296	10.1789	9.65205	9.21055	10.0535	0.842969	0.0178597	0.0739906
Mir7022	microRNA 7022	0	0	0.969343	0.814054	1.10598	0	0.323114	0.640012	0.316897	0.822966	0.933154
AC122426.1	---	0	0	0	1.3313	0	0	0	0.443766	0.443766	0.717611	0.909308
Gm42547	predicted gene 42547	7.19962	6.16631	6.70679	6.67006	6.86103	6.48399	6.69091	6.67169	-0.0192139	0.834263	0.933154
Zakit	sterile alpha motif and leucine zipper containing kinase AZK, intronic transcript	0	0	1.54394	0	0	0	0.514647	0	-0.514647	0.642125	0.875654
Gm43481	predicted gene 43481	5.12035	5.16636	5.66713	5.16489	5.95606	4.51595	5.31795	5.2123	-0.105649	0.968186	0.988172
9030607J07Rik	RIKEN cDNA 9030607J07 gene	0	0	1.95377	0	0	0	0.651255	0	-0.651255	0.538612	0.843174
Gm28568	predicted gene 28568	1.1418	0	0	0	0	0	0.380602	0	-0.380602	0.787905	0.927867
Gm2762	predicted gene 2762	0	1.58252	0	0	0	0	0.527507	0	-0.527507	0.632842	0.875654
AI593442	expressed sequence AI593442	4.25539	5.77776	5.29712	4.31858	4.89779	4.79969	5.11009	4.67202	-0.438073	0.26801	0.573554
Foxd1	forkhead box D1	0	2.58191	1.54394	2.0117	0	0	1.37528	0.670568	-0.704716	0.60583	0.875654
Gm2606	predicted pseudogene 2606	9.67994	9.35829	9.77414	9.82734	9.81549	10.1084	9.60412	9.91707	0.312953	0.0729329	0.225022
Spats2	spermatogenesis associated, serine-rich 2	8.65819	8.4142	8.68636	8.04481	8.03041	8.08483	8.58625	8.05335	-0.532898	0.00172933	0.0105951
Mterf2	mitochondrial transcription termination factor 2	6.22112	7.90924	7.23304	9.09504	9.54871	9.34741	7.12113	9.33039	2.20925	2.62e-09	7.53e-08
Ighv2-9	immunoglobulin heavy variable 2-9	0	2.58191	0	2.47219	0	0	0.860637	0.824064	-0.0365727	0.968751	0.988172
Igkv9-124	immunoglobulin kappa chain variable 9-124	3.04254	4.58145	2.27256	5.36393	1.72461	3.16286	3.29885	3.41713	0.11828	0.567871	0.865536
Gm22170	predicted gene, 22170	0	0	1.54394	0.814054	0	0	0.514647	0.271351	-0.243295	0.820288	0.933154
Vmn2r26	vomeronasal 2, receptor 26	1.7711	0	2.27256	0	0	0	1.34789	0	-1.34789	0.210814	0.486176
Gm9877	predicted gene 9877	0	0	0	2.26024	0	0	0	0.753414	0.753414	0.491422	0.813059
Ldah	lipid droplet associated hydrolase	9.05171	9.26079	8.79924	9.46832	9.59028	9.33857	9.03725	9.46572	0.428478	0.0169116	0.0710339
Tnfsf12	tumor necrosis factor (ligand) superfamily, member 12	7.9632	8.30923	7.60367	8.74856	8.79667	8.69942	7.9587	8.74822	0.789517	0.000437774	0.00329811
Cdkn1c	cyclin-dependent kinase inhibitor 1C (P57)	7.45904	7.4962	8.32623	9.01907	8.99544	9.03645	7.76049	9.01699	1.2565	2.7e-06	3.97e-05
Gm16897	predicted gene, 16897	5.06942	4.90335	5.06911	5.00378	5.69231	5.51578	5.01396	5.40396	0.389998	0.305192	0.624713
Carmn	cardiac mesoderm enhancer-associated non-coding RNA	7.59129	5.66884	8.27807	5.16489	5.52186	5.94637	7.1794	5.54437	-1.63503	0.000271471	0.00220651
Gdf7	growth differentiation factor 7	0	1.99725	0	2.82072	2.48795	1.99404	0.665751	2.43424	1.76849	0.166727	0.412694
Gpr160	G protein-coupled receptor 160	8.01122	6.69681	7.18636	6.53505	6.28936	6.38446	7.29813	6.40296	-0.895177	0.00582887	0.0294761
1700028E10Rik	RIKEN cDNA 1700028E10 gene	3.56793	4.99645	4.26311	4.70148	4.2809	4.8503	4.27583	4.61089	0.335064	0.661863	0.880647
Tmem147os	transmembrane protein 147, opposite strand	7.54544	6.86673	7.07802	6.48708	6.5422	6.8501	7.1634	6.62646	-0.536939	0.0507919	0.170418
Gm22175	predicted gene, 22175	1.1418	0.99817	0.969343	0.814054	1.10598	0.996028	1.03644	0.972021	-0.0644183	0.94473	0.980249
Prrt1	proline-rich transmembrane protein 1	6.66028	6.30017	6.68008	7.07886	7.19189	6.8376	6.54684	7.03612	0.489275	0.0623663	0.199616
Rn7s6	7S RNA 6	0	1.58252	1.54394	1.3313	3.35327	7.30498	1.04215	3.99652	2.95436	0.00549493	0.0280637
Mir5122	microRNA 5122	1.1418	0.99817	0.969343	0.814054	1.10598	0.996028	1.03644	0.972021	-0.0644183	0.94473	0.980249
AC139579.1	---	0	0.99817	0.969343	0.814054	1.10598	0.996028	0.655838	0.972021	0.316183	0.816605	0.933154
A930029G22Rik	RIKEN cDNA A930029G22 gene	2.2078	1.99725	4.0292	3.5378	3.89039	3.57767	2.74475	3.66862	0.923867	0.423683	0.758748
AC125206.3	---	0	0	0	0	0	1.57966	0	0.526555	0.526555	0.659841	0.87912
AC160334.1	---	0	0	0	1.71125	1.72461	0	0	1.14528	1.14528	0.349159	0.679807
Gm16845	predicted gene, 16845	3.95222	3.16667	5.43128	3.22336	2.48795	3.31477	4.18339	3.00869	-1.1747	0.0476231	0.16241
Dock3	dedicator of cyto-kinesis 3	6.22112	5.42269	6.16768	5.22462	4.58791	4.8992	5.93716	4.90391	-1.03325	0.0102889	0.0472211
Ralyl	RALY RNA binding protein-like	0	0	0	2.0117	0	0	0	0.670568	0.670568	0.544643	0.847629
Cplx3	complexin 3	2.81411	1.99725	1.54394	0	2.48795	0	2.11843	0.829317	-1.28912	0.434172	0.768465
Wdr34	WD repeat domain 34	6.66028	7.28176	6.90431	6.84199	6.72619	6.8376	6.94879	6.80193	-0.146856	0.521825	0.83878
Plekhg5	pleckstrin homology domain containing, family G (with RhoGef domain) member 5	9.32029	9.44136	10.0967	10.1545	9.95268	9.9375	9.61945	10.0149	0.39544	0.106874	0.299572
Gm17082	predicted gene 17082	3.41313	2.9968	3.84913	3.79581	3.77368	2.31557	3.41968	3.29502	-0.124663	0.975941	0.989518
Gm6679	predicted gene 6679	0	0	1.54394	0	0	0	0.514647	0	-0.514647	0.642125	0.875654
AC159208.2	---	3.04254	0	3.74989	0	0	0	2.26414	0	-2.26414	0.0118234	0.0530069
AC140376.1	---	0	0	2.27256	2.0117	0	0	0.75752	0.670568	-0.0869521	0.915231	0.975861
AC159625.1	---	0	0	0	0	1.10598	0	0	0.36866	0.36866	0.839626	0.933154
Gpr87	G protein-coupled receptor 87	0	2.58191	1.95377	2.0117	0	0	1.51189	0.670568	-0.841325	0.533617	0.843174
---	---	0	0	0	0	1.72461	0	0	0.574869	0.574869	0.625351	0.875654
Guca2a	guanylate cyclase activator 2a (guanylin)	0	0	2.27256	0	0	1.57966	0.75752	0.526555	-0.230965	0.751823	0.927867
Eps8	epidermal growth factor receptor pathway substrate 8	10.4593	10.2806	10.3872	9.085	9.3942	9.27515	10.3757	9.25145	-1.12424	9.56e-15	6.72e-13
Unc93a	unc-93 homolog A (C. elegans)	1.7711	0	2.75439	0	0	0	1.5085	0	-1.5085	0.130945	0.34741
Gipc1	GIPC PDZ domain containing family, member 1	8.91054	9.70543	9.36438	9.50942	9.32849	9.5789	9.32678	9.47227	0.145486	0.603957	0.875654
---	---	1.7711	2.80422	0	3.22336	2.98454	2.80054	1.52511	3.00281	1.47771	0.237603	0.528313
---	---	0	0	0	0.814054	2.15619	0	0	0.990081	0.990081	0.396583	0.729976
---	---	0	0	0	0	0	1.57966	0	0.526555	0.526555	0.659841	0.87912
---	---	1.1418	0.99817	0.969343	0.814054	1.10598	0.996028	1.03644	0.972021	-0.0644183	0.94473	0.980249
Ccdc160	coiled-coil domain containing 160	5.06942	3.16667	3.84913	3.9453	4.36399	4.45184	4.0284	4.25371	0.225306	0.957955	0.985855
Rgs9bp	regulator of G-protein signalling 9 binding protein	0	2.319	1.95377	2.0117	0	2.31557	1.42426	1.44242	0.0181683	0.984785	0.993805
Srp54a	signal recognition particle 54A	10.7943	10.8698	11.0222	10.5994	10.7867	10.813	10.8954	10.733	-0.16239	0.222335	0.50521
AC131690.1	---	0	0	0	1.71125	1.10598	2.31557	0	1.71093	1.71093	0.106928	0.299624
AC160405.3	---	0	2.319	0	2.26024	1.72461	1.99404	0.773	1.99296	1.21996	0.490412	0.812953
AC122860.2	---	3.70771	4.08402	4.52562	5.85452	5.48521	5.92291	4.10578	5.75421	1.64843	0.000171411	0.00149165
Ank1	ankyrin 1, erythroid	12.288	11.9775	12.3993	13.2826	13.4173	13.5802	12.2216	13.4267	1.2051	2.24e-13	1.31e-11
Ndufaf6	NADH dehydrogenase (ubiquinone) complex I, assembly factor 6	7.70411	7.4962	7.53081	8.54399	8.44725	8.72677	7.57704	8.57267	0.995633	6.11e-08	1.3e-06
Pparg	peroxisome proliferator activated receptor gamma	10.1609	8.74789	9.22352	9.25037	8.57045	8.50777	9.37744	8.7762	-0.601246	0.0472193	0.161362
Kat6a	K(lysine) acetyltransferase 6A	10.3502	9.99352	10.1955	9.68445	10.0118	9.44327	10.1797	9.71319	-0.466528	0.01563	0.0667518
9130017K11Rik	RIKEN cDNA 9130017K11 gene	2.2078	4.08402	1.95377	3.79581	4.44255	3.57767	2.74853	3.93868	1.19015	0.239552	0.531187
Gins4	GINS complex subunit 4 (Sld5 homolog)	8.12159	8.47613	8.13299	8.48416	8.35885	8.4678	8.24357	8.43694	0.193369	0.313938	0.637021
Gpat4	glycerol-3-phosphate acyltransferase 4	10.6566	10.731	10.6184	10.6729	10.3104	10.6104	10.6687	10.5313	-0.137429	0.372688	0.70642
Sugct	succinyl-CoA glutarate-CoA transferase	7.22311	6.95056	6.2426	5.16489	5.15273	4.51595	6.80543	4.94453	-1.8609	9.94e-07	1.64e-05
Sfrp1	secreted frizzled-related protein 1	6.96897	9.35829	8.99883	9.45902	9.55977	9.46981	8.44203	9.4962	1.05417	0.247179	0.542894
Gm10339	predicted gene 10339	0	0	0	0	1.72461	0.996028	0	0.906879	0.906879	0.50094	0.821491
Dleu2	deleted in lymphocytic leukemia, 2	8.0707	8.28637	6.86928	8.09368	8.44248	8.1819	7.74212	8.23935	0.497235	0.248987	0.545673
Gm5432	predicted gene 5432	0	2.319	0	1.3313	0	0	0.773	0.443766	-0.329234	0.675131	0.888514
Peg13	paternally expressed 13	10.3368	10.0339	10.4606	10.8193	10.7281	10.8516	10.2771	10.7997	0.522574	0.000749189	0.00521148
E230029C05Rik	RIKEN cDNA E230029C05 gene	4.06051	5.04084	4.40033	4.70148	4.51706	3.57767	4.50056	4.2654	-0.235157	0.69084	0.898456
Tgif2	TGFB-induced factor homeobox 2	6.64297	6.42265	6.41446	6.77366	7.13388	6.81229	6.49336	6.90661	0.413252	0.109945	0.306023
Ndufab1-ps	NADH dehydrogenase (ubiquinone) 1, alpha/beta subcomplex 1, pseudogene	6.12463	5.69685	5.72053	6.38608	6.43098	6.73359	5.84734	6.51688	0.669548	0.028705	0.108493
Mob4	MOB family member 4, phocein	10.0972	9.85432	9.90819	9.7121	9.92216	9.82178	9.95323	9.81868	-0.134556	0.336093	0.664684
Rftn2	raftlin family member 2	7.02351	7.6968	7.63181	8.08161	8.28615	8.3408	7.45071	8.23619	0.785482	0.00142293	0.00897761
Grin2b	glutamate receptor, ionotropic, NMDA2B (epsilon 2)	0	1.99725	0	0	0	0	0.665751	0	-0.665751	0.529599	0.841417
Olfr457	olfactory receptor 457	1.7711	2.319	2.27256	1.3313	2.15619	0	2.12089	1.1625	-0.95839	0.44456	0.779866
Phf2os1	PHD finger protein 2, opposite strand 1	4.90485	3.58161	4.52562	4.5227	4.2809	4.45184	4.33736	4.41848	0.081119	0.995405	0.997446
Hoxaas2	Hoxa cluster antisense RNA 2	0	3.58161	0	2.65696	2.15619	1.99404	1.19387	2.26906	1.07519	0.952354	0.983921
Rtn1	reticulon 1	5.06942	6.6688	5.63968	6.45003	6.95783	6.92285	5.79263	6.7769	0.984271	0.0480782	0.16351
Ccdc175	coiled-coil domain containing 175	1.1418	0	0	0	2.48795	1.57966	0.380602	1.35587	0.97527	0.295952	0.61251
Gm8577	predicted gene 8577	0	0	0	1.3313	0	0	0	0.443766	0.443766	0.717611	0.909308
BE692007	expressed sequence BE692007	5.75726	7.6968	6.44651	6.62645	6.03424	5.20171	6.63352	5.95414	-0.679387	0.131	0.347433
Drosha	drosha, ribonuclease type III	10.2043	10.0665	9.78828	10.475	10.5893	10.7619	10.0197	10.6087	0.589051	0.000307765	0.0024541
Pabpn1	poly(A) binding protein, nuclear 1	11.2395	11.0125	10.968	10.94	10.9368	10.9243	11.0733	10.9337	-0.13963	0.261972	0.564702
6030458C11Rik	RIKEN cDNA 6030458C11 gene	8.83631	9.17376	8.61765	8.6915	8.89424	9.00887	8.87591	8.86487	-0.0110393	0.902176	0.968197
Pdzd2	PDZ domain containing 2	11.9371	11.1276	12.3532	11.4833	11.6839	11.1607	11.806	11.4426	-0.363304	0.120195	0.326786
Slc22a17	solute carrier family 22 (organic cation transporter), member 17	6.24426	7.63298	6.89273	8.00279	7.67937	7.42672	6.92332	7.70296	0.779633	0.0523235	0.174264
Mir5131	microRNA 5131	1.1418	0.99817	0	0.814054	1.10598	0.996028	0.713325	0.972021	0.258696	0.850456	0.938964
Gm43300	predicted gene 43300	5.21712	3.80395	6.29634	3.62903	4.09882	3.57767	5.10581	3.76851	-1.3373	0.01017	0.0468118
Gm39147	predicted gene, 39147	0	0	1.54394	0	0	0	0.514647	0	-0.514647	0.642125	0.875654
---	---	1.7711	2.80422	3.4032	4.20456	4.19273	3.57767	2.6595	3.99165	1.33215	0.076239	0.233016
---	---	0	0	0.969343	0	0	0.996028	0.323114	0.332009	0.00889513	0.973412	0.988172
Gm35520	predicted gene, 35520	0	0	1.54394	0	0	0	0.514647	0	-0.514647	0.642125	0.875654
---	---	0	0	0	0	2.15619	0	0	0.718729	0.718729	0.520697	0.838189
---	---	0	1.58252	0	0	0	0	0.527507	0	-0.527507	0.632842	0.875654
Gm36964	predicted gene, 36964	0	0	0.969343	0	0	0	0.323114	0	-0.323114	0.787905	0.927867
AY702102	cDNA sequence AY702102	0	0	0	0	0	2.80054	0	0.933513	0.933513	0.34592	0.676764
---	---	0	0	2.5335	2.0117	0	0	0.8445	0.670568	-0.173932	0.822454	0.933154
Mir146	microRNA 146	1.1418	0	0	0	1.10598	0	0.380602	0.36866	-0.0119413	0.973412	0.988172
Zfp945	zinc finger protein 945	8.69646	8.40149	8.40172	8.9566	9.33365	9.22328	8.49989	9.17118	0.671285	0.000222509	0.00186921
Hyal6	hyaluronoglucosaminidase 6	0	1.99725	0	0	0	0	0.665751	0	-0.665751	0.529599	0.841417
Ing3	inhibitor of growth family, member 3	9.16217	8.17128	8.62467	8.30555	8.48022	7.95208	8.65271	8.24595	-0.406759	0.105008	0.295902
Wnt16	wingless-type MMTV integration site family, member 16	0	0	3.64332	2.65696	2.75751	2.31557	1.21444	2.57668	1.36224	0.805646	0.933154
Fam3c	family with sequence similarity 3, member C	8.85898	9.48418	9.03617	9.3119	9.3743	9.23285	9.12644	9.30635	0.179906	0.428673	0.762656
Auts2	autism susceptibility candidate 2	9.13766	8.46395	9.06484	9.67244	9.96104	9.94479	8.88882	9.85942	0.970607	6.29e-06	8.36e-05
Limk1	LIM-domain containing, protein kinase	8.67957	8.8037	8.77421	8.28466	8.17549	8.10582	8.75249	8.18865	-0.56384	0.000431517	0.00325826
Eln	elastin	9.86118	10.8292	11.4259	11.3128	10.9884	10.8026	10.7054	11.0346	0.329176	0.511086	0.83305
Pot1a	protection of telomeres 1A	7.74526	8.07317	7.72621	7.99423	8.40863	8.38439	7.84821	8.26242	0.414206	0.0530005	0.176151
Snrk	SNF related kinase	11.0004	10.4331	10.7757	11.6	11.088	11.1097	10.7364	11.2659	0.529512	0.0095038	0.0441476
Notch3	notch 3	10.185	10.3539	10.2701	11.2522	10.905	11.2423	10.2697	11.1332	0.86351	4.07e-09	1.13e-07
Cd84	CD84 antigen	8.61	9.40785	8.82994	6.64842	6.46901	6.20161	8.94926	6.43968	-2.50958	1.95e-21	3.06e-19
Tmem181a	transmembrane protein 181A	8.93564	8.96501	9.08534	8.76625	8.74335	8.5695	8.99533	8.69303	-0.302295	0.0491156	0.166236
Stox2	storkhead box 2	9.02523	8.86053	9.62635	8.70467	9.25147	8.95206	9.1707	8.9694	-0.201301	0.358483	0.69042
A530017D24Rik	RIKEN cDNA A530017D24 gene	7.82418	7.19604	7.5006	7.53317	7.59589	7.56194	7.50694	7.56367	0.0567268	0.874787	0.954173
Tmprss11a	transmembrane protease, serine 11a	0	0	0	1.71125	0	0	0	0.570415	0.570415	0.616793	0.875654
G530011O06Rik	RIKEN cDNA G530011O06 gene	8.56933	6.45581	6.2426	5.36393	5.36932	5.31417	7.08925	5.34914	-1.74011	0.000110371	0.00102368
Serpina1e	serine (or cysteine) peptidase inhibitor, clade A, member 1E	0	2.319	0	3.33596	2.75751	3.89947	0.773	3.33098	2.55798	0.0279908	0.106364
Ecm1	extracellular matrix protein 1	11.4476	11.8165	11.8291	11.1005	11.0571	10.8593	11.6977	11.0057	-0.692056	8.78e-06	0.00011198
Pmel	premelanosome protein	3.95222	3.58161	4.52562	3.62903	4.09882	2.99304	4.01982	3.57363	-0.446188	0.4637	0.79429
Cdk2	cyclin-dependent kinase 2	9.47751	9.26547	9.44392	8.78125	8.87312	8.59569	9.39563	8.75002	-0.645611	4.24e-05	0.000445213
Pias3	protein inhibitor of activated STAT 3	8.96728	9.47612	9.73251	9.25217	9.34648	9.36056	9.39197	9.31974	-0.0722348	0.609285	0.875654
Nudt17	nudix (nucleoside diphosphate linked moiety X)-type motif 17	4.42705	5.48827	6.08866	6.11339	5.84474	6.10069	5.33466	6.0196	0.684945	0.231995	0.519594
Cd63	CD63 antigen	12.3689	12.1022	12.0041	10.8581	10.6823	11.0392	12.1584	10.8599	-1.29854	7.05e-16	5.74e-14
Pex11b	peroxisomal biogenesis factor 11 beta	9.12525	8.81333	9.1427	9.01273	9.22115	9.33635	9.02709	9.19008	0.162986	0.355982	0.687615
Dgka	diacylglycerol kinase, alpha	9.05498	9.27711	8.92683	9.41644	9.71224	9.44738	9.08631	9.52535	0.439044	0.0100967	0.0464883
Polr3gl	polymerase (RNA) III (DNA directed) polypeptide G like	9.30936	9.61105	9.49844	10.0071	9.80251	9.9331	9.47295	9.91423	0.441285	0.00308134	0.01716
Tars2	threonyl-tRNA synthetase 2, mitochondrial (putative)	10.0372	9.90923	9.74383	10.3056	10.2893	10.3811	9.89674	10.3254	0.428617	0.00173396	0.0106186
Dnajc14	DnaJ heat shock protein family (Hsp40) member C14	10.167	10.3205	10.5729	10.2128	10.3118	10.0874	10.3535	10.204	-0.149463	0.314649	0.638122
Gm19950	predicted gene, 19950	0	0	2.75439	0	0	0	0.918131	0	-0.918131	0.336192	0.664684
Gm29683	predicted gene, 29683	1.7711	0	1.95377	2.96778	1.72461	0	1.24162	1.56413	0.322507	0.635717	0.875654
Mir5709	microRNA 5709	1.1418	0	0	0	0	0	0.380602	0	-0.380602	0.787905	0.927867
Actg1	actin, gamma, cytoplasmic 1	14.414	14.4627	13.754	13.6236	13.3796	13.2635	14.2102	13.4223	-0.787982	0.000163005	0.00142711
Ces2f	carboxylesterase 2F	0	2.319	0	0	0	0	0.773	0	-0.773	0.461623	0.792048
4833420G17Rik	RIKEN cDNA 4833420G17 gene	9.37375	9.38221	9.71945	9.20105	9.3818	9.44121	9.4918	9.34135	-0.150451	0.343148	0.673625
AC153912.4	---	4.50578	4.45594	4.74763	4.31858	4.65544	4.24039	4.56978	4.4048	-0.164981	0.717483	0.909308
AC152162.1	---	0	2.80422	2.5335	0.814054	0	0	1.77924	0.271351	-1.50789	0.108858	0.303507
AC135669.2	---	0	0	0	0	1.72461	1.99404	0	1.23955	1.23955	0.297018	0.613159
Ccdc137	coiled-coil domain containing 137	9.02856	8.45578	7.97718	8.2741	7.97202	7.84383	8.48717	8.02998	-0.457194	0.0731651	0.225532
Cox10	cytochrome c oxidase assembly protein 10	10.4051	10.1009	10.4646	10.8071	10.9477	11.0749	10.3235	10.9433	0.619712	6.71e-05	0.000663682
Cd177	CD177 antigen	10.3205	9.84965	8.48894	6.19029	2.98454	5.24018	9.55304	4.805	-4.74803	2.09e-06	3.16e-05
Opa3	optic atrophy 3	10.8225	10.4537	10.4309	11.1524	11.2961	11.3269	10.569	11.2584	0.689416	1.13e-05	0.000139839
Gm42895	predicted gene 42895	0	1.58252	1.95377	1.3313	3.35327	0	1.17876	1.56152	0.382759	0.532832	0.843174
Cep112it	centrosomal protein 112, intronic transcript	0	0	0	0	2.48795	0	0	0.829317	0.829317	0.449786	0.783455
Gm14703	predicted gene 14703	5.16954	4.99645	3.74989	4.47431	5.28655	5.20171	4.63863	4.98752	0.348894	0.605964	0.875654
Gm20236	predicted gene, 20236	2.54257	1.99725	2.94591	0.814054	3.35327	1.57966	2.49525	1.91566	-0.579585	0.777548	0.927867
Gm36969	predicted gene, 36969	0	0	0	0	1.10598	0	0	0.36866	0.36866	0.839626	0.933154
Gm44577	predicted gene 44577	0	1.58252	1.95377	0	0	0.996028	1.17876	0.332009	-0.846753	0.378348	0.712412
Rap1b	RAS related protein 1b	12.4897	11.9607	12.1309	10.78	10.798	10.7251	12.1938	10.7677	-1.42609	3.55e-18	3.9e-16
A930012L18Rik	RIKEN cDNA A930012L18 gene	0	3.99657	2.75439	3.4404	2.98454	3.79997	2.25032	3.4083	1.15798	0.620045	0.875654
Rps8-ps1	ribosomal protein S8, pseudogene 1	4.16124	4.45594	3.74989	3.62903	3.50742	3.57767	4.12236	3.57137	-0.550982	0.298371	0.615155
2610044O15Rik8	RIKEN cDNA 2610044O15 gene	8.3733	8.30469	7.94389	8.57587	8.92535	8.43086	8.20729	8.64403	0.436736	0.0395948	0.140159
Gm10250	predicted pseudogene 10250	11.2771	10.8133	11.0088	11.4544	11.5181	11.5756	11.0331	11.516	0.482923	0.00229416	0.01342
Iglj3	immunoglobulin lambda joining 3	1.1418	1.58252	0	3.10122	1.10598	0.996028	0.908109	1.73441	0.826301	0.332827	0.660141
Rspo3	R-spondin 3	5.39312	4.08402	5.1097	4.47431	2.75751	2.57834	4.86228	3.27005	-1.59223	0.0398677	0.140895
Echdc1	enoyl Coenzyme A hydratase domain containing 1	8.24721	8.93886	7.73272	9.60099	8.80413	9.13926	8.30626	9.18146	0.875198	0.00859331	0.0407044
Gm10097	predicted gene 10097	0	1.99725	1.54394	3.10122	2.48795	2.99304	1.1804	2.86074	1.68034	0.105904	0.297681
Ptprk	protein tyrosine phosphatase, receptor type, K	10.1518	9.57943	10.0802	9.34423	9.59244	9.35838	9.93712	9.43168	-0.50544	0.00629631	0.0313687
Daw1	dynein assembly factor with WDR repeat domains 1	0	2.9968	0	2.26024	0	1.57966	0.998932	1.27997	0.281037	0.903042	0.968673
Gm23553	predicted gene, 23553	0	0	0.969343	0	0	0	0.323114	0	-0.323114	0.787905	0.927867
Gpr21	G protein-coupled receptor 21	4.06051	2.58191	2.94591	3.33596	4.2809	3.6931	3.19611	3.76999	0.573873	0.467941	0.79716
Cdh22	cadherin 22	6.94091	6.28179	6.46227	6.49923	5.52186	6.93462	6.56166	6.31857	-0.243088	0.702214	0.907275
9030619P08Rik	RIKEN cDNA 9030619P08 gene	2.54257	0	1.54394	2.26024	1.72461	2.31557	1.36217	2.10014	0.737969	0.651407	0.87912
Gm12268	predicted gene 12268	0	0	0	0	2.15619	0	0	0.718729	0.718729	0.520697	0.838189
Spag7	sperm associated antigen 7	10.6886	11.1288	11.1469	11.4112	11.3326	11.6525	10.9881	11.4654	0.477346	0.00701254	0.0344555
Psmb6	proteasome (prosome, macropain) subunit, beta type 6	11.5899	11.5101	11.6254	11.6761	11.4761	11.7494	11.5751	11.6339	0.0587527	0.626762	0.875654
Rtn3	reticulon 3	11.217	11.5258	10.9954	11.5247	11.5118	11.5068	11.246	11.5144	0.268411	0.121543	0.329448
Atl3	atlastin GTPase 3	10.5745	10.6907	10.893	9.99642	9.75712	9.6768	10.7194	9.81012	-0.909274	6e-09	1.61e-07
Cxcl14	chemokine (C-X-C motif) ligand 14	10.7756	8.92412	9.53987	9.31362	9.16433	9.03645	9.74652	9.17147	-0.575052	0.0357485	0.129031
---	---	3.83514	0	1.95377	1.3313	1.72461	0	1.92964	1.01864	-0.911001	0.215965	0.495122
Ddx46	DEAD (Asp-Glu-Ala-Asp) box polypeptide 46	11.1641	10.7867	11.2007	10.2465	10.5489	10.3252	11.0505	10.3735	-0.676982	3.9e-05	0.000414249
Caml	calcium modulating ligand	8.66678	8.63659	8.70635	8.24555	8.21519	8.167	8.66991	8.20925	-0.46066	0.00285034	0.0161285
Ctla2b	cytotoxic T lymphocyte-associated protein 2 beta	9.25056	7.68286	8.8208	7.13441	6.72619	6.78653	8.58474	6.88238	-1.70236	3.45e-07	6.32e-06
H2-Q7	histocompatibility 2, Q region locus 7	9.99684	9.43305	8.67626	11.4133	10.1674	10.6214	9.36872	10.734	1.36531	9.69e-05	0.00091689
Gm14169	predicted gene 14169	4.90485	2.319	3.4032	2.47219	1.72461	2.31557	3.54235	2.17079	-1.37156	0.041732	0.146154
Gm2415	predicted gene 2415	4.06051	6.47211	5.02734	6.45003	6.39191	6.40153	5.18666	6.41449	1.22784	0.097786	0.280101
9530068E07Rik	RIKEN cDNA 9530068E07 gene	11.4912	11.3892	11.5263	11.4575	11.486	11.5117	11.4689	11.485	0.0161611	0.891352	0.963639
Edc4	enhancer of mRNA decapping 4	10.6854	10.3328	11.0169	10.465	10.28	10.5466	10.6784	10.4305	-0.247834	0.163442	0.406873
Lrrk2	leucine-rich repeat kinase 2	8.09637	8.74454	8.45389	8.60426	8.65124	8.4515	8.4316	8.569	0.137399	0.588391	0.875654
Macrod1	MACRO domain containing 1	11.4476	10.8442	11.084	11.9132	11.7399	12.1278	11.1253	11.927	0.801716	3.58e-05	0.000385889
1110004E09Rik	RIKEN cDNA 1110004E09 gene	8.4844	8.75123	8.8269	9.21952	8.85169	8.95206	8.68751	9.00776	0.320247	0.0787413	0.238666
Synj1	synaptojanin 1	9.9641	9.80531	10.0401	9.32731	9.53757	9.25884	9.93649	9.37457	-0.561914	0.000181796	0.00156826
Ifnar2	interferon (alpha and beta) receptor 2	10.3766	10.3205	10.0815	10.0271	10.081	9.98499	10.2595	10.0311	-0.228473	0.0909199	0.265513
Paxbp1	PAX3 and PAX7 binding protein 1	10.1333	9.91371	10.2923	9.89093	9.99076	9.92574	10.1131	9.93581	-0.177293	0.210673	0.486148
Ighv4-1	immunoglobulin heavy variable 4-1	2.2078	0	1.54394	3.33596	1.72461	3.6931	1.25058	2.91789	1.66731	0.0857539	0.254433
Mis18a	MIS18 kinetochore protein A	7.37764	7.10489	7.43822	6.64842	6.61185	6.48399	7.30692	6.58142	-0.725496	0.00229275	0.0134143
Zfp598	zinc finger protein 598	10.8836	9.98218	10.6592	9.97484	10.0625	9.94479	10.5083	9.99404	-0.51428	0.0117982	0.052931
AC157515.1	---	5.85072	5.48827	5.72053	5.60772	5.36932	5.69264	5.68651	5.55656	-0.129948	0.712921	0.909308
N4bp2l1	NEDD4 binding protein 2-like 1	7.67033	7.45579	8.242	6.73311	6.61185	6.72004	7.78937	6.68833	-1.10104	3.14e-05	0.000344706
Chst1	carbohydrate (keratan sulfate Gal-6) sulfotransferase 1	7.24623	8.07317	7.53081	7.62468	7.06104	7.19177	7.61673	7.2925	-0.324235	0.237648	0.528313
Ripk2	receptor (TNFRSF)-interacting serine-threonine kinase 2	8.75	7.89722	7.12828	7.5566	7.8331	7.6503	7.92517	7.68	-0.245169	0.283511	0.595789
Pex16	peroxisomal biogenesis factor 16	8.93208	8.80692	8.79303	9.07287	8.30204	8.80584	8.84401	8.72692	-0.117089	0.714156	0.909308
Duoxa2	dual oxidase maturation factor 2	0	0	0	0	1.72461	2.31557	0	1.34673	1.34673	0.232112	0.519594
Duoxa1	dual oxidase maturation factor 1	1.7711	0	2.27256	2.0117	2.98454	2.99304	1.34789	2.66309	1.31521	0.250112	0.547393
Sord	sorbitol dehydrogenase	11.9228	10.93	11.4229	11.8663	11.9782	12.0894	11.4252	11.978	0.552733	0.0327317	0.120233
Mir6981	microRNA 6981	1.1418	0.99817	0.969343	0.814054	1.10598	0.996028	1.03644	0.972021	-0.0644183	0.94473	0.980249
Gm27295	predicted gene, 27295	0	0.99817	1.95377	0.814054	0	0	0.983979	0.271351	-0.712628	0.492607	0.813964
Mir6360	microRNA 6360	0	0	0.969343	0	0	0	0.323114	0	-0.323114	0.787905	0.927867
Adgre1	adhesion G protein-coupled receptor E1	7.03683	9.88051	7.99895	7.97697	8.51244	8.13673	8.30543	8.20872	-0.0967157	0.483523	0.809585
S100pbp	S100P binding protein	9.43539	9.14355	9.88937	8.74347	8.99218	8.75361	9.48943	8.82975	-0.659682	0.00158134	0.00981488
Gm22192	predicted gene, 22192	1.7711	0.99817	1.54394	0	0	0	1.43774	0	-1.43774	0.194343	0.459523
Mir6946	microRNA 6946	1.1418	1.58252	1.54394	1.71125	1.10598	0.996028	1.42276	1.27108	-0.151671	0.902634	0.968366
Anxa4	annexin A4	9.72383	10.4517	10.0015	9.64127	9.53308	9.73521	10.059	9.63652	-0.422469	0.0263612	0.101341
Nfu1	NFU1 iron-sulfur cluster scaffold	9.73817	10.0462	10.0904	10.3125	10.4152	10.4422	9.95824	10.39	0.431739	0.00404646	0.0216514
Gfpt1	glutamine fructose-6-phosphate transaminase 1	9.83664	10.1243	9.4459	9.2323	9.22115	9.1032	9.80229	9.18555	-0.616744	0.00111902	0.00733924
Tgfa	transforming growth factor alpha	6.9828	7.16629	6.63907	6.11339	5.92902	5.79954	6.92939	5.94732	-0.982069	0.000638375	0.00454925
Pcyox1	prenylcysteine oxidase 1	9.8078	10.6758	10.22	10.9659	10.9728	10.9899	10.2345	10.9762	0.741682	0.00101567	0.00675203
Gm25821	predicted gene, 25821	1.1418	0	0.969343	0.814054	0	0	0.703716	0.271351	-0.432365	0.750172	0.927867
Bbs1	Bardet-Biedl syndrome 1 (human)	7.01007	7.23477	7.03651	7.67372	7.4796	7.40994	7.09378	7.52109	0.427304	0.0494098	0.166964
A530013C23Rik	RIKEN cDNA A530013C23 gene	7.21142	3.90347	6.77147	4.61486	4.09882	5.48408	5.96212	4.73258	-1.22953	0.0158975	0.0677226
Zdhhc24	zinc finger, DHHC domain containing 24	7.28022	7.45579	7.30473	7.10293	7.15736	7.22092	7.34691	7.1604	-0.186509	0.37001	0.703764
---	---	3.04254	3.16667	3.52825	3.62903	3.77368	3.16286	3.24582	3.52185	0.276033	0.658807	0.87912
Angpt1	angiopoietin 1	6.77599	9.70543	6.55338	10.232	10.4394	10.4494	7.67826	10.3736	2.69534	0.0457489	0.157313
---	---	5.21712	4.80382	0	5.00378	5.00523	5.5468	3.34031	5.18527	1.84496	0.388749	0.723834
Gm5846	predicted gene 5846	4.06051	4.69692	4.52562	3.9453	3.18065	3.79997	4.42768	3.64197	-0.785709	0.155944	0.393752
Gm36975	predicted gene, 36975	0	0	0	1.3313	0	0	0	0.443766	0.443766	0.717611	0.909308
Gm36976	predicted gene, 36976	1.1418	0.99817	0.969343	0	0	0.996028	1.03644	0.332009	-0.70443	0.531421	0.841927
Wdr49	WD repeat domain 49	0	2.319	1.54394	0	0	0	1.28765	0	-1.28765	0.227378	0.512747
---	---	3.04254	0	2.27256	2.0117	0	3.31477	1.7717	1.77549	0.00379101	0.929578	0.980249
Oxr1	oxidation resistance 1	10.5043	10.1763	10.3893	10.5433	10.7858	10.626	10.3566	10.6517	0.295059	0.0467289	0.159902
Gm22193	predicted gene, 22193	0	0	0	0	1.10598	0	0	0.36866	0.36866	0.839626	0.933154
Btbd19	BTB (POZ) domain containing 19	7.68732	7.16629	7.92695	7.09495	7.28011	7.16203	7.59352	7.17903	-0.414491	0.0852543	0.253372
Gm23567	predicted gene, 23567	0	0	0	0	0	0.996028	0	0.332009	0.332009	0.839626	0.933154
Kncn	kinocilin	3.04254	0	2.5335	0	0	0	1.85868	0	-1.85868	0.0516202	0.172567
Kti12	KTI12 homolog, chromatin associated	9.14075	8.45987	8.37283	8.6915	8.51699	8.5117	8.65782	8.5734	-0.0844189	0.60918	0.875654
Faddos	Fas (TNFRSF6)-associated via death domain, opposite strand	0	2.319	0	1.71125	0	1.57966	0.773	1.09697	0.32397	0.963005	0.988172
Lrp8os2	low density lipoprotein receptor-related protein 8, apolipoprotein e receptor, opposite strand 2	0	0	1.54394	0	0	0	0.514647	0	-0.514647	0.642125	0.875654
Gm22200	predicted gene, 22200	2.2078	1.58252	0.969343	2.0117	1.72461	1.57966	1.58656	1.77199	0.185436	0.884934	0.959853
Gm23111	predicted gene, 23111	1.7711	0	0.969343	0.814054	0	0.996028	0.91348	0.603361	-0.31012	0.717962	0.909418
Gm22204	predicted gene, 22204	3.2397	2.58191	4.26311	2.65696	1.10598	1.99404	3.36157	1.91899	-1.44258	0.0800338	0.241681
Gm23119	predicted gene, 23119	1.1418	1.99725	1.54394	2.65696	2.75751	3.6931	1.561	3.03585	1.47485	0.0754841	0.231245
Gm24975	predicted gene, 24975	0	0.99817	0	0	1.10598	0	0.332723	0.36866	0.035937	0.973412	0.988172
Srsf2	serine/arginine-rich splicing factor 2	12.8168	12.0469	11.938	11.8379	11.8925	11.739	12.2672	11.8231	-0.444136	0.0318325	0.117816
Mks1	Meckel syndrome, type 1	6.51558	7.26315	7.48525	7.29625	7.24765	7.42672	7.088	7.32354	0.235547	0.542168	0.846781
Pomt2	protein-O-mannosyltransferase 2	8.76608	9.00477	8.55657	8.68885	8.9491	8.62506	8.77581	8.75434	-0.0214705	0.885438	0.960124
Tspan8	tetraspanin 8	4.34377	6.35393	4.0292	5.77685	4.19273	5.07974	4.90897	5.01644	0.10747	0.83442	0.933154
Gm6181	predicted pseudogene 6181	3.41313	3.58161	3.26627	4.37238	4.89779	5.03668	3.42033	4.76895	1.34862	0.00933743	0.0435416
Svip	small VCP/p97-interacting protein	9.23042	8.54324	8.53437	9.49281	9.56636	9.6086	8.76934	9.55593	0.786582	0.000561676	0.00408334
Cds1	CDP-diacylglycerol synthase 1	8.31437	8.17626	7.89828	8.01974	7.50728	8.21124	8.12963	7.91275	-0.216881	0.423486	0.758484
Bmp3	bone morphogenetic protein 3	5.06942	6.64023	5.39889	6.86094	5.62653	5.87482	5.70285	6.12076	0.417917	0.484531	0.810028
Prkg2	protein kinase, cGMP-dependent, type II	3.04254	4.75136	5.14918	3.79581	3.89039	3.16286	4.31436	3.61635	-0.698008	0.156805	0.395254
Fgf5	fibroblast growth factor 5	2.54257	1.99725	0	2.26024	0	2.31557	1.51328	1.52527	0.0119943	0.981908	0.992223
Antxr2	anthrax toxin receptor 2	10.4506	10.8512	10.3088	11.6185	11.7905	11.7524	10.5369	11.7205	1.18361	1.1e-11	4.88e-10
Gm13196	predicted gene 13196	0	0	0	0.814054	0	0	0	0.271351	0.271351	0.839626	0.933154
Hnrnpa1	heterogeneous nuclear ribonucleoprotein A1	13.0364	12.7496	12.8298	12.024	12.0116	12.1566	12.8719	12.0641	-0.807828	1.99e-09	5.95e-08
Gm13392	predicted gene 13392	1.1418	0.99817	1.95377	1.3313	1.72461	1.57966	1.36458	1.54519	0.18061	0.91089	0.97334
Gm11235	predicted gene 11235	0	0	0	0	0	1.57966	0	0.526555	0.526555	0.659841	0.87912
Gm11449	predicted gene 11449	1.7711	1.58252	2.75439	0.814054	1.72461	1.57966	2.036	1.37278	-0.663229	0.430006	0.764091
Scarna2	small Cajal body-specific RNA 2	0	1.58252	1.54394	1.3313	2.75751	4.38474	1.04215	2.82452	1.78236	0.0431481	0.150002
Bex3	brain expressed X-linked 3	6.14936	8.00198	7.50821	7.54493	7.14567	7.58454	7.21985	7.42505	0.205198	0.943379	0.980249
Mid1	midline 1	10.4481	8.25374	9.88353	7.99423	9.47352	7.89295	9.52846	8.45357	-1.07489	0.134489	0.3539
Klhl35	kelch-like 35	3.2397	1.99725	3.26627	0.814054	1.72461	0	2.83441	0.846221	-1.98819	0.039672	0.14035
G2e3	G2/M-phase specific E3 ubiquitin ligase	7.92073	8.02977	7.75208	7.09495	7.24765	7.28672	7.90086	7.20977	-0.691089	0.000655835	0.00465288
Cops4	COP9 signalosome subunit 4	10.7475	10.569	10.7454	10.7021	10.8385	10.8831	10.6873	10.8079	0.120568	0.346264	0.677185
Sgcg	sarcoglycan, gamma (dystrophin-associated glycoprotein)	10.8827	11.5836	11.4552	12.2467	12.2845	12.4551	11.3072	12.3288	1.02157	4.45e-07	7.91e-06
Wdr38	WD repeat domain 38	2.2078	4.45594	1.54394	2.82072	2.75751	2.99304	2.73589	2.85709	0.121197	0.618959	0.875654
Golga7b	golgi autoantigen, golgin subfamily a, 7B	2.54257	3.58161	2.5335	5.25358	4.84091	5.12156	2.88589	5.07201	2.18612	0.000156421	0.00137782
9430015G10Rik	RIKEN cDNA 9430015G10 gene	7.11425	7.43099	7.53826	7.25388	6.5422	6.95789	7.36117	6.91799	-0.443174	0.124339	0.334641
Gatad1	GATA zinc finger domain containing 1	10.3857	10.16	10.2384	10.5249	10.7792	10.5428	10.2614	10.6156	0.354227	0.0116494	0.0523877
Mark3	MAP/microtubule affinity regulating kinase 3	10.8358	10.5238	10.8791	10.2961	10.5118	10.5264	10.7463	10.4447	-0.301535	0.0456754	0.157149
Pcdhb18	protocadherin beta 18	4.65142	4.75136	5.26153	5.33712	5.59247	5.24018	4.8881	5.38993	0.501823	0.238598	0.529613
Grin3b	glutamate receptor, ionotropic, NMDA3B	6.12463	5.45585	5.96136	6.14464	6.03424	6.29593	5.84728	6.15827	0.310992	0.371763	0.705592
Zfp995	zinc finger protein 995	4.65142	5.95059	6.18678	5.6519	5.19873	5.07974	5.59626	5.31012	-0.286141	0.388215	0.723272
Gm12366	predicted gene 12366	5.01662	5.08391	5.02734	5.28197	5.05609	5.31417	5.04262	5.21741	0.174786	0.633204	0.875654
Gm22224	predicted gene, 22224	0	0	0.969343	0	0	0	0.323114	0	-0.323114	0.787905	0.927867
Zbtb2	zinc finger and BTB domain containing 2	7.66176	7.63298	7.7775	7.72114	7.56987	7.72	7.69075	7.67034	-0.0204074	0.920796	0.979259
Gm13582	predicted gene 13582	0	0	0	2.0117	2.75751	2.31557	0	2.36159	2.36159	0.0172281	0.0720039
Fign	fidgetin	6.41717	6.68287	6.41446	7.51534	7.89727	7.73355	6.50484	7.71539	1.21055	3.89e-07	7.06e-06
Bola3	bolA-like 3 (E. coli)	10.9361	10.3484	10.7333	11.1838	11.3079	11.3556	10.6726	11.2824	0.609853	0.000699968	0.00492219
Gm42726	predicted gene 42726	3.56793	2.319	4.0292	0	0	1.99404	3.30538	0.664679	-2.6407	0.0126639	0.0561499
Rpl30	ribosomal protein L30	12.288	12.4912	12.3677	12.1366	12.1834	12.1692	12.3823	12.1631	-0.21925	0.0588649	0.190783
Gm22229	predicted gene, 22229	0	0	0	0.814054	0	0	0	0.271351	0.271351	0.839626	0.933154
Snora62	small nucleolar RNA, H/ACA box 62	2.2078	2.319	0.969343	0	0	0.996028	1.83205	0.332009	-1.50004	0.125818	0.337055
Zfp965	zinc finger protein 965	4.65142	5.20589	5.49396	5.49097	5.65979	5.63606	5.11709	5.59561	0.47852	0.268751	0.574858
Gm4724	predicted gene 4724	4.84554	6.10492	4.74763	5.73639	6.13231	5.79954	5.2327	5.88941	0.656716	0.25594	0.555812
Pcnt	pericentrin (kendrin)	10.5127	10.7106	11.3277	10.9866	11.2039	11.0527	10.8503	11.0811	0.230761	0.379867	0.71453
Gmcl1	germ cell-less, spermatogenesis associated 1	7.13916	7.8851	7.98265	7.73661	7.45138	7.63594	7.66897	7.60798	-0.0609951	0.698954	0.905301
Mxd1	MAX dimerization protein 1	10.4728	9.84809	9.87913	7.66296	7.85481	8.06889	10.0667	7.86222	-2.20446	1.02e-23	2.03e-21
Ftcd	formiminotransferase cyclodeaminase	3.04254	2.80422	5.18761	3.22336	3.18065	2.57834	3.67812	2.99412	-0.684008	0.167702	0.414152
Gm11008	predicted gene 11008	5.62243	3.31863	5.1097	3.10122	3.77368	3.57767	4.68359	3.48419	-1.1994	0.0257896	0.099497
Gm9625	predicted gene 9625	6.07385	6.95056	6.53859	6.0975	5.72411	6.4184	6.521	6.08001	-0.440993	0.190972	0.453563
Snrnp27	small nuclear ribonucleoprotein 27 (U4/U6.U5)	9.34994	9.73949	9.34113	9.74816	9.88922	9.74192	9.47685	9.7931	0.316248	0.0660553	0.208633
Zfp968	zinc finger protein 968	4.96182	4.24446	4.94	4.26269	4.44255	4.38474	4.71542	4.36333	-0.352095	0.410385	0.743716
2610507B11Rik	RIKEN cDNA 2610507B11 gene	12.8372	12.8263	13.0265	13.0356	13.1829	13.1968	12.8966	13.1384	0.241776	0.0613989	0.197144
Gm13541	predicted gene 13541	1.7711	0	0	2.0117	2.15619	2.31557	0.590366	2.16115	1.57079	0.197653	0.464882
Gm5353	predicted gene 5353	0	0	0	0	1.72461	1.99404	0	1.23955	1.23955	0.297018	0.613159
Gm12503	predicted gene 12503	3.83514	1.99725	2.27256	1.3313	2.48795	2.57834	2.70165	2.13253	-0.569123	0.415117	0.749119
Gm12120	predicted gene 12120	0	0	0	0	2.48795	0	0	0.829317	0.829317	0.449786	0.783455
Gypa	glycophorin A	0	4.64034	3.94197	2.47219	3.35327	3.31477	2.86077	3.04674	0.185973	0.459866	0.792048
Scarf1	scavenger receptor class F, member 1	9.2041	9.05974	8.92114	9.95404	9.69429	9.61959	9.06166	9.75597	0.694316	2.09e-05	0.000241023
Sltm	SAFB-like, transcription modulator	11.0046	10.7454	10.6061	10.4455	10.6193	10.5185	10.7854	10.5278	-0.257585	0.0781068	0.23717
Nedd4	neural precursor cell expressed, developmentally down-regulated 4	12.6691	13.4205	13.0683	13.4552	13.6163	13.5182	13.0526	13.5299	0.47727	0.0259627	0.0999994
Rnf111	ring finger 111	10.2451	9.75789	10.0853	9.40196	9.37179	9.24472	10.0294	9.33949	-0.689925	3.54e-05	0.000383357
Rsl24d1	ribosomal L24 domain containing 1	9.98829	9.78588	9.75667	9.62889	9.63906	9.77996	9.84361	9.68264	-0.160978	0.245905	0.540821
Ccnb2	cyclin B2	4.90485	6.26317	4.58441	5.03747	4.89779	4.79969	5.25081	4.91165	-0.339162	0.312082	0.634231
Gm13134	predicted gene 13134	0	0	0	0	1.72461	0	0	0.574869	0.574869	0.625351	0.875654
Gm16135	predicted gene 16135	1.7711	0	1.54394	0	0	0	1.10501	0	-1.10501	0.353994	0.685251
Far1os	fatty acyl CoA reductase 1, opposite strand	0	0	0	0.814054	0	0	0	0.271351	0.271351	0.839626	0.933154
Gm11789	predicted gene 11789	0	0	1.95377	0	0	0	0.651255	0	-0.651255	0.538612	0.843174
Crocc2	ciliary rootlet coiled-coil, rootletin family member 2	4.16124	5.31836	4.40033	4.82238	3.64668	4.31437	4.62664	4.26115	-0.365495	0.509927	0.83178
Gbp2b	guanylate binding protein 2b	0	2.58191	0	4.65882	0	2.80054	0.860637	2.48645	1.62582	0.129785	0.345359
Dnm3	dynamin 3	6.71101	7.30924	8.34335	7.57392	7.88326	7.68557	7.45453	7.71425	0.259714	0.787957	0.927867
Klhdc4	kelch domain containing 4	9.392	9.54709	9.38313	9.04829	8.76644	9.16198	9.44074	8.99224	-0.4485	0.00759155	0.0368463
Daam2	dishevelled associated activator of morphogenesis 2	8.78199	9.12305	9.45774	9.66032	9.61594	9.67329	9.12093	9.64985	0.528925	0.00977384	0.0451872
Plekha1	pleckstrin homology domain containing, family A (phosphoinositide binding specific) member 1	11.2344	10.5576	11.2617	10.4557	10.5083	10.3485	11.0179	10.4375	-0.580398	0.00237827	0.0138266
Mrps28	mitochondrial ribosomal protein S28	8.4844	8.75457	8.77105	9.4371	9.20151	9.24945	8.67001	9.29602	0.626014	0.000152013	0.00134368
Jaml	junction adhesion molecule like	9.36849	7.02979	8.94657	4.14398	3.50742	4.38474	8.44828	4.01205	-4.43624	2.97e-20	4.05e-18
Wnt2	wingless-type MMTV integration site family, member 2	2.2078	4.69692	5.5243	5.03747	4.7817	5.12156	4.14301	4.98024	0.837235	0.655138	0.87912
Thada	thyroid adenoma associated	7.50768	8.11529	7.39781	7.8309	7.90423	7.9977	7.67359	7.91094	0.237348	0.414977	0.748955
Dync2li1	dynein cytoplasmic 2 light intermediate chain 1	5.3078	6.75126	6.20563	6.79352	6.64545	6.98079	6.08823	6.80659	0.718359	0.11124	0.308614
Slc25a46	solute carrier family 25, member 46	10.6425	10.3897	10.8092	10.4765	10.8538	10.7411	10.6138	10.6905	0.0766813	0.660748	0.879856
Polr2d	polymerase (RNA) II (DNA directed) polypeptide D	9.03853	8.7579	8.76153	8.28816	8.45201	8.52345	8.85265	8.42121	-0.431445	0.0120171	0.0536985
Gm22816	predicted gene, 22816	1.1418	0.99817	0	0	0	0	0.713325	0	-0.713325	0.610281	0.875654
Kbtbd2	kelch repeat and BTB (POZ) domain containing 2	9.82709	9.35609	9.75347	9.3593	9.3768	9.42877	9.64555	9.38829	-0.257261	0.109953	0.306023
Plg	plasminogen	1.7711	0	0	1.3313	0	0	0.590366	0.443766	-0.1466	0.875787	0.954577
2610301B20Rik	RIKEN cDNA 2610301B20 gene	6.9965	7.98504	8.07267	7.71074	7.29077	7.84383	7.68474	7.61511	-0.0696257	0.684546	0.895897
Gm11696	predicted gene 11696	6.04777	4.95065	5.9163	5.67349	5.19873	5.96945	5.63824	5.61389	-0.0243534	0.888407	0.961862
Lrrcc1	leucine rich repeat and coiled-coil domain containing 1	7.26898	7.86672	7.2422	8.02395	8.47087	8.27747	7.4593	8.25743	0.798133	0.00185896	0.0112517
Ano5	anoctamin 5	4.65142	4.08402	3.26627	5.30981	5.81552	6.49993	4.00057	5.87508	1.87452	0.000310034	0.002467
Slc2a9	solute carrier family 2 (facilitated glucose transporter), member 9	5.39312	6.75126	6.52364	6.03215	6.20172	6.05825	6.22267	6.09738	-0.125298	0.540449	0.844843
Eif2ak4	eukaryotic translation initiation factor 2 alpha kinase 4	9.81361	8.70025	9.34325	8.31589	8.44248	8.30948	9.28571	8.35595	-0.929756	0.000183005	0.00157759
Wdr1	WD repeat domain 1	13.0043	12.8081	12.7192	11.9732	12.0196	12.0808	12.8439	12.0246	-0.819305	3.8e-10	1.33e-08
Zfp458	zinc finger protein 458	5.06942	5.31836	4.69525	4.96928	5.81552	5.16219	5.02768	5.31566	0.287987	0.481406	0.807433
Soga1	suppressor of glucose, autophagy associated 1	9.18628	8.68983	9.21425	8.57587	8.86957	8.27284	9.03012	8.57276	-0.457357	0.0430176	0.14967
Gm6161	predicted gene 6161	6.79178	6.59629	6.53859	5.58511	5.72411	5.69264	6.64222	5.66729	-0.974932	0.000630007	0.00449808
Gm3880	predicted pseudogene 3880	1.7711	0	0	0	0	0	0.590366	0	-0.590366	0.589356	0.875654
Rpl23a-ps4	ribosomal protein L23A, pseudogene 4	0	0	3.4032	0	0	2.31557	1.1344	0.771856	-0.362543	0.602169	0.875654
Gm8129	predicted pseudogene 8129	6.45735	6.47211	6.58251	6.3328	6.10841	6.40153	6.50399	6.28091	-0.223075	0.423419	0.758446
Pcolce2	procollagen C-endopeptidase enhancer 2	8.12783	8.95345	9.08534	9.55521	9.72801	9.59754	8.7222	9.62692	0.904713	0.000506815	0.00373105
Cd48	CD48 antigen	5.54997	8.3539	6.06821	6.87964	6.24621	6.18198	6.65736	6.43594	-0.221418	0.231875	0.519594
Clpx	caseinolytic mitochondrial matrix peptidase chaperone subunit	11.2792	10.9263	10.9604	10.913	10.9661	11.1887	11.0553	11.0226	-0.0327116	0.816457	0.933154
Dxo	decapping exoribonuclease	8.66249	8.47613	8.19561	8.26346	7.97862	8.17695	8.44475	8.13968	-0.305069	0.121554	0.329448
Xaf1	XIAP associated factor 1	8.34681	8.88813	9.14025	9.01907	9.22115	8.98641	8.79173	9.07554	0.283813	0.266585	0.571514
Bptf	bromodomain PHD finger transcription factor	10.7434	10.299	10.7243	9.98459	10.2867	9.93016	10.5889	10.0671	-0.521765	0.00322908	0.0178581
Ltbp4	latent transforming growth factor beta binding protein 4	12.7479	12.42	13.2208	14.0779	13.8094	13.9656	12.7962	13.9509	1.15471	1.65e-07	3.24e-06
Sox30	SRY (sex determining region Y)-box 30	0	2.58191	2.27256	4.42424	3.77368	3.16286	1.61816	3.78693	2.16877	0.0222359	0.0881204
Usp42	ubiquitin specific peptidase 42	9.09373	8.38437	8.64553	8.25632	8.26469	8.10582	8.70788	8.20894	-0.498934	0.0178434	0.0739331
AC154141.1	---	5.3078	4.69692	5.79709	4.47431	6.03424	5.16219	5.26727	5.22358	-0.0436885	0.976419	0.98968
Gm45102	predicted gene 45102	1.1418	0	0	0	2.15619	0.996028	0.380602	1.05074	0.670137	0.467859	0.79716
Gm44609	predicted gene 44609	0	0.99817	0	0	0	0	0.332723	0	-0.332723	0.787905	0.927867
Gm14767	predicted gene 14767	2.2078	0	1.95377	0	0	1.99404	1.38719	0.664679	-0.72251	0.61257	0.875654
H3f3a-ps2	H3 histone, family 3A, pseudogene 2	6.39666	6.79079	6.62514	6.65928	6.46901	6.73359	6.60419	6.62063	0.0164335	0.966893	0.988172
B430219N15Rik	RIKEN cDNA B430219N15 gene	5.16954	3.58161	5.61169	3.33596	2.75751	2.80054	4.78761	2.96467	-1.82294	0.00212901	0.0126171
Gm13091	predicted gene 13091	4.58044	4.08402	3.74989	2.47219	3.18065	2.31557	4.13811	2.65614	-1.48198	0.0201218	0.0812515
Gm27299	predicted gene, 27299	1.1418	0	0	0.814054	1.72461	0	0.380602	0.846221	0.465619	0.626018	0.875654
BB218582	expressed sequence BB218582	5.99416	6.58134	5.77202	7.64121	7.99175	7.92872	6.11584	7.85389	1.73805	2.03e-09	6.06e-08
Gm27300	predicted gene, 27300	1.1418	0.99817	0.969343	0.814054	1.10598	0.996028	1.03644	0.972021	-0.0644183	0.94473	0.980249
Gm27301	predicted gene, 27301	0	0.99817	0	0	0	0	0.332723	0	-0.332723	0.787905	0.927867
Mir6931	microRNA 6931	2.2078	1.58252	0.969343	2.96778	2.98454	3.16286	1.58656	3.03839	1.45183	0.0922524	0.268396
---	---	0	1.58252	0	0	1.72461	0	0.527507	0.574869	0.047362	0.964714	0.988172
Sfn	stratifin	7.15146	8.85743	8.242	7.32382	6.83213	6.51569	8.08363	6.89055	-1.19308	0.00100193	0.0066739
Neurl4	neuralized E3 ubiquitin protein ligase 4	9.95886	10.4558	10.4299	11.0191	10.8156	10.8461	10.2815	10.8936	0.612097	0.000505765	0.00372513
---	---	1.1418	0	0.969343	1.3313	0	0	0.703716	0.443766	-0.25995	0.896544	0.966286
Gm20538	predicted gene 20538	0	0	0.969343	0	1.10598	0	0.323114	0.36866	0.0455461	0.973412	0.988172
Atp5sl	ATP5S-like	9.3526	9.59997	9.53987	10.5114	10.5276	10.5638	9.49748	10.5343	1.0368	2.3e-15	1.77e-13
Gm22240	predicted gene, 22240	1.1418	0	0.969343	0.814054	1.10598	0.996028	0.703716	0.972021	0.268305	0.844591	0.935994
Gm6578	predicted gene 6578	0	1.58252	0	0	0	0	0.527507	0	-0.527507	0.632842	0.875654
Gm8307	predicted gene 8307	1.7711	2.319	2.27256	0	0	1.99404	2.12089	0.664679	-1.45621	0.287266	0.600275
D5Ertd615e	DNA segment, Chr 5, ERATO Doi 615, expressed	0	1.99725	0	3.10122	3.77368	2.80054	0.665751	3.22515	2.55939	0.0207675	0.0833921
Zfp474	zinc finger protein 474	2.54257	4.80382	0	3.5378	0	0	2.4488	1.17927	-1.26953	0.623992	0.875654
Olfr374	olfactory receptor 374	0	0	1.95377	0	2.48795	0	0.651255	0.829317	0.178062	0.826312	0.933154
Fxyd6	FXYD domain-containing ion transport regulator 6	8.57847	9.31602	9.30006	9.58684	9.59459	9.73015	9.06485	9.63719	0.572344	0.0135254	0.0593789
Gm13902	predicted gene 13902	0	0	0	1.3313	0	0	0	0.443766	0.443766	0.717611	0.909308
Gm6451	predicted gene 6451	5.12035	5.58138	4.46433	4.56951	4.7817	4.8503	5.05535	4.73384	-0.321517	0.398445	0.732626
Gm12240	predicted gene 12240	1.7711	0	1.95377	0	0	0	1.24162	0	-1.24162	0.271721	0.578792
Gm21987	predicted gene 21987	4.90485	4.45594	5.1097	0	3.35327	3.6931	4.8235	2.34879	-2.47471	0.0200672	0.0810886
Entpd4	ectonucleoside triphosphate diphosphohydrolase 4	10.8595	10.5586	10.7558	11.2291	11.2318	11.3687	10.7246	11.2766	0.551932	4.89e-05	0.000504648
Gm36980	predicted gene, 36980	1.7711	0	0	0	0	0	0.590366	0	-0.590366	0.589356	0.875654
Gm8146	predicted gene 8146	0	0	0.969343	0	0	1.57966	0.323114	0.526555	0.20344	0.836417	0.933154
Gm36981	predicted gene, 36981	2.2078	1.58252	3.4032	3.10122	3.35327	3.79997	2.39784	3.41815	1.02031	0.278593	0.58848
AC153943.2	---	0	0	0	1.3313	0	0	0	0.443766	0.443766	0.717611	0.909308
AC153825.1	---	5.72472	6.3887	6.00505	6.03215	6.33126	6.4184	6.03949	6.2606	0.221115	0.54205	0.84672
AL589661.1	---	0	0.99817	1.95377	1.3313	1.10598	1.57966	0.983979	1.33898	0.355002	0.895716	0.966064
AC154864.1	---	1.1418	1.58252	0.969343	0	1.10598	0.996028	1.23122	0.70067	-0.530554	0.617175	0.875654
AC122210.1	---	1.7711	0	0	0	0	0	0.590366	0	-0.590366	0.589356	0.875654
AC153977.1	---	0	2.58191	2.75439	1.71125	2.75751	1.99404	1.77877	2.15426	0.375495	0.994121	0.997087
Gm9889	predicted gene 9889	7.28022	5.24436	6.77147	4.42424	4.36399	4.51595	6.43202	4.43473	-1.99729	1.48e-05	0.000177961
A630001G21Rik	RIKEN cDNA A630001G21 gene	7.16365	8.06244	6.39817	6.61534	6.31046	6.29593	7.20809	6.40724	-0.800846	0.0194665	0.0791752
Zfp212	Zinc finger protein 212	8.20654	8.00758	8.5381	8.35983	8.2374	8.39721	8.25074	8.33148	0.0807423	0.74556	0.92589
Cnksr2	connector enhancer of kinase suppressor of Ras 2	5.43396	2.319	3.64332	4.14398	4.44255	4.45184	3.79876	4.34612	0.547364	0.971995	0.988172
Mirlet7c-2	microRNA let7c-2	1.1418	0.99817	0.969343	0.814054	1.10598	0.996028	1.03644	0.972021	-0.0644183	0.94473	0.980249
Gm22245	predicted gene, 22245	0	0	0	0	1.10598	0	0	0.36866	0.36866	0.839626	0.933154
DQ267102	snoRNA DQ267102	0	0	0	0.814054	0	0	0	0.271351	0.271351	0.839626	0.933154
n-R5s215	nuclear encoded rRNA 5S 215	1.1418	0.99817	0.969343	0.814054	1.10598	0.996028	1.03644	0.972021	-0.0644183	0.94473	0.980249
Rrp7a	ribosomal RNA processing 7 homolog A (S. cerevisiae)	10.4469	10.6302	10.3033	9.90469	9.73778	9.88232	10.4601	9.8416	-0.618541	1.68e-05	0.000198801
Amigo1	adhesion molecule with Ig like domain 1	8.15251	8.51205	8.15255	9.42283	9.59028	9.60677	8.27237	9.53996	1.26759	2.76e-13	1.59e-11
Efcab5	EF-hand calcium binding domain 5	5.58665	4.64034	3.26627	4.14398	4.58791	4.38474	4.49775	4.37221	-0.125543	0.525292	0.841417
Zfp438	zinc finger protein 438	7.49808	6.75126	6.44651	7.1499	7.47025	7.3758	6.89862	7.33198	0.433366	0.236457	0.526519
Gm37144	predicted gene, 37144	3.2397	3.31863	2.94591	3.9453	3.77368	4.07998	3.16808	3.93299	0.764903	0.19391	0.458704
Sim2	single-minded homolog 2 (Drosophila)	0	0	0	2.26024	0	0	0	0.753414	0.753414	0.491422	0.813059
Gm43119	predicted gene 43119	2.2078	1.58252	0	1.3313	0	0	1.26344	0.443766	-0.819675	0.472617	0.799418
Mir6962	microRNA 6962	0	0	0	0	0	0.996028	0	0.332009	0.332009	0.839626	0.933154
Gm43582	predicted gene 43582	2.2078	1.99725	2.94591	2.0117	0	1.57966	2.38366	1.19712	-1.18653	0.305415	0.625084
2010309G21Rik	RIKEN cDNA 2010309G21 gene	0	0	0	1.71125	0	0	0	0.570415	0.570415	0.616793	0.875654
Cbx7	chromobox 7	9.26195	9.09438	9.95628	9.96612	9.95937	10.2185	9.43753	10.048	0.610452	0.0162579	0.0687933
Galt	galactose-1-phosphate uridyl transferase	9.62809	9.8213	9.96322	10.2402	10.292	10.4658	9.8042	10.3326	0.528439	0.000466073	0.00348016
Ncan	neurocan	0	3.69706	1.54394	2.0117	0	1.57966	1.747	1.19712	-0.549878	0.387629	0.722668
Hunk	hormonally upregulated Neu-associated kinase	4.65142	5.35398	5.36576	5.25358	5.69231	4.57734	5.12372	5.17441	0.0506917	0.870886	0.951631
Borcs8	BLOC-1 related complex subunit 8	8.14638	8.17128	7.82703	8.45952	8.2429	8.76685	8.04823	8.48976	0.441528	0.0343151	0.124693
Gm17168	predicted gene 17168	0	2.80422	2.75439	3.33596	3.50742	3.31477	1.85287	3.38605	1.53318	0.200678	0.469448
5330438I03Rik	RIKEN cDNA 5330438I03 gene	1.1418	1.99725	0.969343	0	0	0.996028	1.36947	0.332009	-1.03746	0.306007	0.625789
Usmg5	upregulated during skeletal muscle growth 5	12.597	12.2143	12.4962	12.6501	12.9512	12.9083	12.4358	12.8365	0.400694	0.01321	0.0582305
Mta3	metastasis associated 3	8.50371	9.01594	8.9798	8.75617	8.95246	9.01165	8.83315	8.90676	0.073611	0.771189	0.927867
Rps16-ps2	ribosomal protein S16, pseudogene 2	9.38941	9.90022	9.65748	9.34759	8.93218	9.38866	9.64904	9.22281	-0.426227	0.0323604	0.119215
A230083G16Rik	RIKEN cDNA A230083G16 gene	3.83514	3.4561	3.84913	4.08075	4.51706	3.31477	3.71346	3.97086	0.257402	0.580127	0.875654
Gm44067	predicted gene, 44067	2.54257	2.319	0	3.10122	2.75751	0	1.62052	1.95291	0.332384	0.683926	0.895616
2210412B16Rik	RIKEN cDNA 2210412B16 gene	3.2397	1.58252	2.5335	2.0117	3.18065	2.99304	2.45191	2.72847	0.276558	0.802376	0.933154
AC145736.2	---	0	0	0	0	0	1.99404	0	0.664679	0.664679	0.554011	0.853566
4933407E24Rik	RIKEN cDNA 4933407E24 gene	0	0	0	0	0	2.80054	0	0.933513	0.933513	0.34592	0.676764
Gm6652	predicted gene 6652	7.13916	6.20584	6.56802	7.11876	7.11001	7.67156	6.63767	7.30011	0.662436	0.0468263	0.160163
Gm9772	predicted gene 9772	1.7711	0	0	0	0	0	0.590366	0	-0.590366	0.589356	0.875654
Flcn	folliculin	10.6349	10.8045	11.5619	10.9649	10.7144	11.0635	11.0004	10.9142	-0.0861875	0.569099	0.866498
---	---	0	1.58252	0	0	0	0	0.527507	0	-0.527507	0.632842	0.875654
CT485612.7	---	0	1.58252	0	0	0	0	0.527507	0	-0.527507	0.632842	0.875654
AC125409.3	---	0	1.58252	0	0	1.10598	1.57966	0.527507	0.895215	0.367708	0.823857	0.933154
AC162801.3	---	1.1418	1.99725	0	0.814054	1.72461	1.57966	1.04635	1.37278	0.326422	0.890605	0.963415
Inhbb	inhibin beta-B	11.468	8.95924	9.20022	7.34416	6.90331	7.07957	9.87583	7.10901	-2.76681	5.2e-05	0.000531018
Pax1	paired box 1	3.56793	4.90335	3.4032	2.26024	2.75751	0	3.95816	1.67258	-2.28557	0.0140725	0.0612658
AC154635.1	---	2.2078	0	0	0	0	0	0.735934	0	-0.735934	0.48784	0.81057
Clca3b	chloride channel accessory 3B	2.54257	5.77776	0	4.42424	0	0	2.77345	1.47475	-1.2987	0.670627	0.885788
Apbb1	amyloid beta (A4) precursor protein-binding, family B, member 1	9.97452	9.96501	9.95489	10.9221	10.8797	11.2142	9.96481	11.0053	1.04053	1.46e-13	8.71e-12
Ubtf	upstream binding transcription factor, RNA polymerase I	11.6426	11.3784	11.5426	11.249	11.4549	11.274	11.5212	11.326	-0.19522	0.146644	0.376468
Lsm12	LSM12 homolog	10.17	9.68634	9.29347	9.22135	9.53757	9.31624	9.71661	9.35838	-0.358221	0.0871038	0.257571
Tmem101	transmembrane protein 101	6.86827	7.82924	7.53081	8.32273	7.96538	8.50382	7.40944	8.26398	0.854536	0.0038064	0.0205154
Kif1a	kinesin family member 1A	6.82287	6.81655	6.59686	6.77366	6.72619	6.81229	6.74543	6.77072	0.0252911	0.921359	0.979583
Adam11	a disintegrin and metallopeptidase domain 11	9.3816	8.26781	8.70635	9.07895	8.82261	8.98641	8.78525	8.96266	0.177403	0.685551	0.89668
Ccdc43	coiled-coil domain containing 43	9.10326	8.86671	8.95216	8.91868	9.06228	8.9722	8.97404	8.98439	0.0103413	0.956588	0.985066
Slc25a11	solute carrier family 25 (mitochondrial carrier oxoglutarate carrier), member 11	12.7341	12.4382	12.6566	13.4534	13.4735	13.6893	12.6096	13.5388	0.929105	1.77e-10	6.56e-09
Chrne	cholinergic receptor, nicotinic, epsilon polypeptide	0	0	0	0	1.72461	0	0	0.574869	0.574869	0.625351	0.875654
Eftud2	elongation factor Tu GTP binding domain containing 2	10.8529	10.8706	10.7227	10.5084	10.4619	10.3758	10.8154	10.4487	-0.366671	0.00222817	0.013092
Higd1b	HIG1 domain family, member 1B	6.83816	7.46396	7.26933	8.20905	7.78114	7.89295	7.19049	7.96105	0.770559	0.00221974	0.0130552
Gm28437	predicted gene 28437	19.2856	18.6784	18.9372	19.4012	19.6931	19.7266	18.9671	19.607	0.639937	0.00425663	0.0225885
Adamts9	a disintegrin-like and metallopeptidase (reprolysin type) with thrombospondin type 1 motif, 9	11.7791	10.367	10.2901	9.37915	9.49442	8.78972	10.8121	9.2211	-1.59099	0.00112689	0.00737969
Prickle2	prickle planar cell polarity protein 2	8.61888	7.99635	8.33909	7.72631	8.27546	7.83757	8.31811	7.94645	-0.371658	0.12381	0.33362
A930002H24Rik	RIKEN cDNA A930002H24 gene	3.41313	1.99725	3.11496	2.47219	2.48795	3.16286	2.84178	2.70767	-0.134115	0.787346	0.927867
Gm43142	predicted gene 43142	0	0	0	0	1.10598	0	0	0.36866	0.36866	0.839626	0.933154
Lrig1	leucine-rich repeats and immunoglobulin-like domains 1	9.9797	9.5662	9.85695	9.84766	9.69228	9.80263	9.80095	9.78086	-0.0200917	0.862054	0.946932
Gm43022	predicted gene 43022	0	0	1.54394	0	2.48795	0	0.514647	0.829317	0.314671	0.686688	0.897061
Yy2	Yy2 transcription factor	4.78369	1.58252	4.26311	6.26331	5.65979	3.31477	3.54311	5.07929	1.53618	0.0754136	0.231076
Gm44968	predicted gene 44968	0	0	0.969343	0	0	1.57966	0.323114	0.526555	0.20344	0.836417	0.933154
Bbs5	Bardet-Biedl syndrome 5 (human)	5.72472	6.6688	6.74594	6.412	6.74181	6.65034	6.37982	6.60138	0.221565	0.656856	0.87912
Gm9165	predicted gene 9165	0	0	0	1.3313	0	0	0	0.443766	0.443766	0.717611	0.909308
Kcnma1	potassium large conductance calcium-activated channel, subfamily M, alpha member 1	5.16954	4.64034	5.43128	4.56951	4.36399	2.80054	5.08039	3.91135	-1.16904	0.072376	0.223754
Prmt1	protein arginine N-methyltransferase 1	11.3741	11.5086	11.4596	10.6472	10.5015	10.7444	11.4474	10.631	-0.816402	1.09e-10	4.22e-09
Pirt	phosphoinositide-interacting regulator of transient receptor potential channels	9.18926	9.23236	8.43804	9.02328	9.06228	8.9228	8.95322	9.00279	0.0495645	0.969989	0.988172
Gm17271	predicted gene, 17271	0	0	0	0.814054	0	0	0	0.271351	0.271351	0.839626	0.933154
Arf1	ADP-ribosylation factor 1	13.2977	13.0021	13.2412	12.7169	12.6143	12.817	13.1804	12.7161	-0.464284	0.000876254	0.00595189
Znfx1	zinc finger, NFX1-type containing 1	10.678	10.6758	10.6574	10.6862	10.7379	10.354	10.6704	10.5927	-0.0777103	0.641594	0.875654
Tenm4	teneurin transmembrane protein 4	4.42705	6.43932	5.55402	6.11339	5.19873	5.31417	5.47346	5.5421	0.0686328	0.866451	0.9487
Nup133	nucleoporin 133	9.07771	9.02977	9.05188	8.9544	8.97245	9.2518	9.05312	9.05955	0.00643065	0.935703	0.980249
Fam26d	family with sequence similarity 26, member D	0	0	1.54394	0	0	0	0.514647	0	-0.514647	0.642125	0.875654
Gm37917	predicted gene, 37917	0	0	0	0	1.10598	0	0	0.36866	0.36866	0.839626	0.933154
---	---	0	1.58252	0	0	0	1.99404	0.527507	0.664679	0.137172	0.862946	0.947018
---	---	0	0	0	0.814054	0	0	0	0.271351	0.271351	0.839626	0.933154
---	---	8.28118	9.4741	11.3298	10.8379	11.1294	10.4162	9.69504	10.7945	1.09949	0.482031	0.808212
Rnu3b4	U3B small nuclear RNA 4	0	0	0.969343	0	0	2.31557	0.323114	0.771856	0.448742	0.578534	0.874495
Gm43203	predicted gene 43203	2.54257	2.319	4.0292	0	0	0	2.96359	0	-2.96359	0.000996608	0.00664281
Gm43507	predicted gene 43507	0	0	0	0.814054	1.72461	1.57966	0	1.37278	1.37278	0.235761	0.525356
2510017J16Rik	RIKEN cDNA 2510017J16 gene	3.2397	3.31863	2.5335	2.96778	4.36399	3.6931	3.03061	3.67496	0.644344	0.302769	0.621011
CT025619.3	---	0	0	0	0	0	0.996028	0	0.332009	0.332009	0.839626	0.933154
AC151843.2	---	1.7711	0.99817	1.54394	1.3313	1.10598	1.99404	1.43774	1.47711	0.0393695	0.946962	0.981698
AC165442.1	---	0	0	0	1.3313	0	1.57966	0	0.970321	0.970321	0.461755	0.792048
Speer4c	spermatogenesis associated glutamate (E)-rich protein 4C	0	2.58191	0	0	0	0	0.860637	0	-0.860637	0.391767	0.724651
Klf14	Kruppel-like factor 14	2.2078	0	0	1.71125	0	0	0.735934	0.570415	-0.165519	0.847679	0.937372
Aoah	acyloxyacyl hydrolase	6.19759	7.26315	6.18678	6.34631	6.10841	6.12144	6.54917	6.19205	-0.35712	0.233462	0.521729
Gm36987	predicted gene, 36987	1.1418	0.99817	0	0	0	0.996028	0.713325	0.332009	-0.381316	0.737389	0.921614
Gm8010	predicted gene 8010	0	0	0	2.26024	0	0	0	0.753414	0.753414	0.491422	0.813059
Trim27	tripartite motif-containing 27	9.45536	9.09963	8.84203	8.7229	8.59646	8.55431	9.13234	8.62456	-0.507786	0.00832996	0.0396615
Zkscan3	zinc finger with KRAB and SCAN domains 3	9.96236	10.2155	9.69632	10.5521	10.7252	10.3386	9.95806	10.5386	0.580547	0.0016499	0.0101882
Gm36989	predicted gene, 36989	5.06942	1.58252	3.64332	2.26024	3.18065	3.4522	3.43175	2.96437	-0.467388	0.256019	0.555861
Pak2	p21 protein (Cdc42/Rac)-activated kinase 2	11.4351	10.8434	10.751	10.1106	10.2503	10.0144	11.0098	10.1251	-0.884724	6.57e-06	8.68e-05
Meltf	melanotransferrin	2.81411	2.319	2.27256	3.9453	2.48795	0	2.46856	2.14442	-0.324137	0.687918	0.898033
Spag6l	sperm associated antigen 6-like	0	5.61112	0	5.58511	1.72461	0	1.87037	2.43657	0.566199	0.99067	0.997087
Slc6a14	solute carrier family 6 (neurotransmitter transporter), member 14	2.2078	5.35398	3.84913	4.01461	0	2.31557	3.80364	2.11006	-1.69358	0.173264	0.423377
Wdr53	WD repeat domain 53	7.16365	7.48017	7.43022	7.58536	7.36324	7.66451	7.35802	7.5377	0.179686	0.41426	0.748688
Dnm1l	dynamin 1-like	11.5032	11.4517	11.6561	11.4806	11.8832	11.7259	11.537	11.6966	0.159585	0.273265	0.580699
Fgd4	FYVE, RhoGEF and PH domain containing 4	7.36714	8.54709	7.83915	8.91642	9.23777	9.07154	7.91779	9.07524	1.15745	0.000157275	0.00138334
Hes7	hairy and enhancer of split 7 (Drosophila)	2.81411	2.58191	2.94591	3.22336	2.48795	2.99304	2.78064	2.90145	0.120806	0.825593	0.933154
Rabepk	Rab9 effector protein with kelch motifs	8.29787	8.21067	8.23743	8.38949	8.1168	8.3185	8.24866	8.27493	0.0262746	0.846096	0.937231
Srrm1	serine/arginine repetitive matrix 1	12.228	11.8877	12.1827	12.0425	12.3125	12.0762	12.0995	12.1438	0.0442909	0.787045	0.927867
Hdac1	histone deacetylase 1	9.64558	10.0825	9.81767	9.39548	9.47819	9.37792	9.84858	9.4172	-0.431378	0.00599317	0.0301509
Stpg1	sperm tail PG rich repeat containing 1	0	1.58252	0	3.87249	2.75751	2.99304	0.527507	3.20768	2.68017	0.010447	0.0477819
Nipal3	NIPA-like domain containing 3	5.88057	8.55477	8.41393	9.68445	9.85373	9.84848	7.61642	9.79555	2.17913	0.0137495	0.0601537
Csmd2	CUB and Sushi multiple domains 2	2.54257	1.99725	1.95377	0.814054	2.15619	1.57966	2.16453	1.51664	-0.647896	0.511903	0.833845
Zbtb8a	zinc finger and BTB domain containing 8a	5.39312	7.22518	6.52364	7.45428	7.08573	7.592	6.38065	7.37734	0.996691	0.0451656	0.155642
AC126554.9	---	0	0	0	0	1.10598	0	0	0.36866	0.36866	0.839626	0.933154
AC148334.2	---	3.2397	3.99657	3.11496	0	2.48795	1.57966	3.45041	1.35587	-2.09454	0.0332346	0.121594
AC133498.1	---	6.64297	6.75126	5.66713	6.64842	6.7104	6.88693	6.35379	6.74858	0.394796	0.341663	0.671558
CT010456.4	---	0	0	0	1.71125	2.15619	1.57966	0	1.8157	1.8157	0.0905985	0.264953
AC134328.1	---	0	1.99725	1.54394	1.3313	1.72461	0.996028	1.1804	1.35064	0.170247	0.967391	0.988172
AC055772.2	---	1.1418	1.58252	2.94591	2.0117	1.72461	0	1.89008	1.24544	-0.644644	0.552842	0.853566
Parvg	parvin, gamma	6.79178	8.12563	7.82093	5.51509	4.95251	5.72012	7.57945	5.3959	-2.18355	7.6e-09	2e-07
Parvb	parvin, beta	11.6604	11.2413	11.5486	11.4787	11.4478	11.5595	11.4835	11.4953	0.0118992	0.98768	0.995234
Gm15131	predicted gene 15131	0	2.319	0	0	0	0	0.773	0	-0.773	0.461623	0.792048
Csnk1e	casein kinase 1, epsilon	11.3389	10.5652	11.3442	10.8302	10.8276	10.7644	11.0828	10.8074	-0.275441	0.134727	0.354311
Smc1b	structural maintenance of chromosomes 1B	0	0	0	2.96778	1.72461	0	0	1.56413	1.56413	0.11583	0.317798
Ribc2	RIB43A domain with coiled-coils 2	0	2.9968	0	2.0117	2.15619	0	0.998932	1.3893	0.390365	0.954856	0.984085
Samm50	SAMM50 sorting and assembly machinery component	12.3833	11.9935	12.2945	12.6807	12.6641	12.8993	12.2238	12.7481	0.52429	0.00090484	0.0061142
Sh3bp1	SH3-domain binding protein 1	7.56396	8.79401	8.13791	8.02815	7.88326	7.97507	8.16529	7.96216	-0.203133	0.332292	0.659389
Fam118a	family with sequence similarity 118, member A	8.4147	8.11529	8.38941	7.92841	7.90423	7.91094	8.30647	7.91453	-0.391941	0.0281704	0.10695
Gm42441	predicted gene 42441	0	0	0	0	0	1.57966	0	0.526555	0.526555	0.659841	0.87912
Hspb6	heat shock protein, alpha-crystallin-related, B6	14.0837	13.5985	13.9723	14.1556	14.493	14.4277	13.8848	14.3587	0.473925	0.00988309	0.0456296
Dpm3	dolichyl-phosphate mannosyltransferase polypeptide 3	6.91229	7.56621	6.83337	7.42912	6.74181	7.40148	7.10396	7.1908	0.0868458	0.789096	0.928668
Wnt4	wingless-type MMTV integration site family, member 4	5.93848	6.97365	6.55338	6.17524	4.51706	4.16241	6.4885	4.95157	-1.53693	0.0175438	0.072981
Mrpl41	mitochondrial ribosomal protein L41	9.25911	9.59811	9.39959	10.0562	10.0562	10.1303	9.41894	10.0809	0.661987	6.23e-06	8.29e-05
St8sia2	ST8 alpha-N-acetyl-neuraminide alpha-2,8-sialyltransferase 2	2.54257	3.80395	3.52825	4.96928	4.84091	3.57767	3.29159	4.46262	1.17103	0.0593354	0.19186
Mcoln3	mucolipin 3	0	0	0	2.0117	0	1.57966	0	1.19712	1.19712	0.3069	0.626853
Clec3b	C-type lectin domain family 3, member b	7.33516	9.61289	8.8116	10.8769	10.6361	10.7411	8.58655	10.7513	2.16479	0.00189054	0.0114137
Exosc7	exosome component 7	7.82418	8.41841	8.06753	8.65669	8.73167	8.68555	8.10338	8.6913	0.587928	0.00504527	0.0260526
Zdhhc3	zinc finger, DHHC domain containing 3	10.945	10.6563	10.8842	10.3065	10.522	10.5341	10.8285	10.4542	-0.374326	0.00886243	0.0417248
Tgm4	transglutaminase 4 (prostate)	2.81411	3.80395	4.40033	4.61486	4.19273	3.31477	3.6728	4.04079	0.367989	0.619835	0.875654
Ptcra	pre T cell antigen receptor alpha	0	1.99725	0	0	0	0	0.665751	0	-0.665751	0.529599	0.841417
Atp5c1	ATP synthase, H+ transporting, mitochondrial F1 complex, gamma polypeptide 1	14.4647	13.9844	14.2428	14.6536	14.7754	14.902	14.2306	14.777	0.546374	0.00177715	0.0108262
Ttll5	tubulin tyrosine ligase-like family, member 5	7.32433	8.01872	7.82703	8.19792	8.39881	8.29128	7.72336	8.296	0.572643	0.017154	0.0717635
4930412O13Rik	RIKEN cDNA 4930412O13 gene	0	1.58252	2.27256	1.3313	0	0	1.28503	0.443766	-0.841261	0.443105	0.778078
Suox	sulfite oxidase	7.83947	8.29097	8.06753	9.04208	9.14976	9.21365	8.06599	9.13516	1.06917	4.51e-09	1.24e-07
Slc12a8	solute carrier family 12 (potassium/chloride transporters), member 8	5.26317	5.48827	5.18761	5.03747	5.05609	5.27765	5.31302	5.12374	-0.18928	0.609306	0.875654
Cox18	cytochrome c oxidase assembly protein 18	7.76139	7.8851	8.03628	7.50334	7.78867	7.85627	7.89426	7.71609	-0.178165	0.382447	0.717244
Reep6	receptor accessory protein 6	6.64297	6.58134	5.02734	7.32382	6.91713	6.81229	6.08388	7.01775	0.933866	0.0588656	0.190783
Prr11	proline rich 11	4.42705	6.62573	5.29712	4.96928	4.36399	5.03668	5.44996	4.78998	-0.659982	0.113965	0.313817
Ska2	spindle and kinetochore associated complex subunit 2	7.49808	8.34508	8.1574	8.53223	8.79667	8.87471	8.00019	8.73453	0.734347	0.00481166	0.025004
Fbxl21	F-box and leucine-rich repeat protein 21	2.54257	4.80382	3.84913	2.82072	2.15619	3.16286	3.73184	2.71326	-1.01859	0.101212	0.28783
Rnf187	ring finger protein 187	10.9001	11.0249	10.9074	11.6914	11.4208	11.6534	10.9442	11.5885	0.644362	9.21e-07	1.52e-05
Smg8	smg-8 homolog, nonsense mediated mRNA decay factor (C. elegans)	9.07771	8.26781	8.69639	8.12143	8.28082	7.97507	8.68064	8.12577	-0.554865	0.0142229	0.0618052
4933440N22Rik	RIKEN cDNA 4933440N22 gene	5.90982	5.551	6.22423	6.21994	5.4476	4.57734	5.89502	5.41496	-0.480057	0.459914	0.792048
Ccp110	centriolar coiled coil protein 110	7.78526	8.12047	8.23284	7.21023	7.32227	7.24003	8.04619	7.25751	-0.788681	0.000149731	0.00132544
Zdhhc15	zinc finger, DHHC domain containing 15	3.83514	5.20589	5.49396	5.36393	5.32853	5.07974	4.845	5.2574	0.412404	0.612408	0.875654
Map9	microtubule-associated protein 9	4.96182	5.551	5.36576	5.13408	5.19873	5.12156	5.29286	5.15145	-0.141405	0.663345	0.881889
Ptgr1	prostaglandin reductase 1	5.43396	7.00759	6.31382	6.9609	6.87526	6.60684	6.25179	6.81433	0.562541	0.278005	0.587648
Mapkbp1	mitogen-activated protein kinase binding protein 1	9.59695	9.17127	9.85396	9.13838	9.08388	8.87776	9.54073	9.03334	-0.507388	0.0100256	0.0462174
Usp36	ubiquitin specific peptidase 36	10.8585	9.87439	10.1536	9.87238	9.82652	9.78647	10.2955	9.82846	-0.467053	0.0286376	0.10833
Astn2	astrotactin 2	4.78369	5.61112	4.0292	5.75676	5.40899	5.38455	4.80801	5.51677	0.708762	0.231025	0.518578
Pappa	pregnancy-associated plasma protein A	7.99767	5.16636	7.34778	4.08075	4.09882	3.79997	6.83727	3.99318	-2.84409	4.3e-08	9.54e-07
9430002A10Rik	RIKEN cDNA 9430002A10 gene	3.70771	2.9968	2.94591	3.9453	2.98454	3.31477	3.21681	3.41487	0.198063	0.718328	0.909479
Fam120c	family with sequence similarity 120, member C	6.47702	6.65459	6.79655	6.74336	7.30134	7.07957	6.64272	7.04142	0.398705	0.134195	0.353462
Rab1a	RAB1A, member RAS oncogene family	12.2758	12.3092	12.2698	11.9956	12.0873	12.109	12.2849	12.064	-0.220938	0.0416386	0.145911
---	---	0	0	0	0	0	0.996028	0	0.332009	0.332009	0.839626	0.933154
---	---	2.54257	2.9968	0.969343	3.33596	3.99836	2.31557	2.16957	3.21663	1.04706	0.246868	0.542407
---	---	0	0	0	0	1.10598	1.99404	0	1.03334	1.03334	0.403344	0.737982
---	---	3.04254	0	1.54394	1.71125	0	0	1.52883	0.570415	-0.958412	0.375577	0.709985
Lgr5	leucine rich repeat containing G protein coupled receptor 5	0	2.9968	2.75439	3.4404	1.72461	2.31557	1.91706	2.49353	0.576464	0.774064	0.927867
Dock2	dedicator of cyto-kinesis 2	8.35215	9.56049	8.53437	7.63572	7.56109	7.28672	8.81567	7.49451	-1.32116	8.95e-06	0.000113828
---	---	1.7711	0	0	0	0	0	0.590366	0	-0.590366	0.589356	0.875654
Elp5	elongator acetyltransferase complex subunit 5	9.51843	9.73949	9.78044	9.6481	9.77051	9.86242	9.67945	9.76034	0.0808889	0.596673	0.875654
Slc2a4	solute carrier family 2 (facilitated glucose transporter), member 4	11.3602	11.7251	12.5543	13.2315	13.2427	13.4589	11.8799	13.3111	1.43115	8.63e-07	1.43e-05
Gabarap	gamma-aminobutyric acid receptor associated protein	12.3366	12.4068	12.2583	12.2384	12.3433	12.4041	12.3339	12.3286	-0.00531554	0.96584	0.988172
Igkv1-117	immunoglobulin kappa variable 1-117	3.83514	5.16636	4.11146	8.2201	4.51706	6.07963	4.37099	6.27226	1.90127	0.000663817	0.0047018
Cldn7	claudin 7	4.34377	6.3887	2.27256	4.74292	1.72461	1.57966	4.33501	2.6824	-1.65261	0.104515	0.294898
Gm14547	predicted gene 14547	0	0.99817	0	0	0	0.996028	0.332723	0.332009	-0.000714	0.973412	0.988172
Gm13748	predicted gene 13748	3.04254	1.99725	2.94591	0	0	1.57966	2.6619	0.526555	-2.13535	0.0480176	0.163352
Rreb1	ras responsive element binding protein 1	10.293	10.0435	9.96875	10.1429	10.2827	10.1367	10.1018	10.1874	0.0856854	0.576598	0.87279
Ccdc171	coiled-coil domain containing 171	3.2397	5.64027	3.64332	4.5227	5.48521	4.24039	4.17443	4.74943	0.575001	0.711491	0.909308
Rexo4	REX4, 3-5 exonuclease	9.33114	9.05434	8.52315	8.96975	8.80784	8.78323	8.96954	8.85361	-0.115937	0.508226	0.829952
Slc16a13	solute carrier family 16 (monocarboxylic acid transporters), member 13	7.32433	6.81655	6.8212	7.11087	6.80265	7.18192	6.98736	7.03181	0.0444526	0.881339	0.957762
Cxxc4	CXXC finger 4	7.99767	6.22521	6.55338	6.88889	7.11001	6.43508	6.92542	6.81133	-0.114089	0.502974	0.823751
L3mbtl3	l(3)mbt-like 3 (Drosophila)	7.84705	8.11009	8.33053	8.04481	8.17549	8.1006	8.09589	8.10697	0.011078	0.980104	0.991591
Gm11973	predicted gene 11973	2.2078	2.319	0	2.65696	0	1.57966	1.50893	1.41221	-0.0967265	0.996523	0.998269
Ccdc89	coiled-coil domain containing 89	0	3.58161	2.75439	3.9453	3.89039	2.57834	2.112	3.47134	1.35934	0.339602	0.668632
BC024139	cDNA sequence BC024139	0	2.319	3.64332	0	1.72461	0	1.98744	0.574869	-1.41257	0.138953	0.362156
Wipf3	WAS/WASL interacting protein family, member 3	9.07126	9.1282	9.56198	10.2293	10.3325	10.3319	9.25381	10.2979	1.04409	2.47e-09	7.15e-08
Ush2a	usherin	0	0	1.54394	0	0	0	0.514647	0	-0.514647	0.642125	0.875654
Gm9801	predicted gene 9801	0	0	0	1.3313	1.72461	0	0	1.01864	1.01864	0.428774	0.762656
Lonrf2	LON peptidase N-terminal domain and ring finger 2	5.51232	6.01876	5.63968	7.56239	7.49811	7.48394	5.72359	7.51482	1.79123	1.31e-11	5.76e-10
Gm2451	predicted pseudogene 2451	5.06942	4.52006	5.39889	5.30981	5.40899	5.4185	4.99612	5.3791	0.382977	0.407677	0.741872
Gm26920	predicted gene, 26920	5.78909	0	3.94197	0	5.90147	6.18198	3.24369	4.02782	0.784128	0.719629	0.909849
Znrf2	zinc and ring finger 2	9.79021	9.69331	9.77572	9.2998	9.41384	9.4617	9.75308	9.39178	-0.361299	0.00597749	0.030097
Map2k5	mitogen-activated protein kinase kinase 5	8.64521	8.63297	8.83902	8.9566	8.77026	9.09535	8.70573	8.94073	0.235002	0.156247	0.394274
Rpl10-ps3	ribosomal protein L10, pseudogene 3	9.5536	9.65455	9.57291	9.0688	8.92877	9.12649	9.59369	9.04135	-0.552337	7.22e-05	0.000707323
Panx2	pannexin 2	4.90485	5.16636	5.1097	6.29151	5.90147	6.18198	5.06031	6.12499	1.06468	0.00184691	0.0111815
Nrf1	nuclear respiratory factor 1	9.64775	8.8037	9.16454	8.89819	8.68799	8.83755	9.20533	8.80791	-0.397418	0.0589999	0.191143
Gm9574	predicted gene 9574	3.83514	2.319	2.5335	4.37238	4.09882	3.99254	2.89588	4.15458	1.2587	0.0818921	0.245733
Rhog	ras homolog family member G	9.65424	10.2852	9.46949	9.18798	8.70003	8.98075	9.80298	8.95625	-0.846726	0.000303415	0.00242388
Lars	leucyl-tRNA synthetase	10.4667	10.5091	10.312	10.1449	10.2693	10.4546	10.4293	10.2896	-0.139704	0.33783	0.666495
Rbm27	RNA binding motif protein 27	10.1067	9.31376	9.76464	8.87974	9.2865	8.85934	9.72836	9.00853	-0.719835	0.00136272	0.00864887
Ttpa	tocopherol (alpha) transfer protein	6.51558	4.45594	4.52562	4.93393	4.71995	4.69279	5.16571	4.78222	-0.383489	0.241002	0.533154
C230071H17Rik	RIKEN cDNA C230071H17 gene	0	0	0	0	1.10598	1.99404	0	1.03334	1.03334	0.403344	0.737982
Tcerg1	transcription elongation regulator 1 (CA150)	11.3159	10.2021	10.7235	9.59817	9.69228	9.58825	10.7472	9.62623	-1.12094	2.28e-06	3.43e-05
---	---	0	0	0	0	0	0.996028	0	0.332009	0.332009	0.839626	0.933154
Rpp38	ribonuclease P/MRP 38 subunit	7.40871	6.62573	5.79709	6.249	6.67829	6.18198	6.61051	6.36976	-0.240754	0.378322	0.712412
Nfatc1	nuclear factor of activated T cells, cytoplasmic, calcineurin dependent 1	9.27043	9.46802	9.55097	9.53618	9.74555	9.55621	9.42981	9.61264	0.182839	0.235501	0.524992
Trim33	tripartite motif-containing 33	9.28724	9.07583	9.28463	8.66749	9.00841	8.6925	9.2159	8.78947	-0.426432	0.0129774	0.057397
Efnb3	ephrin B3	8.7938	8.99916	8.38528	11.0775	11.0564	11.111	8.72608	11.0816	2.35552	3.59e-40	2.53e-37
Scube2	signal peptide, CUB domain, EGF-like 2	6.4374	6.3887	6.26074	7.97697	8.22634	8.20639	6.36228	8.13657	1.77429	2.68e-16	2.27e-14
Slc27a4	solute carrier family 27 (fatty acid transporter), member 4	9.46031	9.59067	9.17653	9.47755	9.3155	9.50578	9.40917	9.43294	0.0237746	0.917635	0.977267
Cnga2	cyclic nucleotide gated channel alpha 2	0	0	4.0292	0	1.72461	2.31557	1.34307	1.34673	0.00365762	0.503015	0.823751
Gm43838	predicted gene 43838	0	1.58252	0	0	0	0	0.527507	0	-0.527507	0.632842	0.875654
Mir5623	microRNA 5623	0	0	0	0.814054	0	0	0	0.271351	0.271351	0.839626	0.933154
Gm43063	predicted gene 43063	0	0	2.27256	0	0	0	0.75752	0	-0.75752	0.470221	0.797323
Ctcf	CCCTC-binding factor	10.2465	10.3583	10.2846	10.2581	10.3869	10.2728	10.2965	10.306	0.00950927	0.939751	0.980249
Pard6a	par-6 family cell polarity regulator alpha	5.54997	6.61109	6.02641	6.78362	6.33126	6.95789	6.06249	6.69093	0.628438	0.10412	0.293919
Sh2d1a	SH2 domain containing 1A	0	1.58252	0	2.0117	2.48795	0	0.527507	1.49988	0.972377	0.388827	0.723834
G630016G05Rik	RIKEN cDNA G630016G05 gene	1.7711	1.99725	3.52825	3.62903	3.89039	3.4522	2.4322	3.65721	1.22501	0.183532	0.440665
Nfkbie	nuclear factor of kappa light polypeptide gene enhancer in B cells inhibitor, epsilon	7.73712	8.14101	7.22383	6.62645	6.37198	6.65034	7.70065	6.54959	-1.15106	4.93e-05	0.000507976
Arhgef18	rho/rac guanine nucleotide exchange factor (GEF) 18	9.80001	9.46395	9.06742	9.54646	9.66387	9.35838	9.44379	9.5229	0.0791103	0.794135	0.931875
Pnpla6	patatin-like phospholipase domain containing 6	8.73373	9.00757	9.19079	9.04208	9.12019	8.9636	8.97737	9.04196	0.0645918	0.765727	0.927867
Mcoln1	mucolipin 1	9.43539	9.59997	9.93385	9.84885	9.68017	9.79941	9.6564	9.77614	0.119742	0.537936	0.843174
Ighv5-15	immunoglobulin heavy variable 5-15	0	0	0	2.47219	0	4.16241	0	2.21154	2.21154	0.0115757	0.0520948
Mettl17	methyltransferase like 17	7.38807	8.3362	8.4058	9.04415	8.89773	9.15193	8.04336	9.03127	0.987912	0.000552514	0.00402445
Gm3264	predicted gene 3264	3.2397	2.58191	2.75439	2.82072	3.18065	2.31557	2.85867	2.77231	-0.0863551	0.924712	0.980249
Arhgef40	Rho guanine nucleotide exchange factor (GEF) 40	9.79414	10.6129	10.648	10.7844	10.662	10.5185	10.3517	10.655	0.303284	0.259474	0.560753
Tmem164	transmembrane protein 164	9.25056	10.2736	9.49461	10.0531	9.57946	9.35838	9.67293	9.66365	-0.00928207	0.865402	0.94812
D030056L22Rik	RIKEN cDNA D030056L22 gene	7.76139	7.61107	7.21455	7.9813	7.7035	7.86244	7.529	7.84908	0.320079	0.168838	0.41573
Snora17	small nucleolar RNA, H/ACA box 17	4.50578	2.319	2.27256	2.96778	3.64668	2.99304	3.03245	3.2025	0.170055	0.815705	0.933154
Prr15l	proline rich 15-like	5.16954	6.6688	5.58314	5.39025	5.40899	4.38474	5.80716	5.06133	-0.745834	0.105516	0.296969
Gm10382	predicted gene 10382	6.39666	5.04084	6.88105	5.13408	4.51706	4.57734	6.10618	4.74283	-1.36336	0.00281895	0.0159718
Gm22270	predicted gene, 22270	3.2397	2.319	0.969343	2.65696	1.72461	1.99404	2.17601	2.1252	-0.0508132	0.802061	0.933154
Gm13181	predicted gene 13181	1.7711	0.99817	2.27256	0	1.72461	1.99404	1.68061	1.23955	-0.44106	0.75202	0.927867
Gm9836	predicted pseudogene 9836	3.04254	3.58161	3.11496	2.96778	3.50742	3.4522	3.24637	3.30913	0.0627633	0.94168	0.980249
Gm10384	predicted gene 10384	2.2078	3.90347	2.27256	2.26024	1.72461	0	2.79461	1.32828	-1.46633	0.15078	0.383996
Rpsa-ps4	ribosomal protein S4, pseudogene 4	1.7711	2.319	3.11496	1.71125	0	0	2.40169	0.570415	-1.83127	0.12112	0.328741
Gm13899	predicted gene 13899	0	0	1.95377	0	0	0	0.651255	0	-0.651255	0.538612	0.843174
Gm13707	predicted gene 13707	0	1.58252	0	2.82072	1.72461	3.31477	0.527507	2.62003	2.09253	0.0540218	0.178722
Gm14302	predicted gene 14302	2.81411	2.319	0	0	0	0	1.71104	0	-1.71104	0.0824383	0.246932
4930455G09Rik	RIKEN cDNA 4930455G09 gene	1.7711	4.08402	3.74989	3.62903	3.18065	3.31477	3.20167	3.37482	0.173147	0.873697	0.953261
Lrrc75aos2	leucine rich repeat containing 75A, opposite strand 2	0	0	0	2.47219	0	2.57834	0	1.68351	1.68351	0.0976482	0.279796
Smc2os	structural maintenance of chromosomes 2, opposite strand	0	1.99725	0	0	0	0	0.665751	0	-0.665751	0.529599	0.841417
Gm12333	predicted gene 12333	2.2078	0	0	0	0	0	0.735934	0	-0.735934	0.48784	0.81057
2810430I11Rik	RIKEN cDNA 2810430I11 gene	2.54257	4.38883	3.52825	2.47219	4.19273	4.38474	3.48655	3.68322	0.19667	0.788431	0.928245
Gm13563	predicted gene 13563	5.39312	5.61112	5.5243	5.89184	5.59247	6.05825	5.50951	5.84752	0.338006	0.302562	0.620671
Pcsk1	proprotein convertase subtilisin/kexin type 1	0	2.9968	0	3.9453	3.89039	2.80054	0.998932	3.54541	2.54648	0.0688272	0.215403
Gm43637	predicted gene 43637	0	1.58252	1.54394	0	2.75751	1.99404	1.04215	1.58385	0.541694	0.540019	0.844461
Nnat	neuronatin	6.33331	4.69692	6.10882	4.47431	4.7817	4.31437	5.71302	4.52346	-1.18956	0.00792986	0.0381947
Lect2	leukocyte cell-derived chemotaxin 2	0	1.99725	2.75439	0	0	0	1.58388	0	-1.58388	0.107904	0.3014
Gm5652	predicted gene 5652	0	0	1.54394	0	0	0	0.514647	0	-0.514647	0.642125	0.875654
Tmem176b	transmembrane protein 176B	9.67569	11.2143	9.9852	10.6424	9.85373	10.2257	10.2917	10.2406	-0.0511231	0.616655	0.875654
Aoc1	amine oxidase, copper-containing 1	0	3.69706	1.54394	4.42424	0	0	1.747	1.47475	-0.272252	0.863458	0.947092
1600015I10Rik	RIKEN cDNA 1600015I10 gene	0	0	0	2.65696	3.64668	2.57834	0	2.96066	2.96066	0.00156469	0.00972944
Aprt	adenine phosphoribosyl transferase	9.67142	9.91967	9.43596	8.45952	8.24838	8.4057	9.67568	8.3712	-1.30449	4.07e-13	2.27e-11
Malsu1	mitochondrial assembly of ribosomal large subunit 1	8.5085	8.09438	8.6106	8.57874	8.29147	8.35401	8.40449	8.40807	0.0035793	0.9787	0.99083
Gpnmb	glycoprotein (transmembrane) nmb	7.50768	8.05705	8.5381	6.64842	6.57744	6.36718	8.03427	6.53102	-1.50326	1.9e-07	3.69e-06
Tra2a	transformer 2 alpha homolog (Drosophila)	10.5745	10.7336	10.4763	10.4834	10.476	10.172	10.5948	10.3771	-0.217642	0.154574	0.391126
Cdt1	chromatin licensing and DNA replication factor 1	6.91229	7.63298	7.22383	5.8733	5.5576	6.18198	7.25637	5.87096	-1.38541	9.07e-06	0.000115096
Mnd1-ps	Mnd1 retrotransposed pseudogene	1.7711	0	0	0	2.15619	0	0.590366	0.718729	0.128363	0.866059	0.948374
Runx1t1	runt-related transcription factor 1; translocated to, 1 (cyclin D-related)	5.47367	6.20584	6.46227	6.87032	7.03592	6.4184	6.04726	6.77488	0.727619	0.048819	0.165392
4930570N18Rik	RIKEN cDNA 4930570N18 gene	1.7711	0	0	0.814054	0	0	0.590366	0.271351	-0.319015	0.752947	0.927867
Bcl2l2	BCL2-like 2	10.5926	10.307	10.5711	10.2429	10.3968	10.2867	10.4902	10.3088	-0.18142	0.182044	0.438169
Gm15722	predicted gene 15722	0	1.58252	0	2.82072	1.72461	0	0.527507	1.51511	0.987603	0.348831	0.679807
Trbd1	T cell receptor beta, D region 1	0	0.99817	0	0	1.10598	0.996028	0.332723	0.70067	0.367946	0.783766	0.927867
H2al1g	H2A histone family member L1G	0	0	0	0	1.10598	0	0	0.36866	0.36866	0.839626	0.933154
Mfsd6	major facilitator superfamily domain containing 6	8.99825	9.29784	9.26904	9.44967	9.99565	9.77505	9.18837	9.74012	0.55175	0.00304222	0.0169767
Klf4	Kruppel-like factor 4 (gut)	10.6801	10.2046	11.4309	10.6682	10.5643	10.3452	10.7719	10.5259	-0.245963	0.229392	0.516136
Ap1m1	adaptor-related protein complex AP-1, mu subunit 1	10.7825	10.747	10.5315	10.748	10.635	10.8469	10.687	10.7433	0.0562996	0.684229	0.895741
Cdkn1b	cyclin-dependent kinase inhibitor 1B	9.64122	9.83397	10.0189	10.1802	10.4054	10.2003	9.83136	10.262	0.4306	0.00643476	0.0319586
AC115785.1	---	0	0	2.27256	0	0	0	0.75752	0	-0.75752	0.470221	0.797323
Hmgn2	high mobility group nucleosomal binding domain 2	10.5127	10.9462	10.3261	10.7669	11.0579	10.9708	10.595	10.9319	0.33688	0.0933753	0.270805
Fam32a	family with sequence similarity 32, member A	9.95886	10.1899	10.2735	9.88978	9.86447	10.188	10.1407	9.98076	-0.159967	0.322159	0.647717
Gm22275	predicted gene, 22275	0	0	0	0	1.10598	0	0	0.36866	0.36866	0.839626	0.933154
Kcna3	potassium voltage-gated channel, shaker-related subfamily, member 3	2.2078	0	0	1.3313	0	0	0.735934	0.443766	-0.292168	0.723712	0.912678
Gm11510	predicted gene 11510	2.54257	0.99817	1.54394	3.79581	3.35327	2.80054	1.69489	3.31654	1.62165	0.0559688	0.183421
Gm11270	predicted gene 11270	0	0	0.969343	0	0	0	0.323114	0	-0.323114	0.787905	0.927867
Gp5	glycoprotein 5 (platelet)	4.65142	3.58161	4.89426	3.10122	2.48795	2.57834	4.37576	2.7225	-1.65326	0.00745578	0.036257
Rpl10a-ps1	ribosomal protein L10A, pseudogene 1	9.94833	10.1308	9.99607	9.46058	9.3181	9.57514	10.0251	9.45127	-0.573783	5.31e-05	0.000540845
Gm44056	predicted gene, 44056	0	1.58252	0	1.3313	0	1.57966	0.527507	0.970321	0.442813	0.756887	0.927867
Gm31048	predicted gene, 31048	0	1.58252	0	0	0	0	0.527507	0	-0.527507	0.632842	0.875654
Wdr5b	WD repeat domain 5B	6.17368	7.45579	6.16768	7.78204	7.78867	8.06354	6.59905	7.87808	1.27903	0.00159457	0.00988483
Gm43684	predicted gene 43684	1.7711	2.58191	6.04746	1.3313	1.72461	1.57966	3.46682	1.54519	-1.92163	0.00255336	0.0146783
Tkfc	triokinase, FMN cyclase	7.35656	7.92709	7.82703	7.88279	7.56109	8.13673	7.70356	7.86021	0.156648	0.536941	0.843174
Tulp4	tubby like protein 4	10.9254	10.5738	11.0557	9.91152	10.1039	10.0702	10.8516	10.0285	-0.823089	4.21e-07	7.55e-06
Smim26	small integral membrane protein 26	7.47869	7.62571	7.3221	8.50237	8.52152	8.63231	7.4755	8.55207	1.07657	4.61e-09	1.27e-07
Gm12419	predicted gene 12419	0	0	0	0	0	1.57966	0	0.526555	0.526555	0.659841	0.87912
Gm44063	predicted gene, 44063	0	0	0	0	1.10598	0	0	0.36866	0.36866	0.839626	0.933154
Gm13350	predicted gene 13350	0	1.99725	0	0	0	0	0.665751	0	-0.665751	0.529599	0.841417
Gm22277	predicted gene, 22277	0	0	0	1.71125	0	0	0	0.570415	0.570415	0.616793	0.875654
Gm22282	predicted gene, 22282	0	0	0	0	0	0.996028	0	0.332009	0.332009	0.839626	0.933154
Rbpjl	recombination signal binding protein for immunoglobulin kappa J region-like	0	1.99725	0	1.3313	0	0	0.665751	0.443766	-0.221986	0.787415	0.927867
Slpi	secretory leukocyte peptidase inhibitor	8.01122	9.45577	8.06237	6.35969	3.89039	5.24018	8.50979	5.16342	-3.34637	7.14e-05	0.000701323
Sdc4	syndecan 4	12.6837	11.1587	11.8065	9.36263	8.89074	9.05815	11.883	9.10384	-2.77913	1.11e-19	1.44e-17
Tcaim	T cell activation inhibitor, mitochondrial	9.83473	9.34949	9.66431	10.2063	10.2986	10.4391	9.61618	10.3147	0.698509	4.42e-05	0.000461646
Slco1a6	solute carrier organic anion transporter family, member 1a6	0	0	2.27256	0	0	0	0.75752	0	-0.75752	0.470221	0.797323
Hrk	harakiri, BCL2 interacting protein (contains only BH3 domain)	0	3.80395	2.94591	5.03747	5.40899	5.12156	2.24996	5.18934	2.93938	0.00110599	0.00726797
Tmppe	transmembrane protein with metallophosphoesterase domain	6.24426	6.26317	6.12871	5.8162	6.67829	5.69264	6.21205	6.06238	-0.14967	0.805764	0.933154
B3gntl1	UDP-GlcNAc:betaGal beta-1,3-N-acetylglucosaminyltransferase-like 1	6.17368	7.39724	7.05742	6.987	7.35311	7.65742	6.87611	7.33251	0.456399	0.260332	0.562287
Itga2	integrin alpha 2	5.93848	6.33623	5.93901	5.0704	4.2809	4.69279	6.07124	4.68136	-1.38988	0.000483378	0.00358991
Mocs2	molybdenum cofactor synthesis 2	10.3232	9.85121	9.89519	9.76836	9.75904	9.87622	10.0232	9.80121	-0.222004	0.166306	0.412006
Mettl24	methyltransferase like 24	3.70771	4.80382	5.39889	4.70148	4.2809	4.8503	4.63681	4.61089	-0.0259146	0.754271	0.927867
Gm11953	predicted gene 11953	0	1.58252	0	0	0	0	0.527507	0	-0.527507	0.632842	0.875654
Gm6657	predicted gene 6657	0	0	0	0	1.10598	0	0	0.36866	0.36866	0.839626	0.933154
Gm17767	predicted gene, 17767	3.04254	0.99817	0	0	1.72461	1.57966	1.3469	1.10142	-0.24548	0.614719	0.875654
Pdcd2l	programmed cell death 2-like	7.57313	8.30013	7.96617	8.29862	8.25927	8.57703	7.94648	8.37831	0.431832	0.0834336	0.249248
Haao	3-hydroxyanthranilate 3,4-dioxygenase	5.35109	5.24436	2.27256	4.74292	4.19273	3.89947	4.28934	4.27837	-0.0109655	0.520401	0.838189
Smim7	small integral membrane protein 7	11.5223	11.1725	11.4931	11.1306	11.2228	11.2577	11.396	11.2037	-0.192272	0.164075	0.408021
Gm9294	predicted pseudogene 9294	4.90485	5.24436	4.52562	4.74292	4.44255	4.8503	4.89161	4.67859	-0.21302	0.608878	0.875654
---	---	7.83947	7.80371	8.50043	8.01129	7.42259	3.99254	8.04787	6.47548	-1.57239	0.37584	0.710131
Grid1	glutamate receptor, ionotropic, delta 1	0	0	1.54394	0	0	1.99404	0.514647	0.664679	0.150033	0.852288	0.939952
Rwdd2b	RWD domain containing 2B	6.83816	7.42262	6.12871	7.34416	6.9974	7.2775	6.7965	7.20635	0.409854	0.345408	0.676348
Fzd7	frizzled class receptor 7	8.15861	7.77114	8.43804	8.38295	8.17549	8.41833	8.1226	8.32559	0.202993	0.412859	0.746824
AC155273.1	---	0	1.99725	1.54394	1.3313	2.75751	2.57834	1.1804	2.22238	1.04198	0.363179	0.69553
Gm45512	predicted gene 45512	4.50578	3.99657	4.94	3.5378	3.89039	3.6931	4.48078	3.7071	-0.773686	0.122786	0.331809
Nhsl2	NHS-like 2	8.61888	8.70715	8.84804	8.13317	8.29147	7.82497	8.72469	8.0832	-0.64149	0.000931153	0.00626997
Med12	mediator complex subunit 12	11.0595	10.8559	11.6127	10.4486	10.5926	10.4025	11.176	10.4812	-0.694773	0.000400668	0.00305425
Phyhd1	phytanoyl-CoA dioxygenase domain containing 1	10.4838	9.96068	9.84798	10.0776	10.1989	10.6467	10.0975	10.3077	0.210235	0.358666	0.690642
Gm42991	predicted gene 42991	0	0	0	1.71125	2.48795	0	0	1.39973	1.39973	0.19517	0.460832
Rpl17-ps10	ribosomal protein L17, pseudogene 10	8.78987	8.81653	8.79303	8.37309	8.12278	8.43086	8.79981	8.30891	-0.490898	0.00345997	0.0189243
Gm45632	predicted gene 45632	3.70771	2.58191	3.94197	2.65696	3.50742	0	3.41053	2.05479	-1.35574	0.330446	0.657302
Adam28	a disintegrin and metallopeptidase domain 28	4.50578	8.72427	0	5.0704	0	0	4.41002	1.69013	-2.71988	0.31347	0.636285
Gm5431	predicted gene 5431	2.54257	6.30017	5.8698	5.22462	5.75523	5.07974	4.90418	5.3532	0.449018	0.775954	0.927867
Tbx2	T-box 2	8.31437	7.9679	8.52315	8.56436	8.38893	8.35401	8.26847	8.43577	0.167297	0.452636	0.786069
Tbx4	T-box 4	2.2078	4.08402	1.95377	4.08075	0	0	2.74853	1.36025	-1.38828	0.760142	0.927867
Tmem37	transmembrane protein 37	6.07385	7.04076	6.34816	5.98112	5.28655	5.51578	6.48759	5.59448	-0.893106	0.0166737	0.0702393
Pcsk9	proprotein convertase subtilisin/kexin type 9	4.16124	3.69706	4.26311	3.4404	2.75751	2.80054	4.04047	2.99948	-1.04099	0.0989961	0.282935
Wdr47	WD repeat domain 47	7.73712	8.20092	8.00435	7.77207	7.93852	8.14182	7.9808	7.9508	-0.029993	0.859578	0.945451
Ppp1ca	protein phosphatase 1, catalytic subunit, alpha isoform	12.3891	12.3462	12.3838	12.419	12.3255	12.4882	12.373	12.4109	0.0378501	0.72664	0.914897
Klhl32	kelch-like 32	4.16124	6.24431	4.98433	6.8131	7.09792	7.32301	5.12996	7.07801	1.94805	0.000335103	0.00263192
---	---	2.2078	2.9968	2.5335	2.47219	2.15619	2.31557	2.57937	2.31465	-0.264716	0.708568	0.909308
---	---	0	0	1.95377	0	0	0	0.651255	0	-0.651255	0.538612	0.843174
Cbln3	cerebellin 3 precursor protein	3.04254	3.4561	2.75439	3.5378	2.98454	1.99404	3.08435	2.83879	-0.245556	0.863685	0.947092
Aqr	aquarius	10.1067	9.65455	9.81153	9.76208	9.6983	9.68031	9.85759	9.71356	-0.144032	0.337624	0.666298
Gm45104	predicted gene 45104	4.16124	1.58252	3.4032	1.3313	1.72461	3.4522	3.04899	2.16937	-0.879617	0.332024	0.659111
Gm32849	predicted gene, 32849	3.41313	5.85438	4.69525	7.12661	7.04854	7.30498	4.65425	7.16004	2.50579	9.08e-06	0.000115172
Gm44954	predicted gene 44954	0	1.99725	0	2.0117	1.72461	2.99304	0.665751	2.24312	1.57737	0.221355	0.503701
Gm26912	predicted gene, 26912	0	3.80395	2.94591	3.10122	2.15619	2.99304	2.24996	2.75015	0.500194	0.904066	0.96913
Slc16a6	solute carrier family 16 (monocarboxylic acid transporters), member 6	8.84769	9.49419	8.95495	8.65669	8.53054	9.08746	9.09895	8.75823	-0.340716	0.140693	0.365369
Metap1d	methionyl aminopeptidase type 1D (mitochondrial)	10.0155	9.75789	9.50796	10.6458	10.764	10.6829	9.76044	10.6976	0.937137	1.42e-08	3.52e-07
Rnpep	arginyl aminopeptidase (aminopeptidase B)	9.30661	10.3768	9.17174	9.99642	9.72408	9.87927	9.61839	9.86659	0.248206	0.620697	0.875654
Acad11	acyl-Coenzyme A dehydrogenase family, member 11	10.7054	10.6643	10.0282	11.8156	11.9999	12.2361	10.466	12.0172	1.55122	2.8e-13	1.61e-11
Gja6	gap junction protein, alpha 6	1.7711	1.58252	0	2.65696	3.18065	1.57966	1.11787	2.47242	1.35455	0.178313	0.431381
Tmem191c	transmembrane protein 191C	6.96897	6.48823	6.63907	6.8228	6.15582	7.02553	6.69876	6.66805	-0.0307079	0.98186	0.992208
Gm8580	predicted gene 8580	0	0	0	1.3313	0	0.996028	0	0.775775	0.775775	0.594108	0.875654
Gm25835	predicted gene, 25835	4.96182	4.31845	4.52562	2.96778	2.48795	3.16286	4.60196	2.87286	-1.7291	0.00273934	0.0155936
Meg3	maternally expressed 3	9.701	10.6563	11.0328	10.3854	9.84109	9.77505	10.4634	10.0005	-0.462848	0.0769479	0.23471
Negr1	neuronal growth regulator 1	3.70771	6.18621	5.46296	6.92535	6.52425	6.24008	5.11896	6.56322	1.44426	0.0292105	0.109962
Disp2	dispatched RND tramsporter family member 2	4.06051	5.28183	4.11146	3.71483	2.48795	4.07998	4.4846	3.42759	-1.05702	0.109208	0.304353
Nup43	nucleoporin 43	6.82287	7.22518	6.96087	6.48708	6.95783	6.54672	7.00297	6.66388	-0.339099	0.207015	0.479973
Stat2	signal transducer and activator of transcription 2	9.95536	10.3171	10.4606	10.4281	10.2639	10.3038	10.2444	10.3319	0.0875561	0.658767	0.87912
Olfr55	olfactory receptor 55	0	0	0	2.65696	3.35327	0	0	2.00341	2.00341	0.0354927	0.128199
Cyp2d22	cytochrome P450, family 2, subfamily d, polypeptide 22	10.5983	9.72256	10.9994	10.3968	10.3091	10.4556	10.4401	10.3872	-0.0529004	0.5978	0.875654
Slc22a12	solute carrier family 22 (organic anion/cation transporter), member 12	4.78369	2.319	3.84913	1.3313	1.72461	1.99404	3.65061	1.68331	-1.96729	0.00696253	0.0342597
Gm43846	predicted gene 43846	0	1.58252	0	2.0117	1.72461	1.99404	0.527507	1.91012	1.38261	0.271756	0.578792
Gm44457	predicted gene, 44457	0	0	0	0	0	0.996028	0	0.332009	0.332009	0.839626	0.933154
Olfr78	olfactory receptor 78	2.54257	5.51998	4.46433	7.14218	7.35311	6.67862	4.17563	7.05797	2.88234	8.41e-06	0.000107896
Gm42769	predicted gene 42769	0	1.58252	0	0	0	0	0.527507	0	-0.527507	0.632842	0.875654
Gm43693	predicted gene 43693	0	2.80422	1.54394	2.0117	0	3.16286	1.44939	1.72485	0.275468	0.771268	0.927867
Gm9256	predicted gene 9256	1.7711	2.80422	1.95377	1.3313	2.98454	0.996028	2.17636	1.77062	-0.40574	0.802003	0.933154
Fbxw5	F-box and WD-40 domain protein 5	10.6272	10.5671	10.677	11.2924	11.0603	11.4136	10.6238	11.2554	0.631651	4.99e-06	6.82e-05
Npdc1	neural proliferation, differentiation and control 1	9.83473	10.0215	9.66941	10.0219	9.64114	9.84692	9.84188	9.83665	-0.00522315	0.987396	0.995113
Clic3	chloride intracellular channel 3	4.84554	5.82929	5.46296	6.19029	5.19873	6.01454	5.37926	5.80119	0.421922	0.318048	0.642777
Edf1	endothelial differentiation-related factor 1	11.1139	11.1107	11.0075	11.6108	11.4171	11.6715	11.0774	11.5665	0.489114	0.000110809	0.00102743
Ptgds	prostaglandin D2 synthase (brain)	12.6063	11.985	13.0736	12.7176	12.9629	13.7198	12.555	13.1334	0.578465	0.061398	0.197144
Gm32098	predicted gene, 32098	2.54257	2.58191	0	2.47219	0	1.99404	1.70816	1.48874	-0.219418	0.833157	0.933154
Btbd35f17	BTB domain containing 35, family member 17	0	0	0	0.814054	0	0	0	0.271351	0.271351	0.839626	0.933154
Usp34	ubiquitin specific peptidase 34	11.0513	10.5662	10.6428	10.0469	10.4285	9.98499	10.7534	10.1535	-0.599956	0.00167583	0.0103168
Gmds	GDP-mannose 4, 6-dehydratase	7.19962	8.06781	7.44616	7.21023	6.95783	7.16203	7.5712	7.11003	-0.461171	0.0740731	0.227682
Acot10	acyl-CoA thioesterase 10	2.54257	3.16667	3.26627	2.47219	3.50742	2.31557	2.99184	2.76506	-0.226776	0.801076	0.933154
Mmp10	matrix metallopeptidase 10	0	0	2.27256	0	0	0	0.75752	0	-0.75752	0.470221	0.797323
Zfp746	zinc finger protein 746	9.48966	8.6257	9.51742	8.82532	8.57045	8.74695	9.21093	8.71424	-0.49669	0.0286698	0.108387
Vmn1r53	vomeronasal 1 receptor 53	0	0	1.54394	0	0	0	0.514647	0	-0.514647	0.642125	0.875654
Rpl30-ps1	ribosomal protein L30, pseudogene 1	0	1.58252	2.94591	0.814054	2.15619	0.996028	1.50948	1.32209	-0.187389	0.616522	0.875654
Tarm1	T cell-interacting, activating receptor on myeloid cells 1	7.97709	7.86054	6.79655	2.0117	1.72461	3.89947	7.54472	2.54526	-4.99947	3.08e-18	3.43e-16
Pard3bos3	par-3 family cell polarity regulator beta, opposite strand 3	1.1418	0	0	0.814054	2.15619	0.996028	0.380602	1.32209	0.941488	0.337766	0.666448
Gm13068	predicted gene 13068	3.41313	2.58191	4.52562	1.71125	1.72461	3.16286	3.50689	2.19957	-1.30732	0.0980034	0.280654
1700095J03Rik	RIKEN cDNA 1700095J03 gene	2.81411	0	0	2.0117	0	2.57834	0.938036	1.53001	0.591977	0.821308	0.933154
Gm16155	predicted gene 16155	0	1.58252	0	0	0	0	0.527507	0	-0.527507	0.632842	0.875654
C530005A16Rik	RIKEN cDNA C530005A16 gene	3.83514	4.75136	3.26627	6.52321	6.43098	6.29593	3.95092	6.4167	2.46578	1.17e-07	2.37e-06
Gas5	growth arrest specific 5	12.6037	11.3216	11.0757	10.4704	10.3144	10.3595	11.667	10.3814	-1.28562	1.23e-05	0.000151179
Dis3l2	DIS3 like 3-5 exoribonuclease 2	7.9279	8.5662	8.7228	8.20905	8.03041	8.60309	8.40563	8.28085	-0.12478	0.577737	0.873815
Ficd	FIC domain containing	7.65313	8.37573	7.96617	8.53223	8.01764	8.46374	7.99834	8.33787	0.339526	0.191669	0.454863
Gm19196	predicted gene, 19196	4.96182	5.72433	5.36576	6.01534	6.22414	6.38446	5.35063	6.20798	0.857343	0.0192209	0.0784606
Gm45397	predicted gene 45397	3.95222	3.31863	0	2.65696	2.98454	0	2.42362	1.8805	-0.543121	0.511578	0.833538
Gm20478	predicted gene 20478	1.1418	0	0	0	0	0	0.380602	0	-0.380602	0.787905	0.927867
Phb	prohibitin	12.2659	12.1058	12.2031	12.7339	12.587	12.9333	12.1916	12.7514	0.559795	6.64e-05	0.000657096
Kif16b	kinesin family member 16B	9.63904	9.60182	9.71781	9.80306	10.1587	10.1006	9.65289	10.0208	0.36789	0.0134377	0.0590451
Gm42470	predicted gene 42470	1.7711	1.58252	2.94591	1.71125	2.15619	0.996028	2.09985	1.62115	-0.478691	0.550413	0.85301
Birc7	baculoviral IAP repeat-containing 7 (livin)	0	0	0	1.71125	0	0	0	0.570415	0.570415	0.616793	0.875654
Gcnt1	glucosaminyl (N-acetyl) transferase 1, core 2	8.32526	9.09963	9.08534	7.07075	6.84665	6.67862	8.83674	6.86534	-1.9714	2.27e-14	1.52e-12
Mir697	microRNA 697	1.1418	1.99725	0	1.3313	2.15619	1.57966	1.04635	1.68905	0.642697	0.66077	0.879856
Ythdf1	YTH domain family 1	10.9019	9.86516	10.5445	9.77587	9.78189	9.80263	10.4372	9.78679	-0.650394	0.00301184	0.0168298
Gm2253	predicted gene 2253	2.2078	0.99817	2.5335	1.3313	3.18065	0	1.91316	1.50398	-0.409174	0.995316	0.997401
Gm20100	predicted gene, 20100	5.58665	3.69706	6.02641	2.65696	4.7817	3.16286	5.10337	3.53384	-1.56954	0.0305873	0.114211
G630064G18Rik	RIKEN cDNA G630064G18 gene	0	0	0	2.82072	0	2.31557	0	1.7121	1.7121	0.0869681	0.257245
Gm45631	predicted gene 45631	0	0	2.27256	1.3313	0	2.57834	0.75752	1.30321	0.545692	0.735129	0.920346
Gm45486	predicted gene 45486	3.04254	2.9968	4.69525	0.814054	1.72461	2.57834	3.5782	1.70567	-1.87253	0.0222349	0.0881204
Gm22301	predicted gene, 22301	0	0	1.54394	0.814054	0	0	0.514647	0.271351	-0.243295	0.820288	0.933154
9330121K16Rik	RIKEN cDNA 9330121K16 gene	0	0	0	0	1.72461	1.57966	0	1.10142	1.10142	0.383848	0.717962
Trdv1	T cell receptor delta variable 1	0	0	0	1.3313	0	0	0	0.443766	0.443766	0.717611	0.909308
Trdv4	T cell receptor delta variable 4	2.2078	1.99725	0	2.82072	2.98454	2.57834	1.40169	2.79453	1.39285	0.211603	0.487377
Trdv2-2	T cell receptor delta variable 2-2	0	0	0	1.3313	0	0	0	0.443766	0.443766	0.717611	0.909308
Kpna2	karyopherin (importin) alpha 2	10.4331	10.1397	9.49461	9.57255	9.67611	9.43293	10.0225	9.56053	-0.461945	0.0293861	0.110495
Smurf2	SMAD specific E3 ubiquitin protein ligase 2	10.2608	9.86671	10.0308	9.96722	10.0656	9.92574	10.0528	9.98618	-0.0665883	0.626351	0.875654
AC126549.2	---	0	0	0	0	2.15619	1.57966	0	1.24528	1.24528	0.287017	0.600077
Skiv2l2	superkiller viralicidic activity 2-like 2 (S. cerevisiae)	10.4	10.3833	10.3506	10.2393	10.3091	10.2494	10.378	10.2659	-0.112016	0.318826	0.64375
4931406P16Rik	RIKEN cDNA 4931406P16 gene	10.8641	9.92264	11.0985	10.3082	10.5466	10.1431	10.6284	10.3326	-0.295815	0.173098	0.423179
Gm7019	predicted pseudogene 7019	1.7711	2.319	0	2.0117	0	0	1.36337	0.670568	-0.692798	0.652237	0.87912
Gm36992	predicted gene, 36992	0	0.99817	0	0	0	0	0.332723	0	-0.332723	0.787905	0.927867
Gm36995	predicted gene, 36995	7.37764	7.38006	8.13791	7.79687	6.94439	7.22092	7.63187	7.32073	-0.311146	0.333291	0.660846
Gm2272	predicted gene 2272	0	0	0	0.814054	0	1.99404	0	0.936031	0.936031	0.441374	0.775746
6720464F23Rik	RIKEN cDNA 6720464F23 gene	1.7711	1.58252	0	0	1.72461	1.99404	1.11787	1.23955	0.121675	0.896008	0.966064
Gm26922	predicted gene, 26922	1.1418	0	0	0	1.10598	0	0.380602	0.36866	-0.0119413	0.973412	0.988172
Fate1	fetal and adult testis expressed 1	0	0	1.54394	0	0	0	0.514647	0	-0.514647	0.642125	0.875654
Slitrk5	SLIT and NTRK-like family, member 5	4.06051	1.58252	2.75439	2.82072	0	2.80054	2.79914	1.87375	-0.92539	0.439664	0.774369
Ppp2ca	protein phosphatase 2 (formerly 2A), catalytic subunit, alpha isoform	12.7203	12.3078	12.625	12.1928	12.2211	12.4373	12.551	12.2838	-0.267253	0.0866097	0.256436
Sapcd2	suppressor APC domain containing 2	0	3.16667	0	3.5378	2.75751	0	1.05556	2.09843	1.04288	0.571305	0.868203
Zfp869	zinc finger protein 869	10.0683	9.46598	10.0929	9.54206	9.69027	9.47184	9.87572	9.56806	-0.307669	0.0947033	0.273608
Gm43920	predicted gene, 43920	0	0	0	0	0	1.57966	0	0.526555	0.526555	0.659841	0.87912
Gm44183	predicted gene, 44183	0	0	0.969343	0	1.72461	0	0.323114	0.574869	0.251755	0.792994	0.931122
Mmrn1	multimerin 1	8.47953	7.3714	8.90681	8.06128	8.56607	8.22089	8.25258	8.28275	0.0301676	0.800392	0.933154
Slc8a1	solute carrier family 8 (sodium/calcium exchanger), member 1	12.7841	13.0988	13.5526	12.6734	13.1805	13.1116	13.1452	12.9885	-0.156654	0.441019	0.775595
Zfp39	zinc finger protein 39	6.89777	7.31829	6.74594	7.57965	7.79617	7.64314	6.98733	7.67299	0.685654	0.00596293	0.0300337
Gm36933	predicted gene, 36933	0	0	0	1.3313	3.89039	2.80054	0	2.67408	2.67408	0.00366785	0.0198916
Tlnrd1	talin rod domain containing 1	9.08414	9.04891	8.74552	9.18046	8.77785	8.76355	8.95952	8.90729	-0.0522345	0.82132	0.933154
Osr1	odd-skipped related 1 (Drosophila)	7.78526	9.25844	8.12311	7.85944	7.78114	7.48394	8.38894	7.70817	-0.680766	0.0216158	0.0862385
Szt2	seizure threshold 2	10.182	9.99352	10.3622	9.87588	9.98912	9.74192	10.1793	9.86898	-0.310291	0.0422568	0.147497
Gm5134	predicted gene 5134	0	1.58252	0	1.71125	1.72461	1.57966	0.527507	1.67184	1.14433	0.390947	0.724651
Fam171b	family with sequence similarity 171, member B	3.56793	5.551	5.58314	5.00378	5.69231	5.38455	4.90069	5.36021	0.459524	0.685461	0.896657
Ttll4	tubulin tyrosine ligase-like family, member 4	9.73204	9.23952	9.64373	8.85868	8.92535	8.80584	9.53843	8.86329	-0.675134	0.000108009	0.00100484
Shf	Src homology 2 domain containing F	6.24426	6.16631	5.98337	5.9637	6.46901	6.65034	6.13132	6.36102	0.229698	0.429891	0.764007
Lats2	large tumor suppressor 2	10.2749	10.0718	10.3443	10.1942	10.0594	9.91092	10.2303	10.0548	-0.175488	0.237717	0.528386
Pinx1	PIN2/TERF1 interacting, telomerase inhibitor 1	8.20654	7.68286	7.40598	7.19538	7.41287	7.15197	7.76513	7.25341	-0.511717	0.0403937	0.142454
Eef1akmt1	eukaryotic translation elongation factor 1 alpha lysine methyltransferase 1	7.4689	8.30469	7.52331	9.05447	8.95246	9.15948	7.76563	9.05547	1.28983	7.73e-07	1.3e-05
Anxa8	annexin A8	8.53689	9.4922	8.91256	7.22493	6.08411	6.46787	8.98055	6.5923	-2.38825	2.54e-12	1.24e-10
Aplf	aprataxin and PNKP like factor	6.55314	7.17627	5.77202	7.06259	6.72619	6.70637	6.50048	6.83172	0.331238	0.534406	0.843174
Tkt	transketolase	11.508	11.5832	10.8981	12.4715	10.3274	10.8686	11.3298	11.2225	-0.107257	0.805519	0.933154
---	---	4.50578	5.75129	4.11146	5.28197	4.84091	5.03668	4.78951	5.05319	0.263675	0.852641	0.94017
---	---	4.58044	2.58191	2.94591	3.33596	2.98454	3.79997	3.36942	3.37349	0.00406833	0.77046	0.927867
Lrrc73	leucine rich repeat containing 73	3.70771	3.4561	3.52825	4.56951	3.77368	3.4522	3.56402	3.9318	0.367775	0.440558	0.7755
Ptges3	prostaglandin E synthase 3	11.5481	11.0671	10.8908	10.6479	10.7262	10.6114	11.1687	10.6618	-0.506869	0.00454634	0.0238833
Gm28527	predicted gene 28527	1.1418	0.99817	0.969343	0	0	0.996028	1.03644	0.332009	-0.70443	0.531421	0.841927
2610306M01Rik	RIKEN cDNA 2610306M01 gene	5.54997	6.93888	6.56802	7.20283	7.16896	7.15197	6.35229	7.17459	0.8223	0.0446864	0.154302
Yipf3	Yip1 domain family, member 3	9.83092	9.78098	9.85396	10.1487	9.85731	10.157	9.82195	10.0543	0.232376	0.0931449	0.270343
Aldh3a1	aldehyde dehydrogenase family 3, subfamily A1	6.82287	7.48017	6.47786	7.60796	5.81552	5.24018	6.92697	6.22122	-0.705748	0.47946	0.805329
Iqce	IQ motif containing E	6.8831	8.21552	7.88079	8.28115	7.97202	8.04192	7.6598	8.09836	0.438559	0.284359	0.597156
Stpg4	sperm tail PG rich repeat containing 4	2.54257	1.58252	2.75439	0	0	0	2.29316	0	-2.29316	0.0169481	0.0711182
Akap14	A kinase (PRKA) anchor protein 14	2.54257	0	0	2.65696	0	0	0.847525	0.885652	0.0381276	0.939657	0.980249
Cnot1	CCR4-NOT transcription complex, subunit 1	11.4748	11.1663	11.4709	10.8867	11.1235	11.0303	11.3706	11.0135	-0.35715	0.0135509	0.0594615
Sh3tc1	SH3 domain and tetratricopeptide repeats 1	9.88714	9.52382	9.38932	9.22684	9.22393	8.9287	9.6001	9.12649	-0.473607	0.010414	0.0476671
Ermard	ER membrane associated RNA degradation	8.17074	8.40998	8.21899	8.52333	8.73947	8.50777	8.26657	8.59019	0.323618	0.0647792	0.205588
Wbp1	WW domain binding protein 1	9.62147	9.17874	9.24418	10.3448	10.0484	10.2471	9.34813	10.2134	0.865305	8.29e-07	1.38e-05
Gm17191	predicted gene 17191	1.7711	0	0	0	0	0	0.590366	0	-0.590366	0.589356	0.875654
Cyp4f17	cytochrome P450, family 4, subfamily f, polypeptide 17	6.9965	7.41421	7.87492	7.81641	7.33263	7.93459	7.42854	7.69454	0.266001	0.402533	0.737211
Nod2	nucleotide-binding oligomerization domain containing 2	7.67033	6.93888	6.97193	6.75353	6.9974	7.04739	7.19371	6.93277	-0.260939	0.305868	0.625758
Zkscan5	zinc finger with KRAB and SCAN domains 5	9.77638	9.20336	10.4587	8.96538	8.9491	9.06888	9.81281	8.99445	-0.818358	0.00118105	0.00768129
Gm44750	predicted gene 44750	0	2.319	0	2.47219	3.89039	1.57966	0.773	2.64742	1.87442	0.127216	0.340048
Gm45094	predicted gene 45094	1.7711	2.319	4.0292	2.0117	2.48795	2.57834	2.70643	2.35933	-0.347104	0.426408	0.761637
Gm45191	predicted gene 45191	0	0	3.4032	0	0	0	1.1344	0	-1.1344	0.168573	0.415313
AA467197	expressed sequence AA467197	9.93949	9.11529	9.77572	3.5378	4.2809	1.99404	9.61016	3.27091	-6.33925	5.05e-57	8.06e-54
Lrrc71	leucine rich repeat containing 71	5.47367	6.65459	5.14918	6.38608	5.00523	5.24018	5.75915	5.54383	-0.215316	0.67178	0.886453
Noct	nocturnin	10.4025	9.87439	10.118	9.60942	9.34392	9.11618	10.1316	9.35651	-0.775134	9.05e-05	0.000862278
Gpr157	G protein-coupled receptor 157	8.8094	9.35829	9.37482	10.413	10.614	10.5975	9.18084	10.5415	1.36065	5.04e-13	2.78e-11
Gm5983	predicted gene 5983	1.1418	0	0	0.814054	0	0	0.380602	0.271351	-0.10925	0.973412	0.988172
Rnf141	ring finger protein 141	9.36586	9.94325	9.74383	9.82252	9.74167	9.78972	9.68431	9.78463	0.100321	0.650544	0.87912
Itgax	integrin alpha X	5.99416	8.31828	5.43128	5.79666	5.00523	5.51578	6.58124	5.43922	-1.14202	0.00884986	0.0416848
Itgam	integrin alpha M	12.4982	12.3544	11.9175	7.84047	7.19189	7.54668	12.2567	7.52635	-4.73035	2.77e-106	2.8e-102
A230107N01Rik	RIKEN cDNA A230107N01 gene	3.04254	3.31863	0	3.87249	3.99836	3.4522	2.12039	3.77435	1.65396	0.183067	0.439794
1300002E11Rik	RIKEN cDNA 1300002E11 gene	6.94091	7.35391	6.53859	7.75191	7.89727	7.93459	6.94447	7.86126	0.916788	0.000737598	0.0051391
Tgfb1i1	transforming growth factor beta 1 induced transcript 1	10.3448	10.299	9.87766	9.93629	9.832	9.8344	10.1738	9.86756	-0.306257	0.0546888	0.180377
Abcc1	ATP-binding cassette, sub-family C (CFTR/MRP), member 1	10.7963	10.6898	10.7654	9.90126	9.9375	10.0378	10.7505	9.95886	-0.791639	2.72e-11	1.13e-09
BC017158	cDNA sequence BC017158	7.76939	8.42261	7.82093	8.49026	8.06807	8.29585	8.00431	8.28473	0.280416	0.286268	0.59942
Slc5a2	solute carrier family 5 (sodium/glucose cotransporter), member 2	0	0	3.11496	1.3313	2.15619	1.57966	1.03832	1.68905	0.650729	0.919383	0.978203
Gm45234	predicted gene 45234	3.04254	1.99725	4.0292	1.71125	2.48795	0.996028	3.023	1.73174	-1.29126	0.107786	0.301211
Gm3756	predicted gene 3756	6.89777	7.57379	7.2513	6.47484	6.15582	6.4184	7.24095	6.34969	-0.891265	0.00125276	0.00806626
Gm25086	predicted gene, 25086	0	0	0.969343	0.814054	0	0	0.323114	0.271351	-0.051763	0.973412	0.988172
Gm18256	predicted gene, 18256	0	0	1.95377	0	1.72461	1.57966	0.651255	1.10142	0.450169	0.830911	0.933154
Dysf	dysferlin	12.4389	11.5355	11.5913	11.7062	11.7419	11.6649	11.8552	11.7043	-0.150909	0.372595	0.706419
Akain1	A kinase (PRKA) anchor inhibitor 1	0	0	0	2.26024	0	2.80054	0	1.68693	1.68693	0.0933705	0.270805
Gm10481	predicted gene 10481	2.2078	1.58252	1.95377	2.0117	2.48795	2.99304	1.9147	2.49757	0.582869	0.467055	0.796507
Gm44632	predicted gene 44632	2.2078	1.58252	0	0	0	0	1.26344	0	-1.26344	0.252023	0.54967
Kcnk3	potassium channel, subfamily K, member 3	9.7843	11.4496	11.4601	12.5109	12.3812	12.5952	10.898	12.4957	1.59773	3.63e-05	0.000390563
Nkpd1	NTPase, KAP family P-loop domain containing 1	1.7711	0	3.11496	1.71125	0	0	1.62869	0.570415	-1.05827	0.325849	0.651246
Csf3	colony stimulating factor 3 (granulocyte)	8.06421	6.10492	7.75848	1.3313	0	0	7.3092	0.443766	-6.86544	9.23e-13	4.83e-11
Mturn	maturin, neural progenitor differentiation regulator homolog (Xenopus)	7.67033	8.28175	8.08799	9.28935	9.35157	9.20638	8.01336	9.28244	1.26908	2.16e-10	7.94e-09
Sox2ot	SOX2 overlapping transcript (non-protein coding)	0	2.319	1.54394	2.65696	0	2.31557	1.28765	1.65751	0.369862	0.688616	0.898033
Gm42427	predicted gene 42427	5.43396	5.20589	5.1097	6.53505	6.7104	6.57709	5.24985	6.60751	1.35766	9.94e-06	0.000124876
Gm40040	predicted gene, 40040	0	0	0	0	0	1.57966	0	0.526555	0.526555	0.659841	0.87912
Dlec1	deleted in lung and esophageal cancer 1	1.7711	4.58145	0	5.51509	3.64668	2.99304	2.11752	4.0516	1.93409	0.265185	0.569562
AI115009	expressed sequence AI115009	0	0	0	0	0	1.57966	0	0.526555	0.526555	0.659841	0.87912
---	---	0	0	0	0	1.72461	0	0	0.574869	0.574869	0.625351	0.875654
E030044B06Rik	RIKEN cDNA E030044B06 gene	0	2.58191	0	3.87249	3.89039	4.38474	0.860637	4.04921	3.18857	0.0033749	0.0185427
---	---	8.95681	9.28636	9.09295	8.83253	8.70801	8.91687	9.11204	8.81914	-0.292904	0.0700001	0.218165
Prf1	perforin 1 (pore forming protein)	3.04254	0	2.94591	4.56951	2.48795	3.57767	1.99615	3.54505	1.54889	0.158805	0.39887
Gm7598	predicted gene 7598	2.2078	3.69706	2.94591	3.79581	3.89039	4.31437	2.95026	4.00019	1.04993	0.151451	0.385154
Islr	immunoglobulin superfamily containing leucine-rich repeat	7.61812	8.45578	8.05199	10.2733	10.1904	10.3162	8.04196	10.2599	2.21798	1.64e-24	3.41e-22
Sspn	sarcospan	10.5352	11.1562	10.7333	12.0536	12.3307	12.1351	10.8082	12.1732	1.36494	7.32e-13	3.92e-11
Atg101	autophagy related 101	8.75	8.54709	9.251	8.64581	8.2374	8.76025	8.84937	8.54782	-0.301545	0.189377	0.450759
Srgap3	SLIT-ROBO Rho GTPase activating protein 3	6.35474	7.20582	6.86928	5.98112	6.00865	5.66463	6.80994	5.8848	-0.925144	0.00323679	0.0178876
Rassf8	Ras association (RalGDS/AF-6) domain family (N-terminal) member 8	10.2693	9.96501	11.0725	9.80061	9.94595	9.85779	10.4356	9.86812	-0.567465	0.0132859	0.0585056
Mir338	microRNA 338	0	0	0	0.814054	0	0	0	0.271351	0.271351	0.839626	0.933154
Gm9392	predicted pseudogene 9392	6.82287	6.08385	6.34816	5.73639	6.05939	5.79954	6.41829	5.86511	-0.553185	0.0788871	0.239001
Arhgef28	Rho guanine nucleotide exchange factor (GEF) 28	7.17574	8.27247	8.242	8.19792	8.14645	7.66451	7.89674	8.00296	0.106221	0.893865	0.964939
Adgrg1	adhesion G protein-coupled receptor G1	12.1539	10.3395	11.4026	11.1403	10.665	10.9885	11.2987	10.9313	-0.367364	0.125789	0.337034
Katnb1	katanin p80 (WD40-containing) subunit B 1	8.01122	8.80048	9.11804	8.26346	8.20396	8.43915	8.64325	8.30219	-0.341056	0.136236	0.357317
Drc7	dynein regulatory complex subunit 7	3.95222	5.45585	1.54394	5.4161	0	0	3.65067	1.80537	-1.84531	0.846315	0.937259
Ciapin1	cytokine induced apoptosis inhibitor 1	10.5468	10.2252	11.1753	10.6211	10.736	10.7718	10.6491	10.7096	0.0605097	0.978267	0.990588
Ccl17	chemokine (C-C motif) ligand 17	5.65733	3.16667	3.52825	2.47219	0	0	4.11742	0.824064	-3.29335	0.00183572	0.0111226
Polr2c	polymerase (RNA) II (DNA directed) polypeptide C	10.5457	10.3994	10.4389	10.7352	10.6434	10.8034	10.4613	10.7273	0.266011	0.027758	0.105679
Coq9	coenzyme Q9	11.9353	12.0006	12.1313	13.2098	13.2152	13.488	12.0224	13.3043	1.28197	1.14e-19	1.47e-17
Cngb1	cyclic nucleotide gated channel beta 1	1.7711	4.31845	4.94	5.60772	5.52186	4.79969	3.67652	5.30975	1.63324	0.0797758	0.241222
Kifc3	kinesin family member C3	10.7022	10.8434	11.1438	11.3493	11.4141	11.3956	10.8965	11.3863	0.489832	0.00160645	0.00993751
Agpat1	1-acylglycerol-3-phosphate O-acyltransferase 1 (lysophosphatidic acid acyltransferase, alpha)	9.83854	10.3194	9.15729	10.9422	10.8156	10.8716	9.77174	10.8765	1.10475	5.29e-05	0.000538735
4933407K13Rik	RIKEN cDNA 4933407K13 gene	6.12463	6.3887	6.38169	6.64842	6.88935	6.33199	6.29834	6.62326	0.324917	0.249361	0.546025
Gm1673	predicted gene 1673	3.2397	2.58191	0	4.14398	0	3.57767	1.94054	2.57388	0.633347	0.441145	0.775639
---	---	0	0	0	0	1.72461	0	0	0.574869	0.574869	0.625351	0.875654
Gm12502	predicted gene 12502	0	0	0	0	0	0.996028	0	0.332009	0.332009	0.839626	0.933154
Gm26413	predicted gene, 26413	1.1418	0.99817	0.969343	0.814054	1.10598	0.996028	1.03644	0.972021	-0.0644183	0.94473	0.980249
Tmem189	transmembrane protein 189	10.086	10.2383	10.6506	9.50791	9.3155	9.59383	10.325	9.47241	-0.852563	3.38e-06	4.82e-05
Itga10	integrin, alpha 10	5.69142	6.53554	6.68008	7.03783	6.69444	6.70637	6.30234	6.81288	0.510534	0.169153	0.416331
3830403N18Rik	RIKEN cDNA 3830403N18 gene	4.65142	4.38883	4.89426	5.25358	5.19873	5.60692	4.64484	5.35307	0.70824	0.0878455	0.259082
Gm16116	predicted gene 16116	0	0	1.54394	0	1.72461	0	0.514647	0.574869	0.0602229	0.95376	0.983921
Gm15657	predicted gene 15657	0	0	0.969343	0	0	0	0.323114	0	-0.323114	0.787905	0.927867
Trim34b	tripartite motif-containing 34B	2.81411	2.80422	0	3.22336	2.98454	3.4522	1.87277	3.22003	1.34726	0.294111	0.610026
Slc9a9	solute carrier family 9 (sodium/hydrogen exchanger), member 9	5.43396	7.93299	6.44651	7.02948	6.94439	7.01447	6.60449	6.99612	0.391629	0.954384	0.983934
Exosc4	exosome component 4	8.74189	8.90923	8.88652	9.01273	8.57045	9.20638	8.84588	8.92985	0.0839733	0.595693	0.875654
6430500D05Rik	RIKEN cDNA 6430500D05 gene	0	0	1.54394	1.3313	1.72461	0	0.514647	1.01864	0.503989	0.71439	0.909308
Pla2g3	phospholipase A2, group III	5.35109	6.12567	5.82174	6.16002	6.50607	5.51578	5.76617	6.06062	0.294457	0.428243	0.762656
Inpp5j	inositol polyphosphate 5-phosphatase J	7.29138	9.5199	8.56023	10.1244	10.0022	10.1707	8.45717	10.0991	1.64193	0.0219218	0.0871265
Ptpn13	protein tyrosine phosphatase, non-receptor type 13	7.0631	8.53162	8.16705	8.08967	7.91804	8.03099	7.92059	8.0129	0.0923106	0.927442	0.980249
Papd7	PAP associated domain containing 7	9.42022	8.79076	9.15729	8.85633	8.99544	8.70287	9.12276	8.85155	-0.271214	0.156718	0.395067
Daam1	dishevelled associated activator of morphogenesis 1	9.99513	10.6617	10.1919	10.8965	11.3125	11.0227	10.2829	11.0772	0.794326	0.000152574	0.00134746
Icmt	isoprenylcysteine carboxyl methyltransferase	10.179	10.2978	10.3831	10.2483	10.0917	10.267	10.2867	10.2023	-0.0843116	0.518819	0.838189
Morc2b	microrchidia 2B	4.16124	4.31845	3.74989	3.33596	5.28655	4.74723	4.07653	4.45658	0.380051	0.364349	0.697066
Gm9828	predicted gene 9828	3.95222	3.69706	4.58441	3.71483	2.48795	3.99254	4.0779	3.39844	-0.679455	0.350724	0.681455
Tsga10ip	testis specific 10 interacting protein	0	0	0	3.87249	2.15619	3.16286	0	3.06385	3.06385	0.000892198	0.00604663
Mfsd4b2	major facilitator superfamily domain containing 4B2	0	0	1.54394	1.71125	0	0	0.514647	0.570415	0.0557686	0.937038	0.980249
Defb25	defensin beta 25	0	0	0	0	0	0.996028	0	0.332009	0.332009	0.839626	0.933154
Cd200r4	CD200 receptor 4	3.41313	4.99645	3.74989	3.4404	0	2.31557	4.05316	1.91866	-2.1345	0.0516334	0.172573
Tal1	T cell acute lymphocytic leukemia 1	7.0631	7.61107	7.83915	7.75191	7.84037	7.95208	7.50444	7.84812	0.343682	0.217847	0.497961
Gm6055	predicted gene 6055	8.40446	7.97363	8.37699	8.31245	8.01121	8.48392	8.25169	8.26919	0.0174984	0.926778	0.980249
Gm22317	predicted gene, 22317	0	0	0	0.814054	0	0.996028	0	0.603361	0.603361	0.6901	0.898033
Tmem47	transmembrane protein 47	8.49409	8.77113	8.19089	9.03584	9.36928	8.9779	8.48537	9.12767	0.642303	0.00261085	0.0149662
Rps6ka6	ribosomal protein S6 kinase polypeptide 6	4.16124	3.80395	4.18928	4.01461	4.84091	4.69279	4.05149	4.5161	0.464614	0.341879	0.671763
Gm31258	predicted gene, 31258	0	0	0	0	1.72461	0.996028	0	0.906879	0.906879	0.50094	0.821491
Nrde2	nrde-2 necessary for RNA interference, domain containing	8.56014	8.71745	8.98253	8.50539	8.51699	8.68555	8.75337	8.56931	-0.184064	0.283202	0.595387
Psmc1	protease (prosome, macropain) 26S subunit, ATPase 1	12.5024	11.9668	12.5043	11.5049	11.5824	11.7183	12.3245	11.6019	-0.722643	3.79e-05	0.000404157
Esyt2	extended synaptotagmin-like protein 2	10.4935	10.4299	10.9549	10.2174	10.3505	10.1806	10.6261	10.2495	-0.376595	0.0250046	0.097099
A930032L01Rik	RIKEN cDNA A930032L01 gene	0	1.58252	2.27256	1.71125	0	0	1.28503	0.570415	-0.714612	0.575716	0.871956
Tdp1	tyrosyl-DNA phosphodiesterase 1	7.19962	8.05705	7.3221	7.84047	7.8331	7.75363	7.52626	7.80907	0.282811	0.396144	0.729775
Efcab11	EF-hand calcium binding domain 11	2.54257	3.99657	1.95377	0	1.10598	2.31557	2.83097	1.14052	-1.69045	0.0986816	0.28217
Cdca7l	cell division cycle associated 7 like	0	5.551	3.94197	4.5227	3.77368	4.31437	3.16433	4.20358	1.03926	0.862161	0.946946
Ssxb5	synovial sarcoma, X member B5	1.7711	0	0	0	0	0	0.590366	0	-0.590366	0.589356	0.875654
Gm37006	predicted gene, 37006	0	0	0	0	1.72461	0	0	0.574869	0.574869	0.625351	0.875654
Gm37008	predicted gene, 37008	0	1.58252	0	1.71125	1.72461	0.996028	0.527507	1.47729	0.949787	0.48532	0.81057
Gm37009	predicted gene, 37009	0	1.58252	0	1.3313	0	0	0.527507	0.443766	-0.0837415	0.929649	0.980249
Gm37452	predicted gene, 37452	2.54257	0.99817	1.54394	1.3313	2.48795	2.57834	1.69489	2.13253	0.437634	0.672132	0.88671
Col4a3bp	collagen, type IV, alpha 3 (Goodpasture antigen) binding protein	10.5398	10.0145	10.5013	10.048	10.1918	10.013	10.3519	10.0843	-0.267621	0.107054	0.299821
AL645522.1	---	2.54257	2.58191	3.4032	1.71125	1.10598	0.996028	2.84256	1.27108	-1.57148	0.0705536	0.219581
Myl12a	myosin, light chain 12A, regulatory, non-sarcomeric	14.8539	14.1065	15.0503	13.8192	13.9062	14.0723	14.6702	13.9326	-0.737652	0.00103156	0.00683818
Myom1	myomesin 1	14.565	14.6121	15.1116	14.9655	15.2099	15.2224	14.7629	15.1326	0.369712	0.0713918	0.221349
Cryaa	crystallin, alpha A	0	1.99725	0	2.65696	0	0	0.665751	0.885652	0.219901	0.758469	0.927867
Sik1	salt inducible kinase 1	11.8684	10.3138	11.0998	10.4226	10.0468	9.33413	11.094	9.93452	-1.15948	0.0189559	0.0775872
Arhgap28	Rho GTPase activating protein 28	6.12463	7.05165	6.9272	7.31698	8.03676	7.62144	6.70116	7.65839	0.957235	0.00363495	0.0197424
Epb41l3	erythrocyte membrane protein band 4.1 like 3	7.05002	8.23475	7.84517	8.50839	8.60502	8.60678	7.70998	8.5734	0.863413	0.00586021	0.0296
Akap8	A kinase (PRKA) anchor protein 8	11.3662	11.246	11.3732	11.3222	11.3378	11.1588	11.3285	11.2729	-0.0555403	0.653633	0.87912
Gm27390	predicted gene, 27390	1.1418	0.99817	0.969343	0.814054	1.10598	0.996028	1.03644	0.972021	-0.0644183	0.94473	0.980249
Obp2b	odorant binding protein 2B	0	0	0	2.26024	0	0	0	0.753414	0.753414	0.491422	0.813059
N6amt1	N-6 adenine-specific DNA methyltransferase 1 (putative)	9.94303	9.07849	9.47532	8.72549	9.12318	9.09797	9.49895	8.98221	-0.516739	0.0221731	0.0879364
Mkrn2os	makorin, ring finger protein 2, opposite strand	2.54257	3.90347	2.5335	3.9453	5.5576	5.27765	2.99318	4.92685	1.93367	0.00374842	0.0202497
Dock5	dedicator of cytokinesis 5	8.50371	9.07049	9.0388	8.21643	8.37397	8.38009	8.871	8.32349	-0.547503	0.00536228	0.0274788
Lrch1	leucine-rich repeats and calponin homology (CH) domain containing 1	9.07126	9.00757	9.56746	9.17858	9.15852	9.13417	9.21543	9.15709	-0.0583415	0.670165	0.885788
Gm14648	predicted gene 14648	6.17368	6.20584	6.16768	6.08144	5.98259	5.96945	6.1824	6.01116	-0.171239	0.556358	0.855443
Ttc19	tetratricopeptide repeat domain 19	9.76242	9.6257	9.70462	9.88632	10.1645	10.1682	9.69758	10.073	0.375439	0.00853472	0.0404775
Gm5617	predicted gene 5617	6.76002	7.05165	7.16726	7.46051	7.12199	7.52347	6.99298	7.36866	0.375682	0.124412	0.334721
Mkl1	MKL (megakaryoblastic leukemia)/myocardin-like 1	8.73782	8.96501	8.38115	8.62102	8.67177	8.49191	8.69466	8.5949	-0.0997557	0.556954	0.856054
Gm6880	predicted gene 6880	0	0	1.95377	0	0	0	0.651255	0	-0.651255	0.538612	0.843174
Irf2bpl	interferon regulatory factor 2 binding protein-like	10.2393	9.96213	10.3779	10.4758	10.2017	10.3061	10.1931	10.3278	0.134729	0.421962	0.75697
S1pr4	sphingosine-1-phosphate receptor 4	5.75726	4.45594	5.18761	5.89184	4.7817	5.12156	5.1336	5.26503	0.131425	0.793328	0.931332
Gpr146	G protein-coupled receptor 146	12.3956	10.9743	11.7486	10.6829	10.6465	10.9549	11.7062	10.7614	-0.944746	0.000368357	0.00284735
Snora57	small nucleolar RNA, H/ACA box 57	4.25539	4.16647	0.969343	2.47219	1.72461	2.31557	3.1304	2.17079	-0.95961	0.10474	0.295312
---	---	1.1418	2.9968	2.75439	2.65696	1.72461	1.99404	2.29766	2.1252	-0.172464	0.724457	0.913235
---	---	4.06051	4.52006	4.33335	5.00378	3.99836	4.8992	4.30464	4.63378	0.329141	0.438092	0.77292
Car2	carbonic anhydrase 2	7.60029	7.19604	7.11837	7.384	7.30134	7.42672	7.3049	7.37069	0.0657889	0.811305	0.933154
AC139941.1	---	1.1418	0.99817	1.95377	0	1.10598	1.57966	1.36458	0.895215	-0.469365	0.686175	0.897058
Catspere1	cation channel sperm associated auxiliary subunit epsilon 1	0	0.99817	0	0	0	0	0.332723	0	-0.332723	0.787905	0.927867
Rnf169	ring finger protein 169	10.463	9.25844	10.7038	8.60987	8.70403	8.50777	10.1417	8.60722	-1.53451	8.72e-08	1.79e-06
Ltbp1	latent transforming growth factor beta binding protein 1	9.5536	10.1725	10.2361	10.6148	10.8257	10.6538	9.98742	10.6981	0.710696	0.000594358	0.00428291
Bsx	brain specific homeobox	2.2078	1.99725	0	0	0	0	1.40169	0	-1.40169	0.191698	0.454863
Gm22320	predicted gene, 22320	0	0	0	0	0	1.57966	0	0.526555	0.526555	0.659841	0.87912
Impa1	inositol (myo)-1(or 4)-monophosphatase 1	9.04513	9.42261	8.99613	9.11293	9.08388	8.89895	9.15462	9.03192	-0.122702	0.459046	0.792048
AW112010	expressed sequence AW112010	8.18875	7.53552	7.37301	9.28234	9.22115	8.91687	7.69909	9.14012	1.44103	1.15e-08	2.91e-07
Fabp5	fatty acid binding protein 5, epidermal	9.88162	10.852	9.53429	11.1394	10.7505	10.7677	10.0893	10.8858	0.796548	0.0199494	0.0807597
Fjx1	four jointed box 1 (Drosophila)	8.17677	6.50417	6.84544	4.37238	3.99836	3.99254	7.17546	4.1211	-3.05437	2.72e-11	1.13e-09
Gm10800	predicted gene 10800	0	0	0	2.0117	0	5.38455	0	2.46542	2.46542	0.110625	0.307358
Chmp4c	charged multivesicular body protein 4C	10.1865	9.15369	9.6609	9.23956	9.47118	9.28438	9.66704	9.33171	-0.335335	0.115584	0.31721
Gm12891	predicted gene 12891	1.1418	0.99817	0	1.3313	1.10598	0	0.713325	0.812426	0.0991013	0.897029	0.966369
Hmgb1-ps6	high mobility group box 1, pseudogene 6	1.7711	0.99817	0.969343	0.814054	1.10598	0.996028	1.2462	0.972021	-0.274183	0.745125	0.925633
Rpl38-ps2	ribosomal protein L38, pseudogene 2	9.11272	9.33842	9.15971	8.9588	8.59646	9.02273	9.20362	8.85933	-0.344291	0.059095	0.191328
Gm2214	predicted gene 2214	0	0	0	0	0	0.996028	0	0.332009	0.332009	0.839626	0.933154
R3hcc1l	R3H domain and coiled-coil containing 1 like	10.0421	8.93886	9.06999	8.67821	8.66769	8.85625	9.35032	8.73405	-0.616272	0.0136954	0.0599486
Atp4a	ATPase, H+/K+ exchanging, gastric, alpha polypeptide	0	2.319	0	0	0	0	0.773	0	-0.773	0.461623	0.792048
---	---	2.2078	0	1.54394	0	0	0	1.25058	0	-1.25058	0.256649	0.556594
Snx17	sorting nexin 17	10.6716	10.7752	10.8464	10.6321	10.5477	10.6583	10.7644	10.6127	-0.151717	0.200591	0.469315
Dok4	docking protein 4	7.82418	8.3495	8.26015	9.7212	9.92558	9.61411	8.14461	9.75363	1.60902	8.89e-17	8.14e-15
Nrl	neural retina leucine zipper gene	0	1.99725	0	1.3313	0	2.31557	0.665751	1.21562	0.54987	0.705149	0.909308
Gm12998	predicted gene 12998	0	0	1.95377	0	0	0	0.651255	0	-0.651255	0.538612	0.843174
Gm15379	predicted gene 15379	0	0	0	1.71125	0	1.99404	0	1.23509	1.23509	0.288155	0.601666
Tas1r3	taste receptor, type 1, member 3	5.21712	5.20589	6.10882	4.61486	4.36399	5.24018	5.51061	4.73968	-0.770934	0.0893047	0.262135
Slc35e3	solute carrier family 35, member E3	8.36804	8.17128	7.79627	7.93736	7.97862	7.95786	8.11186	7.95795	-0.153916	0.416413	0.750396
Myh13	myosin, heavy polypeptide 13, skeletal muscle	0	0	1.54394	2.0117	2.48795	2.31557	0.514647	2.27174	1.75709	0.137383	0.359393
Las1l	LAS1-like (S. cerevisiae)	12.1057	11.0277	11.695	10.7719	10.8026	10.9049	11.6095	10.8265	-0.782973	0.000489539	0.00362944
Gm9694	predicted gene 9694	2.54257	0	0	1.71125	0	1.57966	0.847525	1.09697	0.249445	0.959733	0.986884
Serpinb11	serine (or cysteine) peptidase inhibitor, clade B (ovalbumin), member 11	0	4.58145	0	0	0	0	1.52715	0	-1.52715	0.0302906	0.113257
Gm4767	predicted gene 4767	5.69142	5.28183	4.98433	5.46644	5.87338	5.85016	5.3192	5.73	0.410801	0.29275	0.608347
Ighv1-80	immunoglobulin heavy variable 1-80	4.25539	4.08402	2.27256	5.13408	2.48795	4.31437	3.53732	3.9788	0.441479	0.450321	0.784026
Wrnip1	Werner helicase interacting protein 1	9.1469	9.14609	9.21192	9.40034	9.20151	9.38652	9.1683	9.32946	0.161155	0.242704	0.535629
Abhd17b	abhydrolase domain containing 17B	9.04513	8.27712	8.8116	7.80668	7.53444	7.592	8.71128	7.64437	-1.06691	5.04e-06	6.87e-05
Dnah14	dynein, axonemal, heavy chain 14	5.90982	4.31845	5.61169	3.33596	3.50742	3.31477	5.27998	3.38605	-1.89393	0.000283623	0.00228687
Mir331	microRNA 331	0	0.99817	0.969343	0.814054	1.10598	0.996028	0.655838	0.972021	0.316183	0.816605	0.933154
Cstad	CSA-conditional, T cell activation-dependent protein	0	1.99725	3.74989	1.3313	3.35327	4.45184	1.91572	3.04547	1.12975	0.41889	0.75346
Gm973	predicted gene 973	3.70771	5.69685	0	5.53881	2.48795	2.31557	3.13485	3.44744	0.312589	0.90956	0.972944
Aida	axin interactor, dorsalization associated	10.1955	10.1688	10.1943	10.1352	10.2115	10.0527	10.1862	10.1332	-0.0530208	0.663619	0.882138
Foxo4	forkhead box O4	9.97452	9.75789	9.96875	10.6397	10.4513	10.6332	9.90039	10.5747	0.674338	7.93e-07	1.33e-05
---	---	0	1.99725	1.54394	2.0117	0	2.31557	1.1804	1.44242	0.262025	0.769257	0.927867
Vars	valyl-tRNA synthetase	11.2052	10.7046	10.666	10.2474	9.78566	10.0541	10.8586	10.029	-0.829535	2.58e-05	0.000290602
---	---	10.423	10.7437	11.3016	11.8474	11.878	12.0788	10.8228	11.9347	1.11196	1.39e-06	2.21e-05
Syngr3	synaptogyrin 3	0	2.319	0	2.96778	2.98454	3.79997	0.773	3.25076	2.47776	0.0370683	0.13283
Ripk1	receptor (TNFRSF)-interacting serine-threonine kinase 1	9.81554	9.57754	9.88499	8.52333	8.67584	8.314	9.75936	8.50439	-1.25497	1.97e-13	1.16e-11
Kcmf1	potassium channel modulatory factor 1	11.8359	10.9204	11.538	11.0133	11.2193	11.2173	11.4314	11.15	-0.281474	0.144176	0.371929
Gm11599	predicted gene 11599	2.81411	2.319	1.54394	2.26024	1.72461	2.57834	2.22568	2.18773	-0.0379529	0.940006	0.980249
Gm23833	predicted gene, 23833	0	2.58191	0.969343	0.814054	2.15619	1.57966	1.18375	1.51664	0.332884	0.996212	0.998023
Zfp831	zinc finger protein 831	3.83514	3.58161	3.4032	2.65696	0	1.57966	3.60665	1.41221	-2.19444	0.0340648	0.124063
Slc14a2	solute carrier family 14 (urea transporter), member 2	0	0.99817	0	0	0	0	0.332723	0	-0.332723	0.787905	0.927867
Pipox	pipecolic acid oxidase	3.56793	2.58191	3.11496	3.71483	4.65544	4.57734	3.08827	4.31587	1.2276	0.04407	0.152631
Rasl2-9	RAS-like, family 2, locus 9	5.62243	5.45585	6.58251	6.3328	6.45012	6.54672	5.88693	6.44321	0.556284	0.219474	0.500812
Gm26973	predicted gene, 26973	0	0.99817	0	0	0	0	0.332723	0	-0.332723	0.787905	0.927867
Gm13148	predicted gene 13148	0	0	1.95377	0.814054	0	0	0.651255	0.271351	-0.379904	0.678296	0.890899
Gm22334	predicted gene, 22334	0	0.99817	0	0	0	0	0.332723	0	-0.332723	0.787905	0.927867
Gm6088	predicted gene 6088	0	0	0.969343	0	0	0	0.323114	0	-0.323114	0.787905	0.927867
Ctsz	cathepsin Z	10.587	11.5911	10.7013	10.3748	10.0326	10.3038	10.9598	10.2371	-0.722731	0.00237509	0.0138134
Prelid3b	PRELI domain containing 3B	10.6479	10.4331	10.38	10.5491	10.414	10.5733	10.487	10.5121	0.0251452	0.864477	0.947361
Atp5e	ATP synthase, H+ transporting, mitochondrial F1 complex, epsilon subunit	12.1683	12.1247	12.0416	12.7397	12.5764	12.7652	12.1115	12.6938	0.582227	1.53e-06	2.4e-05
Nelfcd	negative elongation factor complex member C/D, Th1l	9.63248	9.61656	9.76146	9.99642	9.74167	9.97076	9.67017	9.90295	0.232785	0.0946564	0.273499
Krt23	keratin 23	0	4.31845	0	4.01461	1.72461	0	1.43948	1.91307	0.473591	0.972511	0.988172
Myb	myeloblastosis oncogene	0	6.18621	0	3.87249	0	2.99304	2.06207	2.28851	0.226441	0.615527	0.875654
Gm43506	predicted gene 43506	1.7711	0	0	0	0	0	0.590366	0	-0.590366	0.589356	0.875654
Gm22335	predicted gene, 22335	0	0	0.969343	0	0	0	0.323114	0	-0.323114	0.787905	0.927867
Klk8	kallikrein related-peptidase 8	6.39666	7.07318	6.53859	7.53906	7.63823	7.14185	6.66948	7.43971	0.770238	0.00809044	0.0387954
Cse1l	chromosome segregation 1-like (S. cerevisiae)	10.428	10.5595	10.3985	10.197	10.3543	10.4162	10.462	10.3225	-0.139521	0.286334	0.599516
Gm42478	predicted gene 42478	0	0	0	0	3.35327	1.57966	0	1.64431	1.64431	0.0828976	0.248111
Gm44148	predicted gene, 44148	0	0	0	1.71125	0	0	0	0.570415	0.570415	0.616793	0.875654
Gm30055	predicted gene, 30055	0	1.99725	0	1.71125	2.15619	1.57966	0.665751	1.8157	1.14995	0.461551	0.792048
Mir1896	microRNA 1896	0	0	0.969343	0.814054	0	0	0.323114	0.271351	-0.051763	0.973412	0.988172
Mir1898	microRNA 1898	3.04254	2.80422	2.75439	2.26024	2.48795	1.57966	2.86705	2.10929	-0.757764	0.360058	0.692178
Gm21310	predicted gene, 21310	0	0	0	0	1.10598	0	0	0.36866	0.36866	0.839626	0.933154
Cyp51	cytochrome P450, family 51	8.05115	8.58506	8.79303	8.55567	8.02404	8.3185	8.47641	8.2994	-0.177008	0.434574	0.768858
[truncated: 28,303 more rows]
